# Supplementary material for: The Master Regulator of the Cellular Stress Response (HSF1) Is Critical for Orthopoxvirus Infection
Source: PLoS Pathog. 2014 Feb 6;10(2):e1003904. doi: 10.1371/journal.ppat.1003904 (PMC3916389; doi:10.1371/journal.ppat.1003904)
Supplement: Table S3 — Secondary screen data. The relative fluorescent units for Venus (under an early gene promoter) and mCherry (under a late gene promoter) were normalized to the average RFU across each plate. The normalized data for early and late gene VACV gene expression are provided with the information for each hairpin screened in the arrayed secondary screen format. Three replicates of the secondary screen are represented. (XLSX) [file ppat.1003904.s005.xlsx]

## Sheet: Table Paper
								Early			Late
Clone Name	Clone ID	RefSeq	Symbol	NCBI Gene ID	Preferred Gene Name	Region	Target Seq	Replicate 1	Replicate 2	Replicate 3	Replicate 1	Replicate 2	Replicate 3
NM_001086.2-682s1c1	TRCN0000157142	NM_001086	AADAC	13	arylacetamide deacetylase	CDS	GTGACTCAACAGCTCCTTGAT	110.807	84.5061	151.462	123.827	92.011	204.168
NM_001086.1-1435s1c1	TRCN0000075273	NM_001086	AADAC	13	arylacetamide deacetylase	3UTR	CTGTGGGATTTCATTTCAATT	164.448	96.1523	121.01	201.411	86.358	104.138
NM_001086.2-877s1c1	TRCN0000157178	NM_001086	AADAC	13	arylacetamide deacetylase	CDS	GCCATGCTTTCCAGACAACAT	183.218	39.5428	217.444	171.794	60.6812	206.328
NM_001086.1-505s1c1	TRCN0000075275	NM_001086	AADAC	13	arylacetamide deacetylase	CDS	CGTATCAACCAACTACAGATT	125.946	107.432	86.6151	119.074	91.5052	62.5606
NM_001086.2-948s1c1	TRCN0000152784	NM_001086	AADAC	13	arylacetamide deacetylase	CDS	GCTCCCTGAGAGGTTTATAAA	137.922	154.572	162.197	134.429	160.949	158.945
NM_002313.5-2220s1c1	TRCN0000061902	NM_002313	ABLIM1	3983	LIM actinbinding protein 1|actinbinding LIM protein 1|actinbinding doublezincfinger protein	CDS	GCCCAACATGTTGGAACCAAA	182.573	130.169	162.296	196.372	175.141	155.436
NM_002313.5-1154s1c1	TRCN0000061899	NM_002313	ABLIM1	3983	LIM actinbinding protein 1|actinbinding LIM protein 1|actinbinding doublezincfinger protein	CDS	CCTCGGAAAGTATTTATTCTA	117.852	147.03	187.331	95.2089	118.194	196.878
NM_002313.5-382s1c1	TRCN0000061901	NM_002313	ABLIM1	3983	LIM actinbinding protein 1|actinbinding LIM protein 1|actinbinding doublezincfinger protein	CDS	CCTGTCATTCACTGCCATAAA	107.474	134.59	77.7724	108.33	109.506	65.9355
NM_002313.5-4014s1c1	TRCN0000061898	NM_002313	ABLIM1	3983	LIM actinbinding protein 1|actinbinding LIM protein 1|actinbinding doublezincfinger protein	3UTR	GCCACTTTATTATCATGCTTT	79.1732	111.281	84.7231	76.8589	55.5041	78.2198
NM_002313.5-2334s1c1	TRCN0000061900	NM_002313	ABLIM1	3983	LIM actinbinding protein 1|actinbinding LIM protein 1|actinbinding doublezincfinger protein	CDS	CCCTGAAGTGTTTCGGGAAAT	89.4381	104.361	105.237	88.2682	68.774	101.439
NM_012332.1-1200s1c1	TRCN0000048904	NM_012332	ACOT9	23597	acylCoenzyme A thioesterase 2, mitochondrial|mitochondrial AcylCoA Thioesterase	CDS	GCATACAACCACCAATGTCTT	213.721	141.3	326.449	286.713	183.699	394.056
NM_012332.1-606s21c1	TRCN0000226638	NM_012332	ACOT9	23597	acylCoenzyme A thioesterase 2, mitochondrial|mitochondrial AcylCoA Thioesterase	CDS	CCAGTTACATGGTGATGAATT	87.5885	102.534	157.892	100.572	103.082	264.839
NM_012332.1-339s1c1	TRCN0000048903	NM_012332	ACOT9	23597	acylCoenzyme A thioesterase 2, mitochondrial|mitochondrial AcylCoA Thioesterase	CDS	GCCTGAATTACGAGAGAAATA	121.851	99.8404	88.3105	125.326	128.389	86.4461
NM_012332.1-973s1c1	TRCN0000048907	NM_012332	ACOT9	23597	acylCoenzyme A thioesterase 2, mitochondrial|mitochondrial AcylCoA Thioesterase	CDS	CGGATCTTTGGTGGTTTCCTT	138.637	101.911	62.175	157.737	102.15	54.2526
NM_012332.1-489s21c1	TRCN0000226639	NM_012332	ACOT9	23597	acylCoenzyme A thioesterase 2, mitochondrial|mitochondrial AcylCoA Thioesterase	CDS	CCTGGTGGATAAGATTGATAT	94.4893	109.524	94.6011	79.6961	108.225	85.4123
NM_032217.3-2085s21c1	TRCN0000274384	NM_032217	ANKRD17	26057	ankyrin repeat domain protein 17|gene trap ankyrin repeat|serologically defined breast cancer antigen NYBR16	CDS	GAATAGAACCACAGCTAATAA	91.8288	80.9056	99.9283	74.0025	69.6705	89.7254
NM_032217.3-1602s21c1	TRCN0000285199	NM_032217	ANKRD17	26057	ankyrin repeat domain protein 17|gene trap ankyrin repeat|serologically defined breast cancer antigen NYBR16	CDS	GGTCAATGATGAAGGTTATAC	69.6269	105.799	110.737	57.2911	101.889	94.8875
NM_032217.3-4258s21c1	TRCN0000274424	NM_032217	ANKRD17	26057	ankyrin repeat domain protein 17|gene trap ankyrin repeat|serologically defined breast cancer antigen NYBR16	CDS	GCAGCAGATAACCGCAAGATA	44.9971	87.3036	76.3008	33.992	77.6074	59.1394
NM_032217.3-1790s21c1	TRCN0000274385	NM_032217	ANKRD17	26057	ankyrin repeat domain protein 17|gene trap ankyrin repeat|serologically defined breast cancer antigen NYBR16	CDS	CCGATATAGAACTAGGGTGTT	94.7212	61.8154	65.3987	83.9809	41.583	53.3319
NM_032217.3-8243s21c1	TRCN0000285198	NM_032217	ANKRD17	26057	ankyrin repeat domain protein 17|gene trap ankyrin repeat|serologically defined breast cancer antigen NYBR16	3UTR	TCTGAGCAAACACGGAAATTT	64.5592	122.863	85.0077	49.3471	132.804	63.1401
NM_001155.3-1298s21c1	TRCN0000380356	NM_001155	ANXA6	309	annexin VI|annexin VI (p68)|calciumbinding protein p68|calelectrin|calphobindin II	CDS	CGAAGACACAATCATCGATAT	95.1674	84.9704	80.8039	90.5227	68.7262	85.4199
NM_001155.2-804s1c1	TRCN0000008686	NM_001155	ANXA6	309	annexin VI|annexin VI (p68)|calciumbinding protein p68|calelectrin|calphobindin II	CDS	CGGTTGGTGTTCGATGAGTAT	89.5081	135.574	90.1466	89.3787	174.75	114.108
NM_001155.3-1565s21c1	TRCN0000381717	NM_001155	ANXA6	309	annexin VI|annexin VI (p68)|calciumbinding protein p68|calelectrin|calphobindin II	CDS	GGCCATCAATGAGGCCTATAA	80.7697	66.3682	85.0232	71.2956	55.0104	85.8826
NM_001155.3-787s21c1	TRCN0000381506	NM_001155	ANXA6	309	annexin VI|annexin VI (p68)|calciumbinding protein p68|calelectrin|calphobindin II	CDS	GGTTGGTGTTCGATGAGTATC	77.1429	115.167	102.982	60.7317	125.188	112.026
NM_001155.3-2582s21c1	TRCN0000381630	NM_001155	ANXA6	309	annexin VI|annexin VI (p68)|calciumbinding protein p68|calelectrin|calphobindin II	3UTR	GGTGGTGGGAAGGATAGTAAA	65.0697	116.047	79.8111	41.4493	112.44	55.9224
NM_000038.4-2292s21c1	TRCN0000237830	NM_000038	APC	324	adenomatosis polyposis coli tumor suppressor	CDS	AGTACAAGGATGCCAATATTA	132.929	123.175	123.27	101.707	115.667	110.07
NM_000038.4-1982s21c1	TRCN0000244294	NM_000038	APC	324	adenomatosis polyposis coli tumor suppressor	CDS	GAAAGTGGAGGTGGGATATTA	136.312	114.753	107.309	133.148	95.6896	92.1304
NM_000038.4-2542s21c1	TRCN0000237828	NM_000038	APC	324	adenomatosis polyposis coli tumor suppressor	CDS	GACTGTCCTTTCACCATATTT	164.512	127.32	102.096	220.664	117.16	88.8294
NM_000038.2-9031s1c1	TRCN0000040093	NM_000038	APC	324	adenomatosis polyposis coli tumor suppressor	3UTR	GCTGTGAAATTCACAGTAATA	124.889	58.3095	101.859	117.114	48.7529	109.353
NM_000038.x-583s1c1	TRCN0000010296	NM_000038	APC	324	adenomatosis polyposis coli tumor suppressor	CDS	CAGATATGACCAGAAGGCAAT	109.677	136.285	137.401	111.102	154.895	131.455
NM_030882.2-2103s1c1	TRCN0000083103	NM_030882	APOL2	23780	OTTHUMP00000028936|apolipoprotein LII|apolipoprotein L2	3UTR	CCTTCCAAGAATAAAGTCTTT	89.4999	98.5417	110.735	80.8426	88.3226	121.15
NM_030882.2-362s21c1	TRCN0000296614	NM_030882	APOL2	23780	OTTHUMP00000028936|apolipoprotein LII|apolipoprotein L2	CDS	TTGAGGATTACCTTAAGTATT	144.26	98.6011	75.5708	130.511	89.3662	60.1597
NM_030882.2-1296s21c1	TRCN0000290388	NM_030882	APOL2	23780	OTTHUMP00000028936|apolipoprotein LII|apolipoprotein L2	CDS	GCTCAACTTTCTCACCAAGAT	119.207	70.84	117.84	110.043	76.545	82.4588
NM_030882.2-833s1c1	TRCN0000083105	NM_030882	APOL2	23780	OTTHUMP00000028936|apolipoprotein LII|apolipoprotein L2	CDS	GCAGTGTGGTAGAACTAGTAA	115.676	69.5562	119.492	107.85	57.1269	94.716
NM_030882.2-951s21c1	TRCN0000290384	NM_030882	APOL2	23780	OTTHUMP00000028936|apolipoprotein LII|apolipoprotein L2	CDS	TGTTCTTACCTTAGTTGACAA	133.071	97.2728	70.2532	131.348	103.865	52.7759
NM_015595.2-2203s1c1	TRCN0000048292	NM_015595	ARHGEF26	26084		CDS	GCAAGTCTACTTCTTTCTCTT	102.77	109.281	126.647	99.6301	112.898	106.433
NM_015595.2-2425s1c1	TRCN0000048290	NM_015595	ARHGEF26	26084		CDS	CGCGAATGAGAAAGTGGAGAT	136.857	81.1294	130.709	130.435	68.0599	103.733
NM_015595.2-298s1c1	TRCN0000048289	NM_015595	ARHGEF26	26084		CDS	CGGGTTACTAATTACGGATTT	105.812	118.056	85.3405	100.201	76.48	92.124
NM_015595.2-1967s1c1	TRCN0000048291	NM_015595	ARHGEF26	26084		CDS	CCGAAGTATGAAGTCTGCAAA	64.9137	102.245	123.639	62.1693	93.2904	144.501
NM_015595.2-1733s1c1	TRCN0000048288	NM_015595	ARHGEF26	26084		CDS	GCATCCACATTTGACCCATAT	65.0832	111.22	110.196	61.266	111.231	112.238
NM_001661.3-1046s21c1	TRCN0000380326	NM_001661	ARL4D	379	ADPribosylation factor 4like|ADPribosylation factorlike 6	3UTR	ACTCTACCTCGACCCTGTTTC	75.4687	103.091	47.512	69.7864	80.7193	40.9617
NM_001661.3-459s21c1	TRCN0000234135	NM_001661	ARL4D	379	ADPribosylation factor 4like|ADPribosylation factorlike 6	CDS	GGACAGACGGTCTAGTGTTTG	108.626	133.494	175.338	109.335	158.727	245.641
NM_001661.2-715s1c1	TRCN0000048080	NM_001661	ARL4D	379	ADPribosylation factor 4like|ADPribosylation factorlike 6	CDS	TGAGCGCCTCTATGAGATGAT	103.277	121.761	104.625	88.4393	113.518	91.9101
NM_001661.3-1137s21c1	TRCN0000382094	NM_001661	ARL4D	379	ADPribosylation factor 4like|ADPribosylation factorlike 6	3UTR	AGAATGTGTTTGGGATGAAAT	91.1196	91.4994	57.1515	80.7429	85.08	38.5989
NM_001661.3-1015s21c1	TRCN0000234138	NM_001661	ARL4D	379	ADPribosylation factor 4like|ADPribosylation factorlike 6	3UTR	CAGGACTGTGGAGACGTAAAT	93.2358	129.62	72.335	72.3087	128.091	63.1132
NM_006395.1-1520s1c1	TRCN0000007586	NM_006395	ATG7	10533	APG7 autophagy 7like|ubiquitin activating enzyme E1like protein	CDS	GCTTTGGGATTTGACACATTT	123.945	114.791	142.622	136.782	114.712	165.237
NM_006395.1-491s1c1	TRCN0000007585	NM_006395	ATG7	10533	APG7 autophagy 7like|ubiquitin activating enzyme E1like protein	CDS	CCAGAGAGTTTACCTCTCATT	73.942	124.934	92.4159	67.2823	135.496	104.16
NM_006395.1-685s1c1	TRCN0000007588	NM_006395	ATG7	10533	APG7 autophagy 7like|ubiquitin activating enzyme E1like protein	CDS	CCAAGGTCAAAGGACGAAGAT	87.3053	80.5718	93.9582	83.2618	80.9274	102.54
NM_006395.1-268s1c1	TRCN0000007587	NM_006395	ATG7	10533	APG7 autophagy 7like|ubiquitin activating enzyme E1like protein	CDS	CCCAGCTATTGGAACACTGTA	114.64	87.8202	111.066	136.902	82.6103	101.615
NM_006395.1-2173s1c1	TRCN0000007584	NM_006395	ATG7	10533	APG7 autophagy 7like|ubiquitin activating enzyme E1like protein	3UTR	GCCTGCTGAGGAGCTCTCCAT	102.19	123.822	136.665	75.8994	110	132.963
NM_005765.2-149s21c1	TRCN0000296224	NM_005765	ATP6AP2	10159	ATPase membrane sector associated protein M89|ATPase, H+ transporting, lysosomal (vacuolar proton pump) membrane sector associated protein M89|ATPase, H+ transporting, lysosomal interacting protein 2|VATPase M8.9 subunit|embryonic liver differentiation fa	CDS	GGAACGAGTTTAGTATATTAA	103.634	104.044	110.917	67.9885	98.4028	77.8628
NM_005765.2-292s21c1	TRCN0000289221	NM_005765	ATP6AP2	10159	ATPase membrane sector associated protein M89|ATPase, H+ transporting, lysosomal (vacuolar proton pump) membrane sector associated protein M89|ATPase, H+ transporting, lysosomal interacting protein 2|VATPase M8.9 subunit|embryonic liver differentiation fa	CDS	GCAGTGGGTAACCTGTTTCAT	124.818	136.606	154.91	128.771	172.953	130.012
NM_005765.2-415s21c1	TRCN0000308100	NM_005765	ATP6AP2	10159	ATPase membrane sector associated protein M89|ATPase, H+ transporting, lysosomal (vacuolar proton pump) membrane sector associated protein M89|ATPase, H+ transporting, lysosomal interacting protein 2|VATPase M8.9 subunit|embryonic liver differentiation fa	CDS	AGTCTTGACAGTGTTGCAAAT	132.453	120.748	105.953	126.714	93.544	99.4857
NM_005765.2-1310s21c1	TRCN0000296225	NM_005765	ATP6AP2	10159	ATPase membrane sector associated protein M89|ATPase, H+ transporting, lysosomal (vacuolar proton pump) membrane sector associated protein M89|ATPase, H+ transporting, lysosomal interacting protein 2|VATPase M8.9 subunit|embryonic liver differentiation fa	3UTR	CTAGAGTGAATTATAGTATTG	105.457	112.008	130.346	92.3014	73.9898	119.837
NM_005765.2-1099s1c1	TRCN0000038604	NM_005765	ATP6AP2	10159	ATPase membrane sector associated protein M89|ATPase, H+ transporting, lysosomal (vacuolar proton pump) membrane sector associated protein M89|ATPase, H+ transporting, lysosomal interacting protein 2|VATPase M8.9 subunit|embryonic liver differentiation fa	CDS	CCTGGATATGATAGCATCATT	53.7266	92.4749	71.3746	44.7042	86.3006	56.4711
NM_005603.1-3513s1c1	TRCN0000050123	NM_005603	ATP8B1	5205	E1E2 ATPase|phospholipidtransporting ATPase IC	CDS	GCCATCAGAAAGTGATAAGAT	127.338	100.05	109.296	136.077	127.013	96.8706
NM_005603.1-3235s1c1	TRCN0000050125	NM_005603	ATP8B1	5205	E1E2 ATPase|phospholipidtransporting ATPase IC	CDS	GCTCTTGTAATAACAGTCAAT	72.3558	73.7615	111.601	56.5314	54.0393	108.104
NM_005603.1-1798s1c1	TRCN0000050124	NM_005603	ATP8B1	5205	E1E2 ATPase|phospholipidtransporting ATPase IC	CDS	CGGAAGCGAATGTCTATCATT	52.7966	58.5125	49.3216	46.0698	54.0742	49.052
NM_005603.1-1527s1c1	TRCN0000050127	NM_005603	ATP8B1	5205	E1E2 ATPase|phospholipidtransporting ATPase IC	CDS	CCACTATCTTATTGAGCAAAT	119.353	125.28	139.39	119.159	131.999	141.805
NM_005603.1-2820s1c1	TRCN0000050126	NM_005603	ATP8B1	5205	E1E2 ATPase|phospholipidtransporting ATPase IC	CDS	CCGATGGTCTTACATAAGGAT	54.144	91.0521	96.4688	35.137	48.9838	103.854
XM_088691.3-345s1c1	TRCN0000036217	XM_088691	AWAT1	158833	acylCoA wax alcohol acyltransferase 1	CDS	GCTGTCCTGGTTCTTCAAGAT	117.909	84.7029	72.766	110.477	77.1	64.5597
XM_088691.3-868s1c1	TRCN0000036215	XM_088691	AWAT1	158833	acylCoA wax alcohol acyltransferase 1	CDS	GACCAGCATAAGACCCACTAT	93.0184	103.261	59.8547	104.228	94.4961	56.6873
XM_088691.3-669s1c1	TRCN0000036214	XM_088691	AWAT1	158833	acylCoA wax alcohol acyltransferase 1	CDS	CCGCCGTATCTTTGGTTTCTA	113.249	91.841	104.84	113.529	80.9417	84.0469
XM_088691.3-104s1c1	TRCN0000036216	XM_088691	AWAT1	158833	acylCoA wax alcohol acyltransferase 1	CDS	CCGCTACCAGTGCTTTACTTT	149.081	114.217	139.128	171.897	127.621	128.184
XM_088691.3-820s1c1	TRCN0000036218	XM_088691	AWAT1	158833	acylCoA wax alcohol acyltransferase 1	CDS	GTGGACAAATACCATGCACTT	143.834	68.7598	96.1516	182.021	68.6194	103.018
NM_058243.1-1485s1c1	TRCN0000021426	NM_058243	BRD4	23476	bromodomaincontaining 4|bromodomaincontaining protein 4|chromosomeassociated protein	CDS	CGTCCGATTGATGTTCTCCAA	69.796	73.4319	87.8898	65.0216	53.0049	91.1791
NM_058243.1-4626s1c1	TRCN0000196576	NM_058243	BRD4	23476	bromodomaincontaining 4|bromodomaincontaining protein 4|chromosomeassociated protein	3UTR	GCCAAATGTCTACACAGTATA	89.2686	81.1572	152.657	78.9981	50.9222	226.712
NM_058243.2-1707s21c1	TRCN0000318773	NM_058243	BRD4	23476	bromodomaincontaining 4|bromodomaincontaining protein 4|chromosomeassociated protein	CDS	CAGTGACAGTTCGACTGATGA	61.0321	79.641	65.5041	51.9008	48.9585	63.1006
NM_058243.1-504s1c1	TRCN0000021425	NM_058243	BRD4	23476	bromodomaincontaining 4|bromodomaincontaining protein 4|chromosomeassociated protein	CDS	CCCTGATTACTATAAGATCAT	90.0434	80.3463	81.0187	80.7095	62.0498	65.6655
NM_058243.1-646s1c1	TRCN0000021427	NM_058243	BRD4	23476	bromodomaincontaining 4|bromodomaincontaining protein 4|chromosomeassociated protein	CDS	CCTGGAGATGACATAGTCTTA	-0.944682	0.0499839	-1.95178	0.320889	0.520677	-2.5058
NM_003957.1-743s1c1	TRCN0000196971	NM_003957	BRSK2	9024	homolog of SAD1|protein kinase SAD1B|serine/threonine kinase 29	CDS	GAAGTTCTTCCGGCAGATCAT	115.19	149.767	127.923	121.248	153.12	102.464
NM_003957.2-621s1c1	TRCN0000219670	NM_003957	BRSK2	9024	homolog of SAD1|protein kinase SAD1B|serine/threonine kinase 29	CDS	CTAAAGCTGCACGACGTTTAT	104.107	111.174	110.454	98.158	105.053	109.927
NM_003957.x-831s1c1	TRCN0000000739	NM_003957	BRSK2	9024	homolog of SAD1|protein kinase SAD1B|serine/threonine kinase 29	CDS	CTGGACGAGAAGAACAACATC	184.381	113.011	69.3751	190.392	118.613	49.7922
NM_003957.1-1037s1c1	TRCN0000199348	NM_003957	BRSK2	9024	homolog of SAD1|protein kinase SAD1B|serine/threonine kinase 29	CDS	CGATGACAACTTGCGACAGCT	101.398	139.015	210.08	89.8073	136.371	248.136
NM_003957.x-1367s1c1	TRCN0000000737	NM_003957	BRSK2	9024	homolog of SAD1|protein kinase SAD1B|serine/threonine kinase 29	CDS	GAACCAGGAGAAGATGATTTA	99.0652	113.243	120.125	109.807	150.254	146.955
NM_004725.2-709s21c1	TRCN0000230087	NM_004725	BUB3	9184	BUB3 budding uninhibited by benzimidazoles 3|budding uninhibited by benomyl|mitotic checkpoint component	CDS	GGTTATGTATTAAGCTCTATT	94.9408	139.597	164.084	73.9202	193.083	168.523
NM_004725.2-348s21c1	TRCN0000218450	NM_004725	BUB3	9184	BUB3 budding uninhibited by benzimidazoles 3|budding uninhibited by benomyl|mitotic checkpoint component	CDS	TGGAGGACTAGATCATCAATT	63.9816	81.4364	51.4132	49.5099	59.8967	32.5053
NM_004725.2-1005s21c1	TRCN0000230089	NM_004725	BUB3	9184	BUB3 budding uninhibited by benzimidazoles 3|budding uninhibited by benomyl|mitotic checkpoint component	CDS	TGCAATAGCGTCATCATATAT	99.5289	115.28	87.9102	78.3499	65.5449	64.8397
NM_004725.2-735s21c1	TRCN0000230088	NM_004725	BUB3	9184	BUB3 budding uninhibited by benzimidazoles 3|budding uninhibited by benomyl|mitotic checkpoint component	CDS	CCGAGTGGCAGTTGAGTATTT	68.6688	128.129	77.6014	54.7878	93.4373	63.6253
NM_004725.2-1997s21c1	TRCN0000230090	NM_004725	BUB3	9184	BUB3 budding uninhibited by benzimidazoles 3|budding uninhibited by benomyl|mitotic checkpoint component	3UTR	GACCAGCCGCTGGTGATTAAA	95.1227	161.563	88.5505	92.9584	188.829	85.4852
NM_144580.1-772s21c1	TRCN0000296036	NM_144580	C1orf85	112770	kidney predominant protein NCUG1	CDS	GCACTCCATCGACGATGAATA	68.3493	121.289	151.443	48.7255	110.996	157.103
NM_144580.1-1293s1c1	TRCN0000116122	NM_144580	C1orf85	112770	kidney predominant protein NCUG1	3UTR	TGGAGGTTGGAGCATCAAGTT	74.7349	53.204	58.7982	59.3003	59.3581	55.7334
NM_144580.1-932s21c1	TRCN0000288929	NM_144580	C1orf85	112770	kidney predominant protein NCUG1	CDS	CCTGCCTTAGCATACTCTCTT	93.1385	75.3215	52.0814	99.8446	79.3098	54.0153
NM_144580.1-457s21c1	TRCN0000308053	NM_144580	C1orf85	112770	kidney predominant protein NCUG1	CDS	TCCATACTCCTTGGCCGATTT	88.6513	89.0119	72.0357	82.6879	90.4048	58.641
NM_144580.1-415s1c1	TRCN0000116125	NM_144580	C1orf85	112770	kidney predominant protein NCUG1	CDS	CGTGTCCGATACGGCAGCAAA	180.967	120.172	130.812	390.236	194.384	144.415
NM_000719.3-6466s1c1	TRCN0000044677	NM_000719	CACNA1C	775	DHPR, alpha1 subunit|calcium channel, L type, alpha 1 polypeptide, isoform 1, cardic muscle|calcium channel, cardic dihydropyridinesensitive, alpha1 subunit|voltagedependent Ltype calcium channel alpha 1C subunit|voltagegated Ltype calcium channel Cav1.2	CDS	CGACATGACCATAGAGGAGAT	121.68	129.215	120.406	118.283	127.775	106.626
NM_000719.3-2438s1c1	TRCN0000044676	NM_000719	CACNA1C	775	DHPR, alpha1 subunit|calcium channel, L type, alpha 1 polypeptide, isoform 1, cardic muscle|calcium channel, cardic dihydropyridinesensitive, alpha1 subunit|voltagedependent Ltype calcium channel alpha 1C subunit|voltagegated Ltype calcium channel Cav1.2	CDS	CCAGGGATGTTAGTCTGTATT	139.644	160.932	211.351	164.63	202.316	222.302
NM_000719.3-5150s1c1	TRCN0000044674	NM_000719	CACNA1C	775	DHPR, alpha1 subunit|calcium channel, L type, alpha 1 polypeptide, isoform 1, cardic muscle|calcium channel, cardic dihydropyridinesensitive, alpha1 subunit|voltagedependent Ltype calcium channel alpha 1C subunit|voltagegated Ltype calcium channel Cav1.2	CDS	CGGAAGTTCAAGAAGCGCAAA	99.9996	111.334	65.7778	94.0662	113.407	46.4913
NM_000719.3-1822s1c1	TRCN0000044673	NM_000719	CACNA1C	775	DHPR, alpha1 subunit|calcium channel, L type, alpha 1 polypeptide, isoform 1, cardic muscle|calcium channel, cardic dihydropyridinesensitive, alpha1 subunit|voltagedependent Ltype calcium channel alpha 1C subunit|voltagegated Ltype calcium channel Cav1.2	CDS	CGCAGTCAAGTCTAATGTCTT	78.2831	98.5571	83.786	68.3041	94.8018	78.0655
NM_000719.3-3886s1c1	TRCN0000044675	NM_000719	CACNA1C	775	DHPR, alpha1 subunit|calcium channel, L type, alpha 1 polypeptide, isoform 1, cardic muscle|calcium channel, cardic dihydropyridinesensitive, alpha1 subunit|voltagedependent Ltype calcium channel alpha 1C subunit|voltagegated Ltype calcium channel Cav1.2	CDS	GCACCAGTACAAAGTGTGGTA	82.1005	113.127	54.5335	70.7675	101.864	49.6487
NM_005795.4-1017s21c1	TRCN0000356798	NM_005795	CALCRL	10203		CDS	CTTATCTCGCTTGGCATATTC	75.4998	85.9178	117.093	57.0967	78.6975	118.388
NM_005795.4-2306s21c1	TRCN0000356734	NM_005795	CALCRL	10203		3UTR	GGGCATGATTCTACCCTTATT	82.1024	85.4517	122.518	73.3899	72.092	114.686
NM_005795.4-1208s21c1	TRCN0000356736	NM_005795	CALCRL	10203		CDS	TTACCTGATGGGCTGTAATTA	91.425	116.13	93.7632	63.232	97.8828	87.3864
NM_005795.4-1360s21c1	TRCN0000356733	NM_005795	CALCRL	10203		CDS	CCATTGCTAGAAGCTTATATT	119.685	85.1133	173.912	122.906	71.8817	171.946
NM_005795.2-1447s1c1	TRCN0000008170	NM_005795	CALCRL	10203		CDS	CGTTCTCATCACCAAGTTAAA	118.389	89.8503	109.187	113.173	71.1244	79.6361
NM_005186.x-366s1c1	TRCN0000003562	NM_005186	CAPN1	823	calciumactivated neutral proteinase|calpain 1, large subunit|calpain, large polypeptide L1|cell proliferationinducing protein 30	CDS	CCCAATTCCTCCAAGACCTAT	133.012	121.641	89.3843	140.26	114.165	84.4945
NM_005186.x-1451s1c1	TRCN0000003559	NM_005186	CAPN1	823	calciumactivated neutral proteinase|calpain 1, large subunit|calpain, large polypeptide L1|cell proliferationinducing protein 30	CDS	CGACATGGAGACTATTGGCTT	127.431	129.22	79.1197	131.966	142.228	65.6392
NM_005186.x-1763s1c1	TRCN0000003558	NM_005186	CAPN1	823	calciumactivated neutral proteinase|calpain 1, large subunit|calpain, large polypeptide L1|cell proliferationinducing protein 30	CDS	AGAGGAGATTGACGAGAACTT	122.277	152.77	107.13	118.118	138.694	89.5843
NM_005186.x-2187s1c1	TRCN0000003560	NM_005186	CAPN1	823	calciumactivated neutral proteinase|calpain 1, large subunit|calpain, large polypeptide L1|cell proliferationinducing protein 30	CDS	CTAGAGACCATGTTCCGATTT	121.638	79.5567	87.2747	121.873	73.9853	82.7594
NM_005186.x-2895s1c1	TRCN0000003561	NM_005186	CAPN1	823	calciumactivated neutral proteinase|calpain 1, large subunit|calpain, large polypeptide L1|cell proliferationinducing protein 30	3UTR	AGGGACTTGTGTACTGGTTAT	80.7879	93.0309	112.963	67.6974	83.1993	85.9983
NM_031200.1-1376s21c1	TRCN0000356759	NM_031200	CCR9	10803	G proteincoupled receptor 28	3UTR	GGGATGAATCTGAACTATATG	60.0405	57.4404	35.4818	46.3412	33.6261	20.5609
NM_031200.1-1746s21c1	TRCN0000356758	NM_031200	CCR9	10803	G proteincoupled receptor 28	3UTR	TAACCCATGCCAGGTCTTATA	63.4517	94.2783	76.611	45.0789	79.3874	72.1849
NM_031200.1-1023s21c1	TRCN0000378213	NM_031200	CCR9	10803	G proteincoupled receptor 28	CDS	GTGCCGTTTCCACCAACATTG	118.109	101.947	75.7192	92.4159	110.478	72.3623
NM_031200.1-576s21c1	TRCN0000378216	NM_031200	CCR9	10803	G proteincoupled receptor 28	CDS	TCAGCGTGGACAGGTACATTG	89.4311	101.598	125.872	92.1353	124.171	161.241
NM_031200.1-355s1c1	TRCN0000008222	NM_031200	CCR9	10803	G proteincoupled receptor 28	CDS	CAGTCTTGTTATCCTTGTCTA	138.672	134.653	148.272	194.173	136.679	177.916
NM_001261.3-1737s21c1	TRCN0000342251	NM_001261	CDK9	1025	CDC2related kinase|cell division protein kinase 9|cyclindependent kinase 9 (CDC2related kinase)|serine/threonine protein kinase PITALRE	3UTR	GCACAGTTTGGTCCGTTAGAA	79.0914	78.9412	87.3654	64.3643	69.2469	87.6188
NM_001261.x-340s1c1	TRCN0000000498	NM_001261	CDK9	1025	CDC2related kinase|cell division protein kinase 9|cyclindependent kinase 9 (CDC2related kinase)|serine/threonine protein kinase PITALRE	CDS	TGATTGAGATTTGTCGAACCA	83.6108	77.8955	115.904	69.5538	65.2318	121.325
NM_001261.3-534s21c1	TRCN0000342323	NM_001261	CDK9	1025	CDC2related kinase|cell division protein kinase 9|cyclindependent kinase 9 (CDC2related kinase)|serine/threonine protein kinase PITALRE	CDS	CTACTACATCCACAGAAACAA	86.2415	114.733	136.81	96.5535	137.245	138.001
NM_001261.x-377s1c1	TRCN0000000496	NM_001261	CDK9	1025	CDC2related kinase|cell division protein kinase 9|cyclindependent kinase 9 (CDC2related kinase)|serine/threonine protein kinase PITALRE	CDS	CCGCTGCAAGGGTAGTATATA	84.5358	78.2866	68.6632	74.0421	76.5563	67.9272
NM_001261.3-565s21c1	TRCN0000342324	NM_001261	CDK9	1025	CDC2related kinase|cell division protein kinase 9|cyclindependent kinase 9 (CDC2related kinase)|serine/threonine protein kinase PITALRE	CDS	AGGGACATGAAGGCTGCTAAT	128.034	120.54	132.901	131.758	124.377	151.306
NM_001266.4-985s21c1	TRCN0000371770	NM_001266	CES1	1066	acyl coenzyme A:cholesterol acyltransferase|carboxylesterase 1|carboxylesterase 2 (liver)|cholesteryl ester hydrolase|egasyn|liver carboxylesterase|triacylglycerol hydrolase	CDS	GAGCTCTTGGAGACGACATTG	102.854	127.052	118.212	97.395	131.686	107.133
NM_001266.4-1481s21c1	TRCN0000371771	NM_001266	CES1	1066	acyl coenzyme A:cholesterol acyltransferase|carboxylesterase 1|carboxylesterase 2 (liver)|cholesteryl ester hydrolase|egasyn|liver carboxylesterase|triacylglycerol hydrolase	CDS	TGAAACCCAAGACGGTGATAG	103.606	93.8362	96.1264	95.6418	74.3429	86.0222
NM_001266.3-1744s1c1	TRCN0000046937	NM_001266	CES1	1066	acyl coenzyme A:cholesterol acyltransferase|carboxylesterase 1|carboxylesterase 2 (liver)|cholesteryl ester hydrolase|egasyn|liver carboxylesterase|triacylglycerol hydrolase	CDS	CCAGACAGAACACATAGAGCT	99.6647	98.7417	49.856	94.2392	82.9907	44.1553
NM_001266.4-1514s21c1	TRCN0000371769	NM_001266	CES1	1066	acyl coenzyme A:cholesterol acyltransferase|carboxylesterase 1|carboxylesterase 2 (liver)|cholesteryl ester hydrolase|egasyn|liver carboxylesterase|triacylglycerol hydrolase	CDS	ATGAGCTCTTCTCCGTCTTTG	93.7963	118.823	126.554	91.6444	131.583	129.308
NM_001266.3-1232s1c1	TRCN0000046935	NM_001266	CES1	1066	acyl coenzyme A:cholesterol acyltransferase|carboxylesterase 1|carboxylesterase 2 (liver)|cholesteryl ester hydrolase|egasyn|liver carboxylesterase|triacylglycerol hydrolase	CDS	TGCATTGCTAAGGAACTGATT	78.1952	88.5651	43.6657	64.7149	74.7547	28.1892
NM_018223.1-1888s1c1	TRCN0000007703	NM_018223	CHFR	55743		CDS	CGCCATGAAATTCAATCATAT	180.188	155.966	192.392	224.211	155.201	182.129
NM_018223.1-413s1c1	TRCN0000007705	NM_018223	CHFR	55743		CDS	GCATACCTCTATGAATCTTTA	99.5119	126.888	184.169	83.4965	112.617	165.61
NM_018223.1-1053s1c1	TRCN0000007704	NM_018223	CHFR	55743		CDS	GCAGTGAAGAAGATGTGCAAA	102.885	119.549	75.8171	111.107	127.331	82.4983
NM_018223.1-2974s1c1	TRCN0000007702	NM_018223	CHFR	55743		3UTR	CCTGTTATCCTTGTTTGTAAA	91.3726	108.946	66.7941	88.631	127.802	54.2353
NM_018223.1-1483s1c1	TRCN0000007706	NM_018223	CHFR	55743		CDS	GCAGCCTTTCTGCCACCTGTA	133.691	79.4185	108.84	179.89	86.3055	114.117
NM_019098.2-2048s1c1	TRCN0000044231	NM_019098	CNGB3	54714	cone photoreceptor cGMPgated cation channel betasubunit|cyclic nucleotidegated cation channel modulatory subunit	CDS	CCGAAAGAAGAGACACCCAAA	124.687	82.118	112.924	120.452	143.573	100.089
NM_019098.2-772s1c1	TRCN0000044228	NM_019098	CNGB3	54714	cone photoreceptor cGMPgated cation channel betasubunit|cyclic nucleotidegated cation channel modulatory subunit	CDS	CCCATATCAAACCGCAGACAA	55.1572	96.319	63.9307	52.2811	104.358	72.9551
NM_019098.2-902s1c1	TRCN0000044232	NM_019098	CNGB3	54714	cone photoreceptor cGMPgated cation channel betasubunit|cyclic nucleotidegated cation channel modulatory subunit	CDS	GATTCAAATGAGCTAAGGAAA	69.2392	129.092	77.852	60.648	113.85	75.6549
NM_019098.2-1685s1c1	TRCN0000044229	NM_019098	CNGB3	54714	cone photoreceptor cGMPgated cation channel betasubunit|cyclic nucleotidegated cation channel modulatory subunit	CDS	CCTGGTGACTTTGTCTGCAAA	47.8943	123.227	76.1193	38.3997	138.009	64.0456
NM_019098.2-1918s1c1	TRCN0000044230	NM_019098	CNGB3	54714	cone photoreceptor cGMPgated cation channel betasubunit|cyclic nucleotidegated cation channel modulatory subunit	CDS	CCAAGAAATTCTAGTGCATTA	50.8479	124.682	104.141	40.4914	97.8426	106.568
NM_004766.2-367s21c1	TRCN0000286459	NM_004766	COPB2	9276	betaprimeCOP|coatomer binding complex, beta prime subunit	CDS	GCAGATTAGAGTGTTCAATTA	139.431	23.2312	102.17	181.418	32.288	126.196
NM_004766.2-1565s21c1	TRCN0000293894	NM_004766	COPB2	9276	betaprimeCOP|coatomer binding complex, beta prime subunit	CDS	ATTGCTACTGAGGAATCATTT	108.739	16.0186	164.514	121.851	16.728	187.365
NM_004766.2-166s21c1	TRCN0000293938	NM_004766	COPB2	9276	betaprimeCOP|coatomer binding complex, beta prime subunit	CDS	TGCTAGATCTGATCGAGTTAA	156.863	29.5304	106.877	196.613	26.8927	132.44
NM_004766.1-1257s1c1	TRCN0000065115	NM_004766	COPB2	9276	betaprimeCOP|coatomer binding complex, beta prime subunit	CDS	GCCCACGATTCTTCAGAGTAT	158.201	138.202	116.754	179.173	176.799	135.794
NM_004766.2-2871s21c1	TRCN0000293939	NM_004766	COPB2	9276	betaprimeCOP|coatomer binding complex, beta prime subunit	3UTR	CCTGACTAAACAGATCATTAT	153.314	6.31263	111.054	237.103	5.073	127.931
NM_001861.2-483s21c1	TRCN0000232554	NM_001861	COX4I1	1327		CDS	GCCATGTTCTTCATCGGTTTC	168.284	192.83	242.125	172.854	207.921	200.624
NM_001861.2-398s21c1	TRCN0000232553	NM_001861	COX4I1	1327		CDS	AGTCGAGTTGTATCGCATTAA	196.865	251.976	287.503	209.391	273.86	285.245
NM_001861.2-482s1c1	TRCN0000046291	NM_001861	COX4I1	1327		CDS	TGCCATGTTCTTCATCGGTTT	156.258	122.64	126.737	169.488	114.288	119.196
NM_001861.2-190s21c1	TRCN0000232551	NM_001861	COX4I1	1327		CDS	TAGTTGGCAAGCGAGCAATTT	82.2039	99.9149	81.2013	89.8211	102.603	71.4752
NM_001861.2-221s21c1	TRCN0000232552	NM_001861	COX4I1	1327		CDS	GTGTGTACGAGCTCATGAAAG	137.901	149.675	178.49	121.87	167.667	218.364
NM_001863.3-275s21c1	TRCN0000304049	NM_001863	COX6B1	1340	cytochrome c oxidase subunit VIb|human cytochrome oxidase subunit VIb	CDS	ACCGCTGTCAGAAGGCAATGA	196.068	129.918	172.913	258.942	140.342	212.456
NM_001863.3-308s21c1	TRCN0000300409	NM_001863	COX6B1	1340	cytochrome c oxidase subunit VIb|human cytochrome oxidase subunit VIb	CDS	GCGATATCTCTGTGTGCGAAT	110.674	138.439	201.75	110.477	135.341	185.613
NM_001863.3-404s21c1	TRCN0000310803	NM_001863	COX6B1	1340	cytochrome c oxidase subunit VIb|human cytochrome oxidase subunit VIb	CDS	CGTTTCCCGGGAAGATCTGAA	96.4159	108.33	110.905	90.617	116.821	107.664
NM_001863.3-252s21c1	TRCN0000300342	NM_001863	COX6B1	1340	cytochrome c oxidase subunit VIb|human cytochrome oxidase subunit VIb	CDS	CTGGCAGAACTACCTGGACTT	64.9666	76.1676	56.2454	58.8411	71.4826	69.0766
NM_001863.3-240s21c1	TRCN0000304050	NM_001863	COX6B1	1340	cytochrome c oxidase subunit VIb|human cytochrome oxidase subunit VIb	CDS	GACTAGAAACTGCTGGCAGAA	77.6033	108.234	61.0267	68.9164	114.067	51.9123
NM_004374.2-106s21c1	TRCN0000310623	NM_004374	COX6C	1345	cytochrome c oxidase subunit VIc preprotein	CDS	GCCAGGCGTCTGCGAAATCAT	137.903	173.127	217.786	144.772	184.883	238.009
NM_004374.2-194s21c1	TRCN0000303979	NM_004374	COX6C	1345	cytochrome c oxidase subunit VIc preprotein	CDS	GAAAGAAGGCATACGCAGATT	90.0282	163.118	177.787	75.1166	165.965	204.068
NM_004374.2-273s21c1	TRCN0000303978	NM_004374	COX6C	1345	cytochrome c oxidase subunit VIc preprotein	CDS	TCAGAGTGTAAAGTAATCTTG	71.8838	117.156	70.9056	56.8067	123.888	59.3975
NM_004374.2-262s21c1	TRCN0000300407	NM_004374	COX6C	1345	cytochrome c oxidase subunit VIc preprotein	CDS	GCTGGTATCTTTCAGAGTGTA	92.6354	138.183	114.737	86.7903	161	117.472
NM_004374.2-174s21c1	TRCN0000331279	NM_004374	COX6C	1345	cytochrome c oxidase subunit VIc preprotein	CDS	GTTTCGTGTGGCTGATCAAAG	166.712	157.827	231.014	156.349	176.548	236.59
NM_015974.1-834s1c1	TRCN0000064939	NM_015974	CRYL1	51084	Lgulonate 3dehydrogenase|crystallin, lamda 1|lambdacrystallin|lambdacrystallin homolog	CDS	GCATCTCAATGCAGAAGGTAT	56.6905	39.1874	90.5187	45.9109	52.6776	87.1293
NM_015974.1-343s1c1	TRCN0000064941	NM_015974	CRYL1	51084	Lgulonate 3dehydrogenase|crystallin, lamda 1|lambdacrystallin|lambdacrystallin homolog	CDS	CCCAATATCCAAGAAGCAGTA	95.2646	108.198	90.7378	89.0764	100.937	76.0599
NM_015974.1-699s1c1	TRCN0000064942	NM_015974	CRYL1	51084	Lgulonate 3dehydrogenase|crystallin, lamda 1|lambdacrystallin|lambdacrystallin homolog	CDS	GCCTGCAATATGCAATCATCA	124.365	76.7253	113.661	128.962	62.02	102.113
NM_015974.1-198s1c1	TRCN0000064940	NM_015974	CRYL1	51084	Lgulonate 3dehydrogenase|crystallin, lamda 1|lambdacrystallin|lambdacrystallin homolog	CDS	CCAGGTGAAACTCTATGACAT	125.026	143.315	175.222	109.851	143.781	172.04
NM_015974.1-473s1c1	TRCN0000064938	NM_015974	CRYL1	51084	Lgulonate 3dehydrogenase|crystallin, lamda 1|lambdacrystallin|lambdacrystallin homolog	CDS	CCACTTCTTGTCTCATGCCTT	119.967	133.113	127.284	105.145	107.691	99.5486
NM_001323.x-423s1c1	TRCN0000003600	NM_001323	CST6	1474	cystatin 6|cystatin M|cystatin M/E|cysteine proteinase inhibitor	CDS	GCTGCGCTGTGACTTTGAGGT	125.118	78.769	68.9438	119.092	55.7173	59.1306
NM_001323.x-252s1c1	TRCN0000003602	NM_001323	CST6	1474	cystatin 6|cystatin M|cystatin M/E|cysteine proteinase inhibitor	CDS	CTACTACTTCCGAGACACGCA	144.942	151.252	121.496	160.284	212.062	140.881
NM_001323.x-258s1c1	TRCN0000010802	NM_001323	CST6	1474	cystatin 6|cystatin M|cystatin M/E|cysteine proteinase inhibitor	CDS	CTTCCGAGACACGCACATCAT	99.4112	103.693	41.6406	83.6984	84.6015	33.5762
NM_001323.x-261s1c1	TRCN0000010803	NM_001323	CST6	1474	cystatin 6|cystatin M|cystatin M/E|cysteine proteinase inhibitor	CDS	CCGAGACACGCACATCATCAA	196.94	89.1311	29.2643	219.804	60.0097	19.5849
NM_001323.x-245s1c1	TRCN0000003601	NM_001323	CST6	1474	cystatin 6|cystatin M|cystatin M/E|cysteine proteinase inhibitor	CDS	ACAGCATCTACTACTTCCGAG	94.8727	91.3358	67.4032	89.309	86.0323	55.5461
NM_004079.3-180s21c1	TRCN0000297263	NM_004079	CTSS	1520		CDS	CACAGTTGCATAAAGATCCTA	104.483	80.7056	107.761	84.0453	67.9231	101.316
NM_004079.x-984s1c1	TRCN0000003694	NM_004079	CTSS	1520		CDS	GCTATGGTGATCTTAATGGGA	109.018	87.1594	115.645	103.586	77.367	95.2878
NM_004079.3-3537s21c1	TRCN0000297264	NM_004079	CTSS	1520		3UTR	CAGCACTTTGACATATTGAAT	80.2607	91.6822	117.39	63.9199	78.9006	111.505
NM_004079.3-695s21c1	TRCN0000279838	NM_004079	CTSS	1520		CDS	GCTTTCCAGTACATCATTGAT	93.234	69.5112	70.2368	62.3333	52.9502	56.2506
NM_004079.x-447s1c1	TRCN0000003692	NM_004079	CTSS	1520		CDS	TCACATATAAGTCAAACCCTA	57.0592	94.0779	108.429	44.0033	94.3175	137.052
NM_005231.2-762s1c1	TRCN0000040273	NM_005231	CTTN	2017	1110020L01Rik|ems1 sequence (mammary tumor and squamous cell carcinomaassociated (p80/85 src substrate)|oncogene EMS1	CDS	CGGCAAATACGGTATCGACAA	97.9251	56.7355	139.796	80.5647	82.4547	140.742
NM_005231.3-1249s21c1	TRCN0000294181	NM_005231	CTTN	2017	1110020L01Rik|ems1 sequence (mammary tumor and squamous cell carcinomaassociated (p80/85 src substrate)|oncogene EMS1	CDS	GTAACATCAGAGCTAACTTTG	165.994	75.1036	148.034	231.739	99.0158	195.088
NM_005231.3-2049s21c1	TRCN0000294182	NM_005231	CTTN	2017	1110020L01Rik|ems1 sequence (mammary tumor and squamous cell carcinomaassociated (p80/85 src substrate)|oncogene EMS1	3UTR	CCACAGAATTTGCTAATATAT	47.5885	32.4758	52.9072	58.0865	65.3009	69.5457
NM_005231.2-627s1c1	TRCN0000040276	NM_005231	CTTN	2017	1110020L01Rik|ems1 sequence (mammary tumor and squamous cell carcinomaassociated (p80/85 src substrate)|oncogene EMS1	CDS	GAAAGACTACTCCAGTGGTTT	73.5628	144.373	77.0465	60.0657	88.3469	64.3843
NM_005231.3-510s21c1	TRCN0000298256	NM_005231	CTTN	2017	1110020L01Rik|ems1 sequence (mammary tumor and squamous cell carcinomaassociated (p80/85 src substrate)|oncogene EMS1	CDS	CACGAATATCAGTCGAAACTT	60.8154	113.264	104.857	56.8141	120.423	126.169
NM_153611.2-535s1c1	TRCN0000064658	NM_153611	CYBASC3	220002		CDS	CCTCTTCACTATCTACTGGAT	114.93	77.6178	133.393	84.5703	87.5102	118.579
NM_153611.2-978s1c1	TRCN0000064661	NM_153611	CYBASC3	220002		CDS	CATCCGTCATTTCGGGCATTA	141.409	131.267	164.895	133.627	112.892	169.737
NM_153611.2-764s1c1	TRCN0000064662	NM_153611	CYBASC3	220002		CDS	CTGGTTGCTGTCTTTACGTTT	104.406	84.3727	86.2027	91.9216	115.507	75.3143
NM_153611.2-990s1c1	TRCN0000064659	NM_153611	CYBASC3	220002		CDS	CGGGCATTAATGAGAAGCTTT	62.4522	127.694	100.396	45.4572	85.9761	93.9863
NM_153611.2-1123s1c1	TRCN0000064660	NM_153611	CYBASC3	220002		CDS	CCTTCTGGCTTCATCTTGGAA	100.025	101.531	90.3006	90.7435	91.5197	83.36
NM_023944.1-1524s1c1	TRCN0000064285	NM_023944	CYP4F12	66002	cytochrome P450, subfamily IVF, polypeptide 12	CDS	CCGCAGGAAGCTGGAATTGAT	101.016	151.776	159.755	115.96	180.674	158.804
NM_023944.1-524s1c1	TRCN0000064284	NM_023944	CYP4F12	66002	cytochrome P450, subfamily IVF, polypeptide 12	CDS	CGATCTTCAACAAGAGTGCAA	59.813	163.75	115.111	57.3282	143.085	118.912
NM_023944.1-376s1c1	TRCN0000064286	NM_023944	CYP4F12	66002	cytochrome P450, subfamily IVF, polypeptide 12	CDS	GCCATTGCACCCAAGGATAAT	58.4839	106.758	109.274	58.0763	102.069	100.758
NM_023944.1-1124s1c1	TRCN0000064287	NM_023944	CYP4F12	66002	cytochrome P450, subfamily IVF, polypeptide 12	CDS	GCGATCCTAAAGAGATTGAAT	93.4706	97.3253	88.7494	79.2566	93.9315	84.2224
NM_023944.1-964s1c1	TRCN0000064283	NM_023944	CYP4F12	66002	cytochrome P450, subfamily IVF, polypeptide 12	CDS	GCATTGTCAGATGAGGATATA	106.365	121.267	86.079	91.2728	121.772	63.7558
NM_004395.2-649s1c1	TRCN0000063958	NM_004395	DBN1	1627	drebrin E|drebrin E2|drebrin1	CDS	CTGTGGAAATGAAGCGGATTA	183.023	194.207	109.432	183.434	178.397	71.8574
NM_004395.2-1998s1c1	TRCN0000063959	NM_004395	DBN1	1627	drebrin E|drebrin E2|drebrin1	CDS	CCTGTGTTCTACAACAAGCCT	74.931	105.416	81.1932	62.679	94.7852	76.0866
NM_004395.2-1941s1c1	TRCN0000063962	NM_004395	DBN1	1627	drebrin E|drebrin E2|drebrin1	CDS	CAATCACAGGAGGAGGAGTTT	99.6103	97.0823	119.765	87.2074	76.4322	131.463
NM_004395.2-231s1c1	TRCN0000063961	NM_004395	DBN1	1627	drebrin E|drebrin E2|drebrin1	CDS	GCTCTGTACACATATGAAGAT	66.6235	117.22	89.5847	56.2288	96.6717	70.6679
NM_004395.2-903s1c1	TRCN0000063960	NM_004395	DBN1	1627	drebrin E|drebrin E2|drebrin1	CDS	CAGTCTATCTTTGGTGACCAT	115.794	127.999	111.41	125.338	128.294	123.533
NM_014063.6-1732s21c1	TRCN0000294453	NM_014063	DBNL	28988	src homology 3 domaincontaining protein HIP55	3UTR	TCTGGCTGCCTTCTGCATTTA	110.03	99.1658	68.0033	88.6794	75.5416	41.846
NM_014063.6-314s21c1	TRCN0000294405	NM_014063	DBNL	28988	src homology 3 domaincontaining protein HIP55	CDS	CAACTCTGGACTGCCCAAATT	141.276	119.944	53.3432	121.957	105.26	43.6528
NM_014063.6-592s21c1	TRCN0000294454	NM_014063	DBNL	28988	src homology 3 domaincontaining protein HIP55	CDS	CCAATGCCGTGTCTGAGATTA	71.4031	106.124	54.0873	62.9584	97.9391	38.8778
NM_014063.6-1257s21c1	TRCN0000286996	NM_014063	DBNL	28988	src homology 3 domaincontaining protein HIP55	CDS	GACGACACAGAGATCTCCTTT	96.1307	111.83	88.6169	83.1574	104.064	79.7881
NM_014063.6-470s21c1	TRCN0000286997	NM_014063	DBNL	28988	src homology 3 domaincontaining protein HIP55	CDS	GCCTGAGTGCATCATGGAGAA	100.441	87.1929	66.7941	74.6806	66.8074	50.4927
NM_001920.3-1290s1c1	TRCN0000058557	NM_001920	DCN	1634	bone proteoglycan II|decorin proteoglycan|dermatan sulphate proteoglycans II|proteoglycan core protein|small leucinerich protein 1B	CDS	CCAGGTTGTCTACCTTCATAA	176.865	85.3746	139.241	194.794	121.399	139.224
NM_001920.3-460s1c1	TRCN0000058556	NM_001920	DCN	1634	bone proteoglycan II|decorin proteoglycan|dermatan sulphate proteoglycans II|proteoglycan core protein|small leucinerich protein 1B	CDS	CCGTTTCAACAGAGAGGCTTA	140.904	143.1	149.976	142.722	110.94	138.01
NM_001920.3-805s1c1	TRCN0000058554	NM_001920	DCN	1634	bone proteoglycan II|decorin proteoglycan|dermatan sulphate proteoglycans II|proteoglycan core protein|small leucinerich protein 1B	CDS	CGACTTTATCTGTCCAAGAAT	125.437	75.9984	130.682	147.67	105.048	139.072
NM_001920.3-1462s1c1	TRCN0000058555	NM_001920	DCN	1634	bone proteoglycan II|decorin proteoglycan|dermatan sulphate proteoglycans II|proteoglycan core protein|small leucinerich protein 1B	CDS	GCCATTCAACTCGGAAACTAT	152.337	104.48	124.749	148.659	108.395	110.988
NM_001920.3-1925s1c1	TRCN0000058553	NM_001920	DCN	1634	bone proteoglycan II|decorin proteoglycan|dermatan sulphate proteoglycans II|proteoglycan core protein|small leucinerich protein 1B	3UTR	GCCTCATTTGAATGTGTGAAT	90.6916	128.841	119.178	84.8059	104.943	114.025
NM_012137.2-662s1c1	TRCN0000051864	NM_012137	DDAH1	23576	NG, NGdimethylarginine dimethylaminohydrolase	CDS	GTCTAGTGAATCTGCACAGAA	109.756	102.504	95.2799	113.104	93.2423	120.116
NM_012137.3-940s21c1	TRCN0000300840	NM_012137	DDAH1	23576	NG, NGdimethylarginine dimethylaminohydrolase	CDS	TGAGCATGTCTGAACTGGAAA	81.8606	125.36	67.5831	60.764	105.02	53.2189
NM_012137.3-613s21c1	TRCN0000300763	NM_012137	DDAH1	23576	NG, NGdimethylarginine dimethylaminohydrolase	CDS	CTGAAATCTTGGCTGATACTT	59.2654	95.2618	130.783	42.819	91.6397	137.542
NM_012137.2-434s1c1	TRCN0000051863	NM_012137	DDAH1	23576	NG, NGdimethylarginine dimethylaminohydrolase	CDS	GCTCAATATAGTAGAGATGAA	97.8094	107.424	85.4367	86.7645	114.71	91.024
NM_012137.3-752s21c1	TRCN0000300762	NM_012137	DDAH1	23576	NG, NGdimethylarginine dimethylaminohydrolase	CDS	CCTTAAGATCATGCAACAGAT	114.317	100.991	94.4653	131.777	106.213	87.4798
NM_004080.1-451s1c1	TRCN0000196692	NM_004080	DGKB	1607	DAG kinase beta|diacylglycerol kinase, beta|diacylglycerol kinase, beta (90kD)|diglyceride kinase beta	CDS	GAGGATAAGCTTGAGTTTATG	138.326	128.92	148.793	141.227	101.294	156.111
NM_004080.1-2632s1c1	TRCN0000194940	NM_004080	DGKB	1607	DAG kinase beta|diacylglycerol kinase, beta|diacylglycerol kinase, beta (90kD)|diglyceride kinase beta	3UTR	CCTGAAGTGATACTGCATATT	138.471	102.939	60.5649	127.25	123.817	44.8766
NM_004080.1-2039s1c1	TRCN0000199895	NM_004080	DGKB	1607	DAG kinase beta|diacylglycerol kinase, beta|diacylglycerol kinase, beta (90kD)|diglyceride kinase beta	CDS	GACGAAGCCATCGACGAATAG	87.2189	140.083	114.498	76.8113	119.413	136.537
NM_004080.x-2181s1c1	TRCN0000000768	NM_004080	DGKB	1607	DAG kinase beta|diacylglycerol kinase, beta|diacylglycerol kinase, beta (90kD)|diglyceride kinase beta	CDS	GCAAATATACACAGGCCTGAA	116.569	130.73	78.0711	100.961	119.562	58.3759
NM_004080.x-1895s1c1	TRCN0000000766	NM_004080	DGKB	1607	DAG kinase beta|diacylglycerol kinase, beta|diacylglycerol kinase, beta (90kD)|diglyceride kinase beta	CDS	CCTGCAAGAAGCTACATGAAT	113.47	122.933	88.4872	107.712	110.22	83.0795
NM_020162.2-1039s21c1	TRCN0000310442	NM_020162	DHX33	56919	DEAD/H (AspGluAlaAsp/His) box polypeptide 33	CDS	GCTATCGCAAAGTGATCATTT	111.001	93.5305	121.797	126.962	98.1105	151.023
NM_020162.2-585s21c1	TRCN0000303663	NM_020162	DHX33	56919	DEAD/H (AspGluAlaAsp/His) box polypeptide 33	CDS	GAAGCTCACGAACGGACTATC	104.921	156.771	85.1663	80.9766	108.31	71.8574
NM_020162.2-1110s21c1	TRCN0000303661	NM_020162	DHX33	56919	DEAD/H (AspGluAlaAsp/His) box polypeptide 33	CDS	GTTGACACGGGCATGGTTAAA	111.542	108.901	72.2138	91.7708	88.6782	57.5837
NM_020162.2-2242s21c1	TRCN0000303662	NM_020162	DHX33	56919	DEAD/H (AspGluAlaAsp/His) box polypeptide 33	3UTR	TGACTTCCAGGAGCGTGAAAG	65.2115	88.8102	101.112	60.7045	75.8247	94.3252
NM_020162.2-1252s21c1	TRCN0000303729	NM_020162	DHX33	56919	DEAD/H (AspGluAlaAsp/His) box polypeptide 33	CDS	TCTACACGGAGGACGAGTTTG	135.649	125.14	134.393	168.208	165.256	146.53
NM_198963.1-323s21c1	TRCN0000241884	NM_198963	DHX57	90957	DEAHbox RNA/DNA helicase AAM73547	CDS	GACCTAGCAACAGTAACATAA	71.9304	131.494	91.3684	60.9971	151.828	108.779
NM_198963.1-2254s21c1	TRCN0000241887	NM_198963	DHX57	90957	DEAHbox RNA/DNA helicase AAM73547	CDS	ACTATACCAGGTCGTACATTT	88.4967	85.889	146.061	72.8552	83.6629	171.64
NM_144995.2-540s1c1	TRCN0000073052	NM_144995	DHX57	90957	DEAHbox RNA/DNA helicase AAM73547	CDS	GCATCACTAGAGCATCTCCTT	97.602	92.6114	92.6178	93.8574	82.4521	84.0933
NM_144995.2-1096s1c1	TRCN0000073050	NM_144995	DHX57	90957	DEAHbox RNA/DNA helicase AAM73547	CDS	CCTTGACATTTGCGGAAACTT	112.386	79.2246	102.742	114.651	75.7123	100.742
NM_198963.1-3598s21c1	TRCN0000241886	NM_198963	DHX57	90957	DEAHbox RNA/DNA helicase AAM73547	CDS	ACGGAACTGTTATCGGATATA	96.4937	80.7854	81.7827	80.9555	81.6853	70.746
NM_001931.2-404s1c1	TRCN0000035920	NM_001931	DLAT	1737	70 kDa mitochondrial autoantigen of primary biliary cirrhosis|E2 component of pyruvate dehydrogenase complex|M2 antigen complex 70 kDa subunit|dihydrolipoamide Sacetyltransferase (E2 component of pyruvate dehydrogenase complex)	CDS	GCAGAGGTTGAAACTGATAAA	126.519	129.025	113.619	120.48	113.997	109.712
NM_001931.3-1984s21c1	TRCN0000290473	NM_001931	DLAT	1737	70 kDa mitochondrial autoantigen of primary biliary cirrhosis|E2 component of pyruvate dehydrogenase complex|M2 antigen complex 70 kDa subunit|dihydrolipoamide Sacetyltransferase (E2 component of pyruvate dehydrogenase complex)	CDS	CCATACCTCATTATTACCTTT	171.994	158.627	188.627	183.937	149.801	151.009
NM_001931.3-1582s21c1	TRCN0000296580	NM_001931	DLAT	1737	70 kDa mitochondrial autoantigen of primary biliary cirrhosis|E2 component of pyruvate dehydrogenase complex|M2 antigen complex 70 kDa subunit|dihydrolipoamide Sacetyltransferase (E2 component of pyruvate dehydrogenase complex)	CDS	CAACCGAAGTAACAGATTTAA	126.433	161.116	154.004	126.947	203.107	153.9
NM_001931.3-1949s21c1	TRCN0000296579	NM_001931	DLAT	1737	70 kDa mitochondrial autoantigen of primary biliary cirrhosis|E2 component of pyruvate dehydrogenase complex|M2 antigen complex 70 kDa subunit|dihydrolipoamide Sacetyltransferase (E2 component of pyruvate dehydrogenase complex)	CDS	GGTTATTGCACAGCGATTAAT	236.942	157.259	132.269	298.626	149.633	98.1444
NM_001931.3-2717s21c1	TRCN0000296578	NM_001931	DLAT	1737	70 kDa mitochondrial autoantigen of primary biliary cirrhosis|E2 component of pyruvate dehydrogenase complex|M2 antigen complex 70 kDa subunit|dihydrolipoamide Sacetyltransferase (E2 component of pyruvate dehydrogenase complex)	3UTR	GAGTCTGTCCAGATAAGTTAT	83.1855	84.211	97.1493	67.7343	66.1597	90.5097
NM_181581.1-631s1c1	TRCN0000064853	NM_181581	DUS4L	11062	2310069P03Rik|dihydrouridine synthase 4like|protein similar to E.coli yhdg and R. capsulatus nifR3	CDS	GCTCGTATAGTCTGTCCTTAT	95.0727	104.285	133.838	99.1964	107.815	149.652
NM_181581.1-598s1c1	TRCN0000064857	NM_181581	DUS4L	11062	2310069P03Rik|dihydrouridine synthase 4like|protein similar to E.coli yhdg and R. capsulatus nifR3	CDS	GCTGCTAACGATGCAAGACTT	92.1808	60.4658	96.1624	89.2269	55.4124	112.585
NM_181581.1-502s21c1	TRCN0000315881	NM_181581	DUS4L	11062	2310069P03Rik|dihydrouridine synthase 4like|protein similar to E.coli yhdg and R. capsulatus nifR3	CDS	CCAATGATTGTTGCCGCTGAT	62.2256	127.587	71.3167	51.5522	131.296	64.59
NM_181581.1-1241s21c1	TRCN0000333715	NM_181581	DUS4L	11062	2310069P03Rik|dihydrouridine synthase 4like|protein similar to E.coli yhdg and R. capsulatus nifR3	CDS	GCACATCAGCAATCATAGATT	98.9079	112.374	53.3274	81.1516	122.724	47.1642
NM_181581.1-429s1c1	TRCN0000064856	NM_181581	DUS4L	11062	2310069P03Rik|dihydrouridine synthase 4like|protein similar to E.coli yhdg and R. capsulatus nifR3	CDS	CCCAATGGTTCGATATTCAAA	71.1495	134.844	86.6133	45.9793	128.091	82.1635
NM_007240.1-694s21c1	TRCN0000231611	NM_007240	DUSP12	11266	YVH1 proteintyrosine phosphatase (S. cerevisiae) ortholog|serine/threonine specific protein phosphatase	CDS	TATTTCGAAGTTCTAGTATTC	102.092	75.2738	137.149	74.1087	89.0443	131.634
NM_007240.1-795s21c1	TRCN0000355652	NM_007240	DUSP12	11266	YVH1 proteintyrosine phosphatase (S. cerevisiae) ortholog|serine/threonine specific protein phosphatase	CDS	CAAGCTCAATGTACATCTTAT	119.725	53.4589	40.9977	95.7858	47.9379	26.2813
NM_007240.1-370s21c1	TRCN0000231609	NM_007240	DUSP12	11266	YVH1 proteintyrosine phosphatase (S. cerevisiae) ortholog|serine/threonine specific protein phosphatase	CDS	GTCGAAGTGTGGCCATAATAA	164.671	184.304	100.033	191.354	210.55	99.7549
NM_007240.1-723s21c1	TRCN0000231612	NM_007240	DUSP12	11266	YVH1 proteintyrosine phosphatase (S. cerevisiae) ortholog|serine/threonine specific protein phosphatase	CDS	CGTGAAGGAAGTGGACCTATA	74.1332	139.918	87.3126	63.8827	103.374	66.8132
NM_007240.1-525s21c1	TRCN0000368302	NM_007240	DUSP12	11266	YVH1 proteintyrosine phosphatase (S. cerevisiae) ortholog|serine/threonine specific protein phosphatase	CDS	GTGGATACCTCTAGTGCAATT	101.43	149.773	109.168	100.121	138.274	115.239
NM_003797.2-1124s21c1	TRCN0000381832	NM_003797	EED	8726	WD protein associating with integrin cytoplasmic tails 1	CDS	GACACTCTGGTGGCAATATTT	151.6	78.5802	115.374	203.17	162.823	127.897
NM_003797.2-1391s21c1	TRCN0000381067	NM_003797	EED	8726	WD protein associating with integrin cytoplasmic tails 1	CDS	GTGCGATGGTTAGGCGATTTG	101.414	106.999	134.971	103.576	150.059	147.201
NM_003797.2-1722s21c1	TRCN0000276501	NM_003797	EED	8726	WD protein associating with integrin cytoplasmic tails 1	CDS	GCAGCATTCTTATAGCTGTTT	45.4411	75.1036	84.504	44.9601	68.6252	120.742
NM_003797.2-1359s1c1	TRCN0000021205	NM_003797	EED	8726	WD protein associating with integrin cytoplasmic tails 1	CDS	CCAGAGACATACATAGGAATT	76.034	126.915	95.438	78.2375	112.362	118.988
NM_003797.2-1491s1c1	TRCN0000021208	NM_003797	EED	8726	WD protein associating with integrin cytoplasmic tails 1	CDS	CCAGTGAATCTAATGTGACTA	67.9076	63.1519	57.1194	61.9316	50.4164	36.3721
NM_015252.2-3985s1c1	TRCN0000034298	NM_015252	EHBP1	23301	EH domainbinding protein 1|NPF/calponinlike protein	CDS	CCGAAGAAGAAGATGAGCATT	101.486	83.6876	113.125	90.0104	72.2013	114.055
NM_015252.2-486s1c1	TRCN0000034296	NM_015252	EHBP1	23301	EH domainbinding protein 1|NPF/calponinlike protein	CDS	CCAGATAAACTGGTGGTAGTT	102.791	130.354	120.041	90.1506	149.256	124.115
NM_015252.2-4761s1c1	TRCN0000034294	NM_015252	EHBP1	23301	EH domainbinding protein 1|NPF/calponinlike protein	3UTR	CCAGTTTACAAAGACAGTCTT	76.5486	104.953	94.6551	59.0582	68.7733	75.2033
NM_015252.2-2596s1c1	TRCN0000034297	NM_015252	EHBP1	23301	EH domainbinding protein 1|NPF/calponinlike protein	CDS	CCAGATCCTTAGAATGCAGAT	128.944	131.393	86.3015	116.521	157.036	80.7535
NM_015252.2-3759s1c1	TRCN0000034295	NM_015252	EHBP1	23301	EH domainbinding protein 1|NPF/calponinlike protein	CDS	GCCTTAATAAGGAGAATGAAT	89.5967	92.6692	80.5327	73.9732	80.3986	72.1969
NM_024757.3-653s21c1	TRCN0000217965	NM_024757	EHMT1	79813	G9a like protein|euchromatic histone methyltransferase 1	CDS	TCGAGAAGCTAGAGATCATAA	155.974	137.088	192.206	147.234	140.796	181.025
NM_024757.3-3499s21c1	TRCN0000218919	NM_024757	EHMT1	79813	G9a like protein|euchromatic histone methyltransferase 1	CDS	ACCTCTTTGATCTCGACAATA	123.089	112.22	112.194	101.951	101.308	92.7393
NM_024757.3-346s1c1	TRCN0000036056	NM_024757	EHMT1	79813	G9a like protein|euchromatic histone methyltransferase 1	CDS	GCAACGGATACATCTTAAATA	111.605	109.459	83.2065	90.5861	96.7676	59.0375
NM_024757.3-2864s21c1	TRCN0000229326	NM_024757	EHMT1	79813	G9a like protein|euchromatic histone methyltransferase 1	CDS	GGATTCAGATGTCACCTTAAA	127.035	86.3234	83.6519	149.296	115.504	94.7217
NM_024757.3-1346s21c1	TRCN0000229325	NM_024757	EHMT1	79813	G9a like protein|euchromatic histone methyltransferase 1	CDS	CCTCGGTTCTGAGTCGTATAA	62.5992	83.4334	67.4213	48.3745	72.1157	54.9404
NM_001412.2-285s1c1	TRCN0000062622	NM_001412	EIF1AX	1964	Putative eukaryotic translation initiation factor 1A|Xlinked eukaryotic translation initiation factor 1A|eukaryotic translation initiation factor 1A, X chromosome|eukaryotic translation initiation factor 4C	CDS	CAAAGAGGATGGTCAGGAGTA	98.1249	122.393	122.341	108.827	115.091	186.29
NM_001412.2-335s1c1	TRCN0000062619	NM_001412	EIF1AX	1964	Putative eukaryotic translation initiation factor 1A|Xlinked eukaryotic translation initiation factor 1A|eukaryotic translation initiation factor 1A, X chromosome|eukaryotic translation initiation factor 4C	CDS	GACGGCTAGAAGCAATGTGTT	113.654	119.513	64.1394	111.558	115.511	67.143
NM_001412.2-372s1c1	TRCN0000062620	NM_001412	EIF1AX	1964	Putative eukaryotic translation initiation factor 1A|Xlinked eukaryotic translation initiation factor 1A|eukaryotic translation initiation factor 1A, X chromosome|eukaryotic translation initiation factor 4C	CDS	GTTATGTCACATCAGAGGAAA	110.046	84.8276	127.553	112.388	72.0079	135.045
NM_001412.2-444s1c1	TRCN0000062618	NM_001412	EIF1AX	1964	Putative eukaryotic translation initiation factor 1A|Xlinked eukaryotic translation initiation factor 1A|eukaryotic translation initiation factor 1A, X chromosome|eukaryotic translation initiation factor 4C	CDS	CCGAGACTACCAGGATAACAA	124.34	65.2479	56.1795	150.003	76.5938	56.7321
NM_001412.3-575s21c1	TRCN0000299509	NM_001412	EIF1AX	1964	Putative eukaryotic translation initiation factor 1A|Xlinked eukaryotic translation initiation factor 1A|eukaryotic translation initiation factor 1A, X chromosome|eukaryotic translation initiation factor 4C	CDS	CCTGGAGATGATGATGAAATT	66.658	44.9764	52.5629	101.179	62.7939	64.1354
NM_024526.2-451s1c1	TRCN0000063130	NM_024526	EPS8L3	79574	EPS8related protein 3|epidermal growth factor receptor pathway substrate 8like protein 3|epidermal growth factor receptor pathway substrate 8related protein 3	CDS	GCTCAACACATGTTCCTACAA	134.979	145.78	112.511	139.243	137.785	86.7886
NM_024526.2-1543s1c1	TRCN0000063128	NM_024526	EPS8L3	79574	EPS8related protein 3|epidermal growth factor receptor pathway substrate 8like protein 3|epidermal growth factor receptor pathway substrate 8related protein 3	CDS	CGGCTACATTCCAAGCAACAT	202.413	132.5	151.632	263.359	192.457	157.59
NM_024526.2-1081s1c1	TRCN0000063129	NM_024526	EPS8L3	79574	EPS8related protein 3|epidermal growth factor receptor pathway substrate 8like protein 3|epidermal growth factor receptor pathway substrate 8related protein 3	CDS	GCTCGTACACATCCTCTTCAA	98.0553	83.5541	84.2134	89.9533	99.5663	88.875
NM_024526.2-1009s1c1	TRCN0000063131	NM_024526	EPS8L3	79574	EPS8related protein 3|epidermal growth factor receptor pathway substrate 8like protein 3|epidermal growth factor receptor pathway substrate 8related protein 3	CDS	CCAGAAGATCAAGCACAGCTT	206.006	90.2289	90.7079	300.936	97.9618	86.2322
NM_024526.2-1175s1c1	TRCN0000063132	NM_024526	EPS8L3	79574	EPS8related protein 3|epidermal growth factor receptor pathway substrate 8like protein 3|epidermal growth factor receptor pathway substrate 8related protein 3	CDS	CCTAAAGCTATCAACCTGCTA	48.6893	91.2549	68.2284	37.1023	62.1066	68.4276
NM_001984.1-508s21c1	TRCN0000327760	NM_001984	ESD	2098	Esterase D; Sformylglutathione hydrolase|OTTHUMP00000040929|esterase 10	CDS	GCCACTGAAGATCCTTGGAAA	81.0466	87.4933	163.401	80.332	125.379	156.838
NM_001984.1-1038s21c1	TRCN0000312620	NM_001984	ESD	2098	Esterase D; Sformylglutathione hydrolase|OTTHUMP00000040929|esterase 10	3UTR	CTCCAAATAAGAGAATCTCTT	86.1686	114.328	155.201	81.1268	117.361	168.633
NM_001984.1-435s21c1	TRCN0000312621	NM_001984	ESD	2098	Esterase D; Sformylglutathione hydrolase|OTTHUMP00000040929|esterase 10	CDS	CCCTCGTGGCTGCAATATTAA	108.091	110.501	181.238	97.3042	103.023	211.994
NM_001984.1-700s1c1	TRCN0000048715	NM_001984	ESD	2098	Esterase D; Sformylglutathione hydrolase|OTTHUMP00000040929|esterase 10	CDS	GCTCCAATTTGCAACCCTGTA	110.02	101.567	55.2323	107.871	83.0813	46.18
NM_001984.1-940s21c1	TRCN0000327685	NM_001984	ESD	2098	Esterase D; Sformylglutathione hydrolase|OTTHUMP00000040929|esterase 10	CDS	CGATTGCAAGAGGGTTATGAT	102.313	99.7347	95.4254	113.061	90.8315	71.1562
NM_021727.3-1068s1c1	TRCN0000064716	NM_021727	FADS3	3995	delta9 fatty acid desaturase|delta9desaturase|linoleoylCoA desaturase (delta9desaturase)like 3	CDS	CCGCTTCTTCTTATCCTACCT	68.4855	81.7692	95.946	52.4235	92.3311	94.8563
NM_021727.3-903s1c1	TRCN0000064717	NM_021727	FADS3	3995	delta9 fatty acid desaturase|delta9desaturase|linoleoylCoA desaturase (delta9desaturase)like 3	CDS	TGGCAAGAAGAAACGCAGATA	68.4212	89.0532	97.9755	53.8759	77.744	92.3525
NM_021727.3-1443s1c1	TRCN0000064713	NM_021727	FADS3	3995	delta9 fatty acid desaturase|delta9desaturase|linoleoylCoA desaturase (delta9desaturase)like 3	CDS	CCTGAAGAAGTCTGGTGACAT	104.775	78.4078	65.6577	96.5597	92.477	63.6983
NM_021727.3-517s1c1	TRCN0000064715	NM_021727	FADS3	3995	delta9 fatty acid desaturase|delta9desaturase|linoleoylCoA desaturase (delta9desaturase)like 3	CDS	GCCGAGGACATGAAGCTGTTT	86.5778	111.616	79.8257	78.193	138.135	80.3901
NM_021727.3-380s1c1	TRCN0000064714	NM_021727	FADS3	3995	delta9 fatty acid desaturase|delta9desaturase|linoleoylCoA desaturase (delta9desaturase)like 3	CDS	CCTTCCATCAAGATCTCAATT	100.892	108.372	89.6448	88.3134	102.513	97.9164
NM_018062.1-710s1c1	TRCN0000083301	NM_018062	FANCL	55120	PHD finger protein 9	CDS	GCAGAATTGCATTAGGTAATA	87.2907	116.3	134.789	69.5372	107.293	137.985
NM_018062.1-371s1c1	TRCN0000083299	NM_018062	FANCL	55120	PHD finger protein 9	CDS	GCCTTATTGAAGAGATAGGAA	140.66	119.684	144.632	145.744	106.995	140.496
NM_018062.3-544s21c1	TRCN0000323352	NM_018062	FANCL	55120	PHD finger protein 9	CDS	TGCAGAATCACCAGATTATTT	84.2747	146.777	131.802	81.1118	166.181	147.141
NM_018062.1-1027s1c1	TRCN0000083300	NM_018062	FANCL	55120	PHD finger protein 9	CDS	CCTTTCCATCAAATATGCTTA	63.2681	76.7915	94.8274	46.6871	70.2089	103.429
NM_018062.3-865s21c1	TRCN0000301012	NM_018062	FANCL	55120	PHD finger protein 9	CDS	GCTGAGCAGGAACATACATTT	144.073	97.1021	114.491	126.981	82.0611	98.1125
NM_001001715.2-402s21c1	TRCN0000303352	NM_001001715	FARP1	10160	FERM, RhoGEF, and pleckstrin domain protein 1|OTTHUMP00000040734|chondrocytederived ezrinlike protein	CDS	CAGTACCTTGGAACGTGGACA	66.2467	83.1125	110.961	45.5043	96.6449	92.9237
NM_001001715.2-662s21c1	TRCN0000303289	NM_001001715	FARP1	10160	FERM, RhoGEF, and pleckstrin domain protein 1|OTTHUMP00000040734|chondrocytederived ezrinlike protein	CDS	CAAACTGGGCTGGAAGTAGAA	93.0808	68.3172	167.777	76.7476	79.77	143.778
NM_001001715.2-561s21c1	TRCN0000310669	NM_001001715	FARP1	10160	FERM, RhoGEF, and pleckstrin domain protein 1|OTTHUMP00000040734|chondrocytederived ezrinlike protein	CDS	GGTACTGAGATGCTCCATGAA	161.075	131.859	228.626	184.898	148.769	372.7
NM_001001715.2-584s21c1	TRCN0000291823	NM_001001715	FARP1	10160	FERM, RhoGEF, and pleckstrin domain protein 1|OTTHUMP00000040734|chondrocytederived ezrinlike protein	CDS	CCAAGCACCATTCACATCTAA	78.5973	99.0546	79.0527	68.6423	84.9301	70.9119
NM_001001715.2-774s21c1	TRCN0000303354	NM_001001715	FARP1	10160	FERM, RhoGEF, and pleckstrin domain protein 1|OTTHUMP00000040734|chondrocytederived ezrinlike protein	3UTR	TGGCAATGGCCAGAGTTAAAT	111.02	120.346	54.636	110.112	126.071	42.9798
NM_002002.4-603s21c1	TRCN0000372179	NM_002002	FCER2	2208	Ctype lectin domain family 4, member J|CD23 antigen|Fc fragment of IgE, low affinity II, receptor for (CD23A)	CDS	GAGGAACGAAGCTTCAGATTT	100.751	141.322	72.6065	81.5903	122.612	57.5015
NM_002002.4-354s21c1	TRCN0000372178	NM_002002	FCER2	2208	Ctype lectin domain family 4, member J|CD23 antigen|Fc fragment of IgE, low affinity II, receptor for (CD23A)	CDS	GGACACCACACAGAGTCTAAA	95.5319	69.7789	87.3827	83.5344	59.7731	77.4378
NM_002002.3-359s1c1	TRCN0000029616	NM_002002	FCER2	2208	Ctype lectin domain family 4, member J|CD23 antigen|Fc fragment of IgE, low affinity II, receptor for (CD23A)	CDS	GCCCGGAACGTCTCTCAAGTT	97.3316	117.235	107.725	91.3006	105.244	83.7879
NM_002002.3-844s1c1	TRCN0000029617	NM_002002	FCER2	2208	Ctype lectin domain family 4, member J|CD23 antigen|Fc fragment of IgE, low affinity II, receptor for (CD23A)	CDS	CCTTCGGAACTTGGACCTGAA	94.0425	128.158	96.2982	89.6456	139.868	88.5135
NM_002002.3-676s1c1	TRCN0000029615	NM_002002	FCER2	2208	Ctype lectin domain family 4, member J|CD23 antigen|Fc fragment of IgE, low affinity II, receptor for (CD23A)	CDS	GTGGATCAATTTCCAACGGAA	111.35	99.2987	91.501	120.392	91.9379	90.8764
NM_000566.2-868s1c1	TRCN0000029572	NM_000566	FCGR1A	2209	Fc fragment of IgG, high affinity Ia, receptor for (CD64)|Fc gamma receptor|Fcgamma RI|Fcgamma receptor I A1|IgG Fc receptor I	CDS	CCAACTCCTGTCTGGTTTCAT	173.157	128.057	87.9285	168.846	107.688	61.2042
NM_000566.2-536s1c1	TRCN0000029570	NM_000566	FCGR1A	2209	Fc fragment of IgG, high affinity Ia, receptor for (CD64)|Fc gamma receptor|Fcgamma RI|Fcgamma receptor I A1|IgG Fc receptor I	CDS	GCTACACATCAGCAGGAATAT	164.439	73.809	144.486	226.924	84.5296	202.906
NM_000566.2-681s1c1	TRCN0000029569	NM_000566	FCGR1A	2209	Fc fragment of IgG, high affinity Ia, receptor for (CD64)|Fc gamma receptor|Fcgamma RI|Fcgamma receptor I A1|IgG Fc receptor I	CDS	GCAGCTTTACTTCTCCTTCTA	79.8928	114.196	106.998	71.1446	126.172	110.503
NM_000566.2-417s1c1	TRCN0000029573	NM_000566	FCGR1A	2209	Fc fragment of IgG, high affinity Ia, receptor for (CD64)|Fc gamma receptor|Fcgamma RI|Fcgamma receptor I A1|IgG Fc receptor I	CDS	GCTTTACTATCGAAATGGCAA	78.3121	110.039	67.408	69.3523	119.576	52.0414
NM_000566.2-114s1c1	TRCN0000029571	NM_000566	FCGR1A	2209	Fc fragment of IgG, high affinity Ia, receptor for (CD64)|Fc gamma receptor|Fcgamma RI|Fcgamma receptor I A1|IgG Fc receptor I	CDS	CCAAGAGGAAACCGTAACCTT	91.9755	102.548	78.9799	81.2683	91.2344	77.8523
NM_001494.2-269s1c1	TRCN0000047375	NM_001494	GDI2	2665	rab GDPdissociation inhibitor, beta	CDS	CGGAGGAGAAAGTGCATCTAT	106.667	114.974	81.2179	105.477	114.028	69.8502
NM_001494.2-384s1c1	TRCN0000047377	NM_001494	GDI2	2665	rab GDPdissociation inhibitor, beta	CDS	CCCAAGTTCCTTATGGCTAAT	126.398	81.6515	84.9422	130.055	80.4966	79.9747
NM_001494.2-1103s1c1	TRCN0000047374	NM_001494	GDI2	2665	rab GDPdissociation inhibitor, beta	CDS	CCAGATCATTATTCCACAGAA	82.6755	100.284	62.1582	82.9914	119.473	73.0901
NM_001494.2-819s1c1	TRCN0000047373	NM_001494	GDI2	2665	rab GDPdissociation inhibitor, beta	CDS	CCATACCTTTATCCACTCTAT	88.1389	90.282	84.2849	89.1239	86.3877	85.6444
NM_001494.2-1458s1c1	TRCN0000047376	NM_001494	GDI2	2665	rab GDPdissociation inhibitor, beta	CDS	CGCAAGAAGAATGACATCTAT	94.5221	108.937	53.6938	93.8779	74.427	39.2069
NM_175571.1-2024s1c1	TRCN0000048336	NM_175571	GIMAP8	155038	human immune associated nucleotide 6|immune associated nucleotide	CDS	CAAAGGTCAATGATCTGAGAA	121.718	64.0516	143.197	114.557	79.247	143.826
NM_175571.1-1075s1c1	TRCN0000048335	NM_175571	GIMAP8	155038	human immune associated nucleotide 6|immune associated nucleotide	CDS	GCTCCGGACATCTCATCTTTA	139.076	104.888	125.73	143.937	101.324	104.948
NM_175571.1-625s1c1	TRCN0000048337	NM_175571	GIMAP8	155038	human immune associated nucleotide 6|immune associated nucleotide	CDS	CCTCTCAAGCAGTTGGTTCAA	122.283	113.369	87.5313	125.682	88.0539	97.9287
NM_175571.1-763s1c1	TRCN0000048333	NM_175571	GIMAP8	155038	human immune associated nucleotide 6|immune associated nucleotide	CDS	CCCTATCATGTGAACTTCAAA	90.4307	75.8033	96.8918	66.0675	67.2566	64.4505
NM_175571.1-1817s1c1	TRCN0000048334	NM_175571	GIMAP8	155038	human immune associated nucleotide 6|immune associated nucleotide	CDS	CCATCTTTGGAGCAGACTTTA	163.665	113.786	138.795	153.777	179.901	142.206
NM_057169.3-403s21c1	TRCN0000364546	NM_057169	GIT2	9815	ARF GTPaseactivating protein GIT2|G proteincoupled receptor kinaseinteractor 2|GRKinteracting protein 2|coolassociated, tyrosine phosphorylated protein 2	CDS	TTGCTGGACCCTGCGTCTATT	114.658	92.7678	79.0915	99.2391	84.5296	60.9461
NM_057169.3-2771s21c1	TRCN0000364617	NM_057169	GIT2	9815	ARF GTPaseactivating protein GIT2|G proteincoupled receptor kinaseinteractor 2|GRKinteracting protein 2|coolassociated, tyrosine phosphorylated protein 2	3UTR	GCCTATGGCTGAAACTATAAA	83.9828	138.079	107.444	60.9724	150.454	114.375
NM_057169.3-1129s21c1	TRCN0000364544	NM_057169	GIT2	9815	ARF GTPaseactivating protein GIT2|G proteincoupled receptor kinaseinteractor 2|GRKinteracting protein 2|coolassociated, tyrosine phosphorylated protein 2	CDS	GAGTACTCATCAACACGAAAT	102.559	109.479	122.886	80.8323	107.072	103.534
NM_057169.3-371s21c1	TRCN0000364545	NM_057169	GIT2	9815	ARF GTPaseactivating protein GIT2|G proteincoupled receptor kinaseinteractor 2|GRKinteracting protein 2|coolassociated, tyrosine phosphorylated protein 2	CDS	ATAACGGTGCTAACTCTATAT	89.9142	107.148	69.2126	73.8087	98.664	55.7839
NM_057169.3-1322s21c1	TRCN0000364618	NM_057169	GIT2	9815	ARF GTPaseactivating protein GIT2|G proteincoupled receptor kinaseinteractor 2|GRKinteracting protein 2|coolassociated, tyrosine phosphorylated protein 2	CDS	ACAACGATCAGCCCGACTATG	83.2332	95.3824	74.8683	80.687	107.434	72.1739
NM_002064.1-172s1c1	TRCN0000036227	NM_002064	GLRX	2745		CDS	CACACTAACGAGATTCAAGAT	190.396	146.168	91.9017	222.797	143.911	78.942
NM_002064.2-307s21c1	TRCN0000286960	NM_002064	GLRX	2745		CDS	CCTCAGTCAATTGCCCATCAA	78.1713	89.0307	79.8643	62.9645	76.5938	68.8782
NM_002064.2-456s21c1	TRCN0000286961	NM_002064	GLRX	2745		CDS	GATGCAGTGATCTAGTCTCTT	154.474	109.445	117.448	170.716	97.8828	104.275
NM_002064.2-517s21c1	TRCN0000294242	NM_002064	GLRX	2745		CDS	TGGAGCTCTGCAGTAACCACA	134.503	137.679	187.864	154.367	142.943	196.816
NM_002064.2-393s21c1	TRCN0000306922	NM_002064	GLRX	2745		CDS	TGCAACAGCTCACGGGAGCAA	124.407	98.4898	61.6397	126.135	102.889	42.9666
NM_031302.2-639s1c1	TRCN0000034921	NM_031302	GLT8D2	83468	gycosyltransferase	CDS	GCCAACATCTTGTTCTATGTA	118.559	150.622	187.429	101.479	133.525	207.387
NM_031302.2-669s1c1	TRCN0000034923	NM_031302	GLT8D2	83468	gycosyltransferase	CDS	CGGAATACTCTGACTCGAATA	57.5787	70.9903	101.629	40.71	82.762	90.6833
NM_031302.2-1481s1c1	TRCN0000034919	NM_031302	GLT8D2	83468	gycosyltransferase	3UTR	CCCTGTATAGAAATGTGGAAT	101.142	123.891	118.058	100.449	79.2027	108.766
NM_031302.2-1425s1c1	TRCN0000034922	NM_031302	GLT8D2	83468	gycosyltransferase	CDS	GCAGGGATATTTAAACTCAAT	92.8631	126.141	87.9052	78.9427	107.531	74.5479
NM_031302.2-807s1c1	TRCN0000034920	NM_031302	GLT8D2	83468	gycosyltransferase	CDS	CCTCTGAACTTTGTTCGATTT	177.787	115.667	145.389	221.519	108.669	164.684
NM_021955.3-292s21c1	TRCN0000358656	NM_021955	GNGT1	2792		CDS	TGGCGAGGATCCACTGGTAAA	152.134	133.735	199.448	159.249	134.26	234.508
NM_021955.3-449s21c1	TRCN0000358657	NM_021955	GNGT1	2792		3UTR	ATGCATACTATTACTACTAAG	169.894	148.919	126.737	173.835	168.954	106.069
NM_021955.3-229s21c1	TRCN0000358595	NM_021955	GNGT1	2792		CDS	ACTGGAAAGAATGCTAGTTTC	75.4489	120.37	137.859	74.0421	116.089	142.081
NM_021955.2-200s1c1	TRCN0000036845	NM_021955	GNGT1	2792		CDS	GAAGTTGACCAGCTCAAGAAA	79.8526	96.4122	82.303	70.185	86.8513	104.827
NM_021955.2-352s1c1	TRCN0000036847	NM_021955	GNGT1	2792		CDS	AGGAGGCTGTGTGATTTCATA	93.5746	83.4386	76.5323	90.312	80.211	74.8459
NM_005471.3-432s1c1	TRCN0000049360	NM_005471	GNPDA1	10007	glucosamine6phosphate isomerase|oscillin	CDS	CGAGCTATTTGTTGGAGGCAT	201.843	152.966	200.998	227.843	166.405	182.288
NM_005471.4-129s21c1	TRCN0000298651	NM_005471	GNPDA1	10007	glucosamine6phosphate isomerase|oscillin	CDS	GGAACCGCATCATCCAGTTTA	210.667	59.8721	168.776	338.803	74.7933	171.508
NM_005471.3-777s1c1	TRCN0000049362	NM_005471	GNPDA1	10007	glucosamine6phosphate isomerase|oscillin	CDS	GCTGAAAGTGAAGACTGTCAA	139.016	115.728	135.671	143.67	118.587	156.592
NM_005471.3-309s1c1	TRCN0000049361	NM_005471	GNPDA1	10007	glucosamine6phosphate isomerase|oscillin	CDS	GAACAACTTCTTCAAGCACAT	120.889	115.179	151.171	134.937	118.326	163.681
NM_005471.4-1084s21c1	TRCN0000293995	NM_005471	GNPDA1	10007	glucosamine6phosphate isomerase|oscillin	3UTR	GGAGCCTAGTCACGGAGTTTA	117.24	105.829	68.986	101.14	89.7389	48.7886
NM_000183.2-1932s21c1	TRCN0000245337	NM_000183	HADHB	3032	2enoylCoenzyme A (CoA) hydratase, beta subunit|3ketoacylCoenzyme A (CoA) thiolase of mitochondrial trifunctional protein, beta subunit|acetylCoA acyltransferase|betaketothiolase|hydroxyacylCoenzyme A (CoA) dehydrogenase, beta subunit|mitochondrial trifunc	3UTR	GTTGTCACTAAAGACTAAATG	67.2787	121.776	86.2642	58.9327	115.806	78.248
NM_000183.1-758s1c1	TRCN0000028067	NM_000183	HADHB	3032	2enoylCoenzyme A (CoA) hydratase, beta subunit|3ketoacylCoenzyme A (CoA) thiolase of mitochondrial trifunctional protein, beta subunit|acetylCoA acyltransferase|betaketothiolase|hydroxyacylCoenzyme A (CoA) dehydrogenase, beta subunit|mitochondrial trifunc	CDS	CGGCTGGAACAGGATGAATAT	159.276	127.491	147.231	170.144	135.917	152.512
NM_000183.1-629s1c1	TRCN0000028110	NM_000183	HADHB	3032	2enoylCoenzyme A (CoA) hydratase, beta subunit|3ketoacylCoenzyme A (CoA) thiolase of mitochondrial trifunctional protein, beta subunit|acetylCoA acyltransferase|betaketothiolase|hydroxyacylCoenzyme A (CoA) dehydrogenase, beta subunit|mitochondrial trifunc	CDS	CGACTGTCTTTAATCTCTAAA	90.5365	81.8801	72.7908	77.4309	70.1988	61.0122
NM_000183.2-530s21c1	TRCN0000245334	NM_000183	HADHB	3032	2enoylCoenzyme A (CoA) hydratase, beta subunit|3ketoacylCoenzyme A (CoA) thiolase of mitochondrial trifunctional protein, beta subunit|acetylCoA acyltransferase|betaketothiolase|hydroxyacylCoenzyme A (CoA) dehydrogenase, beta subunit|mitochondrial trifunc	CDS	CCCTAAGGAAGTAGTTGATTA	65.3618	85.8051	109.24	51.2104	72.9756	110.522
NM_000183.2-1242s21c1	TRCN0000245336	NM_000183	HADHB	3032	2enoylCoenzyme A (CoA) hydratase, beta subunit|3ketoacylCoenzyme A (CoA) thiolase of mitochondrial trifunctional protein, beta subunit|acetylCoA acyltransferase|betaketothiolase|hydroxyacylCoenzyme A (CoA) dehydrogenase, beta subunit|mitochondrial trifunc	CDS	TATAAGCCGAAGGCATATTTG	61.8141	96.4972	88.9766	45.2227	88.206	75.7031
NM_020897.1-552s1c1	TRCN0000044018	NM_020897	HCN3	57657	potassium/sodium hyperpolarizationactivated cyclic nucleotidegated channel 3	CDS	CCTGTGGATTACATCTTCCTA	151.906	98.1006	89.6641	147.771	82.4119	86.2322
NM_020897.1-395s1c1	TRCN0000044019	NM_020897	HCN3	57657	potassium/sodium hyperpolarizationactivated cyclic nucleotidegated channel 3	CDS	CAACGTATTGTCTGATACTTT	144.198	155.977	161.973	135.027	139.331	209.473
NM_020897.1-753s1c1	TRCN0000044020	NM_020897	HCN3	57657	potassium/sodium hyperpolarizationactivated cyclic nucleotidegated channel 3	CDS	GTTCGCATCTTCAACCTCATT	83.2101	93.1146	101.764	70.2747	95.4819	104.732
NM_020897.1-1557s1c1	TRCN0000044022	NM_020897	HCN3	57657	potassium/sodium hyperpolarizationactivated cyclic nucleotidegated channel 3	CDS	CTCAGCGTGGACCATTTCAAT	78.7735	110.339	185.265	70.3684	118.938	214.62
NM_020897.1-2309s1c1	TRCN0000044021	NM_020897	HCN3	57657	potassium/sodium hyperpolarizationactivated cyclic nucleotidegated channel 3	CDS	TCTCCAGCTTTCTGCCAACAT	131.065	105.54	89.7994	211.351	74.9141	60.7772
NM_003725.2-869s21c1	TRCN0000292060	NM_003725	HSD17B6	8630	3(alpha>beta)hydroxysteroid epimerase|3(alpha>beta)hydroxysteroid epimerasel|3hydroxysteroid epimerase|NAD+ dependent 3 alphahydroxysteroid dehydrogenase 3hydroxysteroid epimerase|hydroxysteroid (17beta) dehydrogenase 6|oxidative 3alphahydroxysteroiddehyd	CDS	GCTGTTGAATTGTAGCACAAA	101.8	63.1575	110.02	97.2393	51.6866	108.787
NM_003725.2-1317s21c1	TRCN0000292154	NM_003725	HSD17B6	8630	3(alpha>beta)hydroxysteroid epimerase|3(alpha>beta)hydroxysteroid epimerasel|3hydroxysteroid epimerase|NAD+ dependent 3 alphahydroxysteroid dehydrogenase 3hydroxysteroid epimerase|hydroxysteroid (17beta) dehydrogenase 6|oxidative 3alphahydroxysteroiddehyd	3UTR	GCCTTATTAAACAGAGTAGAT	112.127	98.3695	155.546	100.874	80.3804	132.5
NM_003725.2-188s21c1	TRCN0000292061	NM_003725	HSD17B6	8630	3(alpha>beta)hydroxysteroid epimerase|3(alpha>beta)hydroxysteroid epimerasel|3hydroxysteroid epimerase|NAD+ dependent 3 alphahydroxysteroid dehydrogenase 3hydroxysteroid epimerase|hydroxysteroid (17beta) dehydrogenase 6|oxidative 3alphahydroxysteroiddehyd	CDS	CCTCCAAGACAAGTATGTCTT	82.717	90.3391	86.7251	73.9527	76.9725	83.9161
NM_003725.2-774s1c1	TRCN0000049472	NM_003725	HSD17B6	8630	3(alpha>beta)hydroxysteroid epimerase|3(alpha>beta)hydroxysteroid epimerasel|3hydroxysteroid epimerase|NAD+ dependent 3 alphahydroxysteroid dehydrogenase 3hydroxysteroid epimerase|hydroxysteroid (17beta) dehydrogenase 6|oxidative 3alphahydroxysteroiddehyd	CDS	CGAATGAAGCAAAGTTGGAAA	122.46	75.5565	132.836	114.963	61.0268	112.835
NM_003725.2-447s21c1	TRCN0000292063	NM_003725	HSD17B6	8630	3(alpha>beta)hydroxysteroid epimerase|3(alpha>beta)hydroxysteroid epimerasel|3hydroxysteroid epimerase|NAD+ dependent 3 alphahydroxysteroid dehydrogenase 3hydroxysteroid epimerase|hydroxysteroid (17beta) dehydrogenase 6|oxidative 3alphahydroxysteroiddehyd	CDS	GCAGGCATTCTTACACCAATT	97.1451	136.912	139.378	92.3956	158.72	207.227
NM_005526.1-1312s1c1	TRCN0000007484	NM_005526	HSF1	3297		CDS	CAGTGACCACTTGGATGCTAT	122.291	129.331	199.279	118.767	133.756	200.748
NM_005526.1-331s1c1	TRCN0000007483	NM_005526	HSF1	3297		CDS	GCCCAAGTACTTCAAGCACAA	137.142	56.3992	89.1477	172.063	46.4674	90.2857
NM_005526.1-700s1c1	TRCN0000007482	NM_005526	HSF1	3297		CDS	CCAGCAACAGAAAGTCGTCAA	46.2644	83.8412	89.8039	36.5382	82.0983	105.201
NM_005526.1-815s1c1	TRCN0000007481	NM_005526	HSF1	3297		CDS	GCACATTCCATGCCCAAGTAT	104.313	86.7205	45.8827	81.4308	60.8167	31.6581
NM_005526.2-2009s21c1	TRCN0000318712	NM_005526	HSF1	3297		3UTR	GCAGGTTGTTCATAGTCAGAA	146.128	79.322	67.832	138.277	51.5363	49.97
NM_014278.2-2958s1c1	TRCN0000152797	NM_014278	HSPA4L	22824	heat shock 70 kDa protein 4like protein|heat shock protein (hsp110 family)	3UTR	GCAGTGTTAGCCGAATTAGAT	134.891	164.436	136.537	128.326	162.233	92.6307
NM_014278.2-1938s1c1	TRCN0000152051	NM_014278	HSPA4L	22824	heat shock 70 kDa protein 4like protein|heat shock protein (hsp110 family)	CDS	CAGACAAACAAGACCGATTAA	76.5551	102.125	119.179	62.9655	96.0654	154.529
NM_014278.2-923s1c1	TRCN0000151064	NM_014278	HSPA4L	22824	heat shock 70 kDa protein 4like protein|heat shock protein (hsp110 family)	CDS	GCTACTACCTTTGATCCATAT	107.564	122.844	114.637	118.862	120.193	137.977
NM_014278.2-2926s1c1	TRCN0000150919	NM_014278	HSPA4L	22824	heat shock 70 kDa protein 4like protein|heat shock protein (hsp110 family)	3UTR	GCACTTCTGTTCATTTCCATT	51.0443	96.5135	69.9873	35.4156	96.4739	58.8298
NM_014278.2-2111s1c1	TRCN0000152659	NM_014278	HSPA4L	22824	heat shock 70 kDa protein 4like protein|heat shock protein (hsp110 family)	CDS	GCTAAGAATGCCGTTGAAGAA	54.2191	102.868	92.9887	35.1813	72.1133	79.9728
NM_006860.2-470s1c1	TRCN0000047383	NM_006860	IFT27	11020		CDS	CCCTGACAACAGGAATGGATT	105.28	81.6595	92.3005	82.3339	60.7912	74.2388
NM_006860.2-619s1c1	TRCN0000047384	NM_006860	IFT27	11020		CDS	CTCGTCTATGATGTGACCAAT	112.263	130.775	66.3476	109.218	125.229	49.3312
NM_006860.2-527s1c1	TRCN0000047387	NM_006860	IFT27	11020		CDS	ACAGTGTGGAACTCTTCATTT	81.2452	68.2895	51.7618	66.5913	55.9348	52.5576
NM_006860.2-815s1c1	TRCN0000047385	NM_006860	IFT27	11020		CDS	CATCCGTGAAAGAGATGGAAA	71.8675	90.596	97.026	64.2178	74.998	106.89
NM_006860.2-605s1c1	TRCN0000047386	NM_006860	IFT27	11020		CDS	CCAATGTCTTATGTCTCGTCT	60.6158	78.5747	53.2129	43.6313	74.5269	42.1041
NM_000878.2-227s1c1	TRCN0000058753	NM_000878	IL2RB	3560	CD122 antigen|OTTHUMP00000028799|high affinity IL2 receptor beta subunit|interleukin 2 receptor beta	CDS	CCAGTTCACATGCTTCTACAA	129.731	75.2035	130.112	122.829	88.4704	122.227
NM_000878.2-729s1c1	TRCN0000058757	NM_000878	IL2RB	3560	CD122 antigen|OTTHUMP00000028799|high affinity IL2 receptor beta subunit|interleukin 2 receptor beta	CDS	CCAGACACCCAGTATGAGTTT	91.2135	81.8792	74.6655	104.384	76.2122	72.6851
NM_000878.2-1734s1c1	TRCN0000058756	NM_000878	IL2RB	3560	CD122 antigen|OTTHUMP00000028799|high affinity IL2 receptor beta subunit|interleukin 2 receptor beta	CDS	GCCTACTTGTCCCTCCAAGAA	92.198	88.5715	99.9988	93.45	93.0226	138.561
NM_000878.2-899s1c1	TRCN0000058754	NM_000878	IL2RB	3560	CD122 antigen|OTTHUMP00000028799|high affinity IL2 receptor beta subunit|interleukin 2 receptor beta	CDS	CTTCATCATCTTAGTGTACTT	77.6803	114.224	127.244	63.5954	82.4008	144.366
NM_000878.2-1214s1c1	TRCN0000058755	NM_000878	IL2RB	3560	CD122 antigen|OTTHUMP00000028799|high affinity IL2 receptor beta subunit|interleukin 2 receptor beta	CDS	CCAGGGTTACTTCTTCTTCCA	90.116	97.3686	95.8164	83.2766	103.972	100.224
NM_000589.2-414s21c1	TRCN0000372661	NM_000589	IL4	3565	B cell growth factor 1|B_cell stimulatory factor 1|lymphocyte stimulatory factor 1	CDS	TAGCATGTGCCGGCAACTTTG	103.267	122.608	114.137	99.5777	114.497	116.385
NM_000589.2-436s1c1	TRCN0000058184	NM_000589	IL4	3565	B cell growth factor 1|B_cell stimulatory factor 1|lymphocyte stimulatory factor 1	CDS	CCACGGACACAAGTGCGATAT	139.246	145.135	95.7412	150.1	164.339	94.5702
NM_000589.2-675s21c1	TRCN0000372659	NM_000589	IL4	3565	B cell growth factor 1|B_cell stimulatory factor 1|lymphocyte stimulatory factor 1	CDS	AGCTGATCCGATTCCTGAAAC	90.2424	134.899	118.768	86.3835	157.155	143.797
NM_000589.2-458s21c1	TRCN0000372660	NM_000589	IL4	3565	B cell growth factor 1|B_cell stimulatory factor 1|lymphocyte stimulatory factor 1	CDS	ACCTTACAGGAGATCATCAAA	79.2176	109.323	87.5341	65.5065	111.066	89.4035
NM_000589.2-552s1c1	TRCN0000058187	NM_000589	IL4	3565	B cell growth factor 1|B_cell stimulatory factor 1|lymphocyte stimulatory factor 1	CDS	AGAACACAACTGAGAAGGAAA	105.012	75.0503	80.2102	111.603	60.0532	67.5886
NM_019892.3-1978s1c1	TRCN0000082674	NM_019892	INPP5E	56623	inositol polyphosphate5phosphatase E|phosphatidylinositol (4,5) bisphosphate 5phosphatase|phosphatidylinositol polyphosphate 5phosphatase type IV	CDS	CCCATCATACAAGTTTGACAT	171.002	150.965	84.2609	169.138	160.067	60.8965
NM_019892.3-2306s21c1	TRCN0000360140	NM_019892	INPP5E	56623	inositol polyphosphate5phosphatase E|phosphatidylinositol (4,5) bisphosphate 5phosphatase|phosphatidylinositol polyphosphate 5phosphatase type IV	CDS	TGCTCCGTTTCTTGAAGTTTG	79.1997	82.3463	100.89	68.0388	72.7231	109.596
NM_019892.3-1576s1c1	TRCN0000082675	NM_019892	INPP5E	56623	inositol polyphosphate5phosphatase E|phosphatidylinositol (4,5) bisphosphate 5phosphatase|phosphatidylinositol polyphosphate 5phosphatase type IV	CDS	CGTGTCTCAGATCAAGACCAA	91.9848	112.28	113.796	84.3689	112.819	115.727
NM_019892.3-2272s1c1	TRCN0000082676	NM_019892	INPP5E	56623	inositol polyphosphate5phosphatase E|phosphatidylinositol (4,5) bisphosphate 5phosphatase|phosphatidylinositol polyphosphate 5phosphatase type IV	CDS	GCAAGCACTACAGAGTCAGAA	85.7839	104.565	128.049	84.6734	98.6401	121.974
NM_019892.3-2201s1c1	TRCN0000082677	NM_019892	INPP5E	56623	inositol polyphosphate5phosphatase E|phosphatidylinositol (4,5) bisphosphate 5phosphatase|phosphatidylinositol polyphosphate 5phosphatase type IV	CDS	GCTGGCAAATTTGATAGAGAA	79.4735	130.16	143.349	64.7451	149.675	156.792
NM_030790.3-730s21c1	TRCN0000343700	NM_030790	ITFG1	81533	2310047C21Rik|T cell immunomodulatory protein|Tcell immunomodulatory protein	CDS	CGACATTGAATGCCACCACTA	118.471	102.477	134.989	124.588	86.8915	141.214
NM_030790.3-1925s21c1	TRCN0000343702	NM_030790	ITFG1	81533	2310047C21Rik|T cell immunomodulatory protein|Tcell immunomodulatory protein	3UTR	GAATGGCTGTTCACTTGATTA	111.343	97.0688	97.3998	113.398	94.3578	103.181
NM_030790.3-1422s21c1	TRCN0000343701	NM_030790	ITFG1	81533	2310047C21Rik|T cell immunomodulatory protein|Tcell immunomodulatory protein	CDS	CCTCGTAAGATAACACCCTTT	105.505	86.3754	98.563	111.311	73.9365	109.353
NM_030790.3-1681s21c1	TRCN0000343775	NM_030790	ITFG1	81533	2310047C21Rik|T cell immunomodulatory protein|Tcell immunomodulatory protein	CDS	CCCAGCTAATTGTCATTCCAT	85.8021	88.938	100.523	73.9408	87.3758	92.4174
NM_030790.2-261s1c1	TRCN0000156516	NM_030790	ITFG1	81533	2310047C21Rik|T cell immunomodulatory protein|Tcell immunomodulatory protein	CDS	GCTGCGGGAAAGAAATGACTT	56.8709	139.146	77.4745	41.2476	137.985	50.5098
NM_000885.2-2209s1c1	TRCN0000029656	NM_000885	ITGA4	3676	269C wild type|antigen CD49D, alpha4 subunit of VLA4 receptor|integrin alpha 4|integrin alpha4 subunit|very late activation protein 4 receptor, alpha 4 subunit	CDS	CGGGAGCAGTAATGAATGCAA	103.513	156.885	172.778	92.5771	195.521	178.593
NM_000885.2-3671s1c1	TRCN0000029655	NM_000885	ITGA4	3676	269C wild type|antigen CD49D, alpha4 subunit of VLA4 receptor|integrin alpha 4|integrin alpha4 subunit|very late activation protein 4 receptor, alpha 4 subunit	CDS	CCAAACTGATAAGCTGTTCAA	70.7199	65.4058	104.064	56.0781	72.2009	94.2999
NM_000885.2-3207s1c1	TRCN0000029657	NM_000885	ITGA4	3676	269C wild type|antigen CD49D, alpha4 subunit of VLA4 receptor|integrin alpha 4|integrin alpha4 subunit|very late activation protein 4 receptor, alpha 4 subunit	CDS	CCCGTGGGTCTTTATTTCATT	98.3044	113.705	79.2652	86.4393	62.0482	65.9238
NM_000885.2-3624s1c1	TRCN0000029658	NM_000885	ITGA4	3676	269C wild type|antigen CD49D, alpha4 subunit of VLA4 receptor|integrin alpha 4|integrin alpha4 subunit|very late activation protein 4 receptor, alpha 4 subunit	CDS	GCTCCCAATGTTAGTGTGGAA	73.3964	67.0678	73.8918	61.2788	55.9508	56.8825
NM_000885.2-1710s1c1	TRCN0000029654	NM_000885	ITGA4	3676	269C wild type|antigen CD49D, alpha4 subunit of VLA4 receptor|integrin alpha 4|integrin alpha4 subunit|very late activation protein 4 receptor, alpha 4 subunit	CDS	GCTCCGTGTTATCAAGATTAT	98.4089	85.4139	98.768	98.6212	100.208	113.913
NM_004763.2-1272s1c1	TRCN0000122919	NM_004763	ITGB1BP1	9270	bodenin|integrin cytoplasmic domainassociated protein 1|integrin cytoplasmic domainassociated protein 1alpha|integrin cytoplasmic domainassociated protein 1beta	3UTR	CCAACCACAATTCCTAGAGTT	103.122	143.638	103.946	102.167	155.746	87.1845
NM_004763.3-423s21c1	TRCN0000319088	NM_004763	ITGB1BP1	9270	bodenin|integrin cytoplasmic domainassociated protein 1|integrin cytoplasmic domainassociated protein 1alpha|integrin cytoplasmic domainassociated protein 1beta	CDS	TGAAGGGCCATTAGACCTGAT	107.006	87.1212	43.3031	111.03	65.1774	32.6919
NM_004763.3-353s21c1	TRCN0000319016	NM_004763	ITGB1BP1	9270	bodenin|integrin cytoplasmic domainassociated protein 1|integrin cytoplasmic domainassociated protein 1alpha|integrin cytoplasmic domainassociated protein 1beta	CDS	CCTGTGCAGAATTTCGAATAA	48.0516	51.1602	66.2707	32.69	44.902	63.9993
NM_004763.3-465s21c1	TRCN0000319089	NM_004763	ITGB1BP1	9270	bodenin|integrin cytoplasmic domainassociated protein 1|integrin cytoplasmic domainassociated protein 1alpha|integrin cytoplasmic domainassociated protein 1beta	CDS	GCAAGATGGAAAGTTGCCTTT	71.1184	93.7034	85.1199	61.2525	76.955	71.0877
NM_004763.2-204s1c1	TRCN0000122920	NM_004763	ITGB1BP1	9270	bodenin|integrin cytoplasmic domainassociated protein 1|integrin cytoplasmic domainassociated protein 1alpha|integrin cytoplasmic domainassociated protein 1beta	CDS	GCAGTTCCCAAAGTAGCGAAA	69.9704	104.894	93.6733	49.2792	108.859	83.9356
NM_021999.2-910s1c1	TRCN0000063977	NM_021999	ITM2B	9445	BRICHOS domain containing 2B	CDS	GCAGAGAAACTATTAAAGGTA	78.4439	61.4832	69.1175	60.9977	77.1605	46.4501
NM_021999.4-999s21c1	TRCN0000333649	NM_021999	ITM2B	9445	BRICHOS domain containing 2B	CDS	CCGTGGAAACTTTAATTTGTT	96.4719	93.8735	108.819	80.114	70.7422	96.5254
NM_021999.4-752s21c1	TRCN0000333574	NM_021999	ITM2B	9445	BRICHOS domain containing 2B	CDS	CCCAGAAACCTACTGGAGTTA	79.1994	87.9683	95.0182	65.5425	71.4715	94.1608
NM_021999.4-344s21c1	TRCN0000333573	NM_021999	ITM2B	9445	BRICHOS domain containing 2B	CDS	CCAGATGATGTGGTACCAGTT	82.7922	99.1855	110.655	71.7272	90.4056	106.262
NM_021999.4-478s21c1	TRCN0000333648	NM_021999	ITM2B	9445	BRICHOS domain containing 2B	CDS	CGTGTACTACTGTGGAATAAA	72.5123	119.466	59.801	56.8746	86.4671	45.8937
NM_000214.2-2501s21c1	TRCN0000244410	NM_000214	JAG1	182	jagged 1|jagged1 (Alagille syndrome)	CDS	CCTACTGTGAAACCAATATTA	43.5626	77.5724	57.0694	18.5	70.5337	46.1068
NM_000214.2-2081s21c1	TRCN0000244411	NM_000214	JAG1	182	jagged 1|jagged1 (Alagille syndrome)	CDS	GTCAGCTGGACATCGATTATT	63.6541	90.1975	82.2768	52.1619	84.6894	116.003
NM_000214.1-4049s1c1	TRCN0000033443	NM_000214	JAG1	182	jagged 1|jagged1 (Alagille syndrome)	CDS	CCGAATGGAGTACATCGTATA	94.2781	49.5083	37.9737	84.6315	44.4873	28.3666
NM_000214.2-3357s21c1	TRCN0000244205	NM_000214	JAG1	182	jagged 1|jagged1 (Alagille syndrome)	CDS	GTGCACCTCTGACTCCTATTA	101.843	98.7332	83.7981	125.657	96.0654	105.891
NM_000214.2-1686s21c1	TRCN0000244412	NM_000214	JAG1	182	jagged 1|jagged1 (Alagille syndrome)	CDS	GGACCTGGTTAACGGATTTAA	87.5616	111.503	86.1851	51.2502	85.9248	72.8945
NM_025221.4-734s1c1	TRCN0000044541	NM_025221	KCNIP4	80333	atype potassium channel modulatory protein 4|calsenilinlike protein|potassium channel interacting protein 4|potassium channelinteracting protein 4	CDS	CCAGACAACACGTTGAAACAT	63.1048	116.884	84.244	51.3203	117.273	69.3464
NM_025221.4-263s1c1	TRCN0000044538	NM_025221	KCNIP4	80333	atype potassium channel modulatory protein 4|calsenilinlike protein|potassium channel interacting protein 4|potassium channelinteracting protein 4	CDS	CGTCGTCTCCTGCTATTCAAA	127.523	84.5778	78.8143	121.73	82.373	84.9578
NM_025221.4-415s1c1	TRCN0000044542	NM_025221	KCNIP4	80333	atype potassium channel modulatory protein 4|calsenilinlike protein|potassium channel interacting protein 4|potassium channelinteracting protein 4	CDS	CCCAGTGGTGTTGTTAATGAA	121.857	122.436	96.6772	164.578	114.854	87.6188
NM_025221.4-384s1c1	TRCN0000044540	NM_025221	KCNIP4	80333	atype potassium channel modulatory protein 4|calsenilinlike protein|potassium channel interacting protein 4|potassium channelinteracting protein 4	CDS	GATCCTTTACAGAGGATTTAA	75.9789	91.1496	82.0144	68.5019	91.0208	74.3137
NM_025221.4-790s1c1	TRCN0000044539	NM_025221	KCNIP4	80333	atype potassium channel modulatory protein 4|calsenilinlike protein|potassium channel interacting protein 4|potassium channelinteracting protein 4	CDS	GTTACCATAGATGAGTTCATT	68.453	98.6907	89.4901	67.5902	87.9323	87.4414
NM_018658.1-1300s1c1	TRCN0000044661	NM_018658	KCNJ16	3773	inward rectifier K+ channel KIR5.1|potassium inwardlyrectifying channel J16	CDS	GCCAAAGATAACTTTGAGATT	171.037	65.0973	89.2121	183.955	99.0158	95.5044
NM_018658.1-773s1c1	TRCN0000044660	NM_018658	KCNJ16	3773	inward rectifier K+ channel KIR5.1|potassium inwardlyrectifying channel J16	CDS	CCTTTCATCATGGCGATCTAT	130.348	121.531	171.746	134.428	159.263	189.472
NM_018658.1-1234s1c1	TRCN0000044658	NM_018658	KCNJ16	3773	inward rectifier K+ channel KIR5.1|potassium inwardlyrectifying channel J16	CDS	CCGGTAACTATTGTCCATGAA	154.917	112.539	143.381	177.688	185.656	155.467
NM_018658.1-896s1c1	TRCN0000044662	NM_018658	KCNJ16	3773	inward rectifier K+ channel KIR5.1|potassium inwardlyrectifying channel J16	CDS	GCTGTGTTACTGAAGAATGTT	195.3	111.626	108.763	220.382	130.36	96.7188
NM_018658.1-1664s1c1	TRCN0000044659	NM_018658	KCNJ16	3773	inward rectifier K+ channel KIR5.1|potassium inwardlyrectifying channel J16	CDS	CCACACATGAATATAGGGAAA	68.5118	110.214	76.4702	55.2119	66.3817	55.1242
NM_004521.1-3461s1c1	TRCN0000113871	NM_004521	KIF5B	3799	kinesin 1 (110120kD)|kinesin heavy chain	3UTR	GCCCTATTTATTACACAGTTT	113.973	133.142	111.186	105.006	127.573	92.5609
NM_004521.2-2049s21c1	TRCN0000338651	NM_004521	KIF5B	3799	kinesin 1 (110120kD)|kinesin heavy chain	CDS	TCGGCAACTTTAGCGAGTATA	106.483	83.7982	106.899	98.5338	71.3132	95.4313
NM_004521.2-1681s21c1	TRCN0000338582	NM_004521	KIF5B	3799	kinesin 1 (110120kD)|kinesin heavy chain	CDS	CAACCGCAATTGGAGTTATAG	68.5911	118.492	119.889	56.2372	100.452	102.607
NM_004521.2-1272s21c1	TRCN0000338579	NM_004521	KIF5B	3799	kinesin 1 (110120kD)|kinesin heavy chain	CDS	TTGGCTGAGGGTAGTACATAT	61.2026	129.425	52.8102	57.9909	155.985	48.07
NM_004521.1-1376s1c1	TRCN0000113872	NM_004521	KIF5B	3799	kinesin 1 (110120kD)|kinesin heavy chain	CDS	CGGAACACTATTCAGTGGCTT	76.1318	85.1557	101.105	60.9554	83.9454	88.6859
NM_022458.2-913s1c1	TRCN0000083459	NM_022458	LMBR1	64327	differentiationrelated gene 14|limb region 1 protein	CDS	GCTGTCTTCATCGGTGGAATA	95.7003	122.766	92.6099	73.5787	86.2687	100.629
NM_022458.2-216s1c1	TRCN0000083460	NM_022458	LMBR1	64327	differentiationrelated gene 14|limb region 1 protein	CDS	CCACGATATGTTTCCTTCTTT	135.388	124.599	109.22	146.884	157.497	101.034
NM_022458.2-2395s1c1	TRCN0000083458	NM_022458	LMBR1	64327	differentiationrelated gene 14|limb region 1 protein	3UTR	CCAGTGTTTAATACACTTGTA	67.0119	87.233	80.8395	63.1676	64.6383	75.115
NM_022458.2-1404s1c1	TRCN0000083461	NM_022458	LMBR1	64327	differentiationrelated gene 14|limb region 1 protein	CDS	GCGACTTTGGAAGGTTTAATT	209.236	140.349	187.55	250.614	183.591	172.445
NM_022458.2-713s1c1	TRCN0000083462	NM_022458	LMBR1	64327	differentiationrelated gene 14|limb region 1 protein	CDS	GAGTTCTATCTACCCTATTTA	58.7402	132.607	73.829	45.2453	126.941	56.351
NM_153371.2-445s1c1	TRCN0000007748	NM_153371	LNX2	222484	PDZ domain containing ring finger 1	CDS	GTTCATAAACTCCTAGACAAA	73.2688	120.622	183.462	59.2286	126.57	190.259
NM_153371.2-2414s1c1	TRCN0000007745	NM_153371	LNX2	222484	PDZ domain containing ring finger 1	3UTR	CCACTAACCTTTGTGAGTTTA	96.0411	110.613	105.77	91.4889	111.312	97.3396
NM_153371.2-1055s1c1	TRCN0000007747	NM_153371	LNX2	222484	PDZ domain containing ring finger 1	CDS	CCTGCAACACACTGCATCTTA	196.98	87.2206	99.4632	198.103	59.7764	81.853
NM_153371.2-1707s1c1	TRCN0000011197	NM_153371	LNX2	222484	PDZ domain containing ring finger 1	CDS	CGGCATTGATTTGACCAATTT	89.9875	114.099	59.2593	78.362	93.2277	54.2353
NM_153371.2-893s1c1	TRCN0000007746	NM_153371	LNX2	222484	PDZ domain containing ring finger 1	CDS	GCAACGAAACACCTTTGATTA	119.384	97.0562	75.3892	128.06	101.708	81.0787
XM_377949.1-208s1c1	TRCN0000048260	XM_377949	LOC402282	402282		CDS	GACAAGATACTCATGGAAGAA	58.6055	119.336	120.897	40.1221	87.7314	109.892
XM_377949.1-256s1c1	TRCN0000048258	XM_377949	LOC402282	402282		CDS	GCTGTGGAAGAAGATAAGCAA	139.058	145.052	109.856	154.58	187.917	135.562
XM_377949.1-186s1c1	TRCN0000048259	XM_377949	LOC402282	402282		CDS	GAGGACAGATACTCCCTCTAT	120.515	127.162	187.349	115.586	162.252	215.232
XM_377949.1-153s1c1	TRCN0000048261	XM_377949	LOC402282	402282		CDS	CACTTGGAAGAGGATGTGGAT	92.4657	156.622	105.08	74.3005	138.406	105.498
XM_377949.1-217s1c1	TRCN0000048262	XM_377949	LOC402282	402282		CDS	CTCATGGAAGAAGTCAAGTTA	65.5023	105.367	110.369	55.4112	89.967	98.445
NM_021177.3-309s1c1	TRCN0000074681	NM_021177	LSM2	57819	LSM2 homolog, U6 small nuclear RNA associated|U6 snRNAassociated Smlike protein	CDS	CAGTATCTCAACATCAAACTA	145.707	52.9301	68.6212	230.058	58.4389	73.7599
NM_021177.3-637s21c1	TRCN0000293602	NM_021177	LSM2	57819	LSM2 homolog, U6 small nuclear RNA associated|U6 snRNAassociated Smlike protein	3UTR	GAGTGGATGAGAGGAGTAATA	127.605	35.0859	95.2888	178.659	53.1519	126.718
NM_021177.3-362s21c1	TRCN0000286209	NM_021177	LSM2	57819	LSM2 homolog, U6 small nuclear RNA associated|U6 snRNAassociated Smlike protein	CDS	CCCTCACATGTTATCAGTGAA	104.846	122.942	125.985	92.2708	108.685	120.117
NM_021177.3-249s21c1	TRCN0000306800	NM_021177	LSM2	57819	LSM2 homolog, U6 small nuclear RNA associated|U6 snRNAassociated Smlike protein	CDS	GATGTGGTCGTGGAACTAAAG	90.2569	84.8654	82.7736	93.1058	83.7436	84.6674
NM_021177.3-441s1c1	TRCN0000074682	NM_021177	LSM2	57819	LSM2 homolog, U6 small nuclear RNA associated|U6 snRNAassociated Smlike protein	CDS	GACACACAGTTGCTACAGGAT	97.7976	108.67	134.601	102.5	128.662	172.932
NM_005908.2-1513s1c1	TRCN0000049625	NM_005908	MANBA	4126	mannanase|mannase	CDS	CCAATCTACATCAAGGACTAT	92.2352	86.2527	71.9158	87.7172	76.093	63.1374
NM_005908.2-264s1c1	TRCN0000049624	NM_005908	MANBA	4126	mannanase|mannase	CDS	CCAGGATTCTTACTACAGATT	142.883	127.571	169.965	148.309	115.06	170.643
NM_005908.2-2596s1c1	TRCN0000049623	NM_005908	MANBA	4126	mannanase|mannase	CDS	CCAGGGAGATTTAGTGACAAT	90.7609	101.564	115.406	87.8575	105.074	125.228
NM_005908.2-1185s1c1	TRCN0000049627	NM_005908	MANBA	4126	mannanase|mannase	CDS	CCGAGTAACCTCTGAGTTGTT	92.6014	63.2301	39.0754	69.0629	50.0981	23.2219
NM_005908.2-2127s1c1	TRCN0000049626	NM_005908	MANBA	4126	mannanase|mannase	CDS	GCTTCATTACTTTGCTCAGAA	133.122	125.641	210.412	121.87	148.416	269.101
NM_178450.2-920s1c1	TRCN0000073177	NM_178450	MARCH3	115123	membraneassociated RINGCH protein III	CDS	CAGAGGGTGATTCTCCTCATT	147.486	103.327	137.754	142.945	126.465	141.454
NM_178450.2-839s1c1	TRCN0000073175	NM_178450	MARCH3	115123	membraneassociated RINGCH protein III	CDS	CTCTTCACTATTTACCTCTTT	96.2388	88.3905	102.382	94.7792	107.881	104.454
NM_178450.2-838s1c1	TRCN0000073176	NM_178450	MARCH3	115123	membraneassociated RINGCH protein III	CDS	ACTCTTCACTATTTACCTCTT	65.7608	116.425	80.1157	55.1878	86.5546	74.9652
NM_178450.2-1581s1c1	TRCN0000073173	NM_178450	MARCH3	115123	membraneassociated RINGCH protein III	3UTR	GCAGAACAAGTCATATTTGAA	84.8417	126.36	83.9428	71.2587	104.468	89.7096
NM_178450.2-377s1c1	TRCN0000073174	NM_178450	MARCH3	115123	membraneassociated RINGCH protein III	CDS	CCGCAGTATGTCATGCAAGTT	85.123	125.125	106.944	63.0124	135.801	117.807
NM_018328.3-1660s21c1	TRCN0000298783	NM_018328	MBD5	55777		CDS	CCCAAAGATCACGCTCATCTT	142.011	130.047	133.395	117.352	104.633	121.683
NM_018328.3-4826s21c1	TRCN0000295941	NM_018328	MBD5	55777		3UTR	TGTATCTGTATATAGGTATTG	82.3128	108.803	131.079	57.6768	101.947	119.04
NM_018328.3-1730s21c1	TRCN0000295983	NM_018328	MBD5	55777		CDS	GGCCACTTCTAGTGGTATTAA	116.884	76.9811	74.7438	87.4707	64.378	60.4913
NM_018328.3-1847s21c1	TRCN0000295991	NM_018328	MBD5	55777		CDS	GGATATCCCTAACCCATTAAT	116.327	69.7482	130.723	110.858	126.248	168.073
NM_018328.3-966s21c1	TRCN0000295940	NM_018328	MBD5	55777		CDS	TCATCAGGTTCCCAGATATAT	124.007	42.6468	102.893	140.213	65.3372	119.436
NM_000242.1-715s1c1	TRCN0000057129	NM_000242	MBL2	4153	mannanbinding lectin|mannosebinding lectin 2, soluble (opsonic defect)|mannosebinding protein C|soluble mannosebinding lectin	CDS	GTTCTGATGAAGATTGTGTAT	136.173	109.052	165.01	152.382	153.608	184.359
NM_000242.1-410s1c1	TRCN0000057128	NM_000242	MBL2	4153	mannanbinding lectin|mannosebinding lectin 2, soluble (opsonic defect)|mannosebinding protein C|soluble mannosebinding lectin	CDS	GCAAACAGAAATGGCACGTAT	50.3633	132.811	135.687	39.0468	103.44	142.153
NM_000242.1-111s1c1	TRCN0000057131	NM_000242	MBL2	4153	mannanbinding lectin|mannosebinding lectin 2, soluble (opsonic defect)|mannosebinding protein C|soluble mannosebinding lectin	CDS	GCAGCGTCTTACTCAGAAACT	116.803	80.3175	77.5028	139.618	111.22	92.4322
NM_000242.1-659s1c1	TRCN0000057130	NM_000242	MBL2	4153	mannanbinding lectin|mannosebinding lectin 2, soluble (opsonic defect)|mannosebinding protein C|soluble mannosebinding lectin	CDS	GACAGGAAATAGACTGACCTA	56.2309	82.8004	73.9081	41.1975	40.7833	57.8587
NM_000242.1-482s1c1	TRCN0000057132	NM_000242	MBL2	4153	mannanbinding lectin|mannosebinding lectin 2, soluble (opsonic defect)|mannosebinding protein C|soluble mannosebinding lectin	CDS	CCTGACCAATGGTGAAATAAT	111.511	133.619	152.189	107.544	164.607	138.338
XM_371801.2-695s1c1	TRCN0000035318	XM_371801	MBOAT1	154141	Oacyltransferase (membrane bound) domain containing 1|OTTHUMP00000016082|lysophosphatidylethanolamine acyltransferase 1|lysophospholipid acyltransferase	CDS	GCTGGTACTCTGTGCATCTTT	96.1477	89.4767	72.1375	63.0816	115.089	68.3313
XM_371801.2-1900s1c1	TRCN0000035315	XM_371801	MBOAT1	154141	Oacyltransferase (membrane bound) domain containing 1|OTTHUMP00000016082|lysophosphatidylethanolamine acyltransferase 1|lysophospholipid acyltransferase	CDS	CCTCAGACTCTGAACTCTATT	127.248	85.0722	94.5052	105.493	77.1203	72.7336
XM_371801.2-970s1c1	TRCN0000035316	XM_371801	MBOAT1	154141	Oacyltransferase (membrane bound) domain containing 1|OTTHUMP00000016082|lysophosphatidylethanolamine acyltransferase 1|lysophospholipid acyltransferase	CDS	CGACTTGCTATCAAAGTGAAA	70.0081	69.1049	100.994	52.6672	53.7953	104.764
XM_371801.2-826s1c1	TRCN0000035314	XM_371801	MBOAT1	154141	Oacyltransferase (membrane bound) domain containing 1|OTTHUMP00000016082|lysophosphatidylethanolamine acyltransferase 1|lysophospholipid acyltransferase	CDS	CGAATATACATCTTCCACTAT	72.7527	110.34	99.0727	60.1128	81.3738	91.7092
XM_371801.2-1398s1c1	TRCN0000035317	XM_371801	MBOAT1	154141	Oacyltransferase (membrane bound) domain containing 1|OTTHUMP00000016082|lysophosphatidylethanolamine acyltransferase 1|lysophospholipid acyltransferase	CDS	CGGAGTGGATAAGAATGGGAA	101.877	117.719	72.0735	104.787	103.165	56.3387
NM_014632.2-3418s21c1	TRCN0000257045	NM_014632	MICAL2	9645	flavoprotein oxidoreductase MICAL2	CDS	GACTGCGATGAAGGCAAATTT	173.75	167.514	221.14	204.189	259.611	270.103
NM_014632.2-3285s1c1	TRCN0000046581	NM_014632	MICAL2	9645	flavoprotein oxidoreductase MICAL2	CDS	CGACACGTGTTACTTCTGTAA	157.708	97.9716	168.35	159.696	131.587	184.857
NM_014632.2-473s21c1	TRCN0000233087	NM_014632	MICAL2	9645	flavoprotein oxidoreductase MICAL2	CDS	CCAAAGCCCTGTGGTACAAAT	84.7054	85.6565	157.429	76.8958	81.516	159.218
NM_014632.2-1644s1c1	TRCN0000046579	NM_014632	MICAL2	9645	flavoprotein oxidoreductase MICAL2	CDS	CCCGGAGAACATCAACAAGAA	82.909	117.675	92.756	82.7318	144.537	114.678
NM_014632.2-3679s21c1	TRCN0000233090	NM_014632	MICAL2	9645	flavoprotein oxidoreductase MICAL2	3UTR	AGAGTCTCCCTCCCTTTATAG	61.2029	90.1441	57.0878	50.3929	53.347	46.3498
NM_172250.1-963s1c1	TRCN0000078676	NM_172250	MMAA	166785	methylmalonic aciduria type A	CDS	CGAAGGATACAAGCGGAATAT	141.635	111.892	101.16	137.888	129.88	82.488
NM_172250.1-765s1c1	TRCN0000078674	NM_172250	MMAA	166785	methylmalonic aciduria type A	CDS	GCGGGATATGACATAATTCTT	76.6135	116.979	110.695	70.8406	107.941	106.886
NM_172250.1-766s1c1	TRCN0000078675	NM_172250	MMAA	166785	methylmalonic aciduria type A	CDS	CGGGATATGACATAATTCTTA	118.586	114.365	92.0874	114.931	116.854	90.929
NM_172250.1-649s1c1	TRCN0000078677	NM_172250	MMAA	166785	methylmalonic aciduria type A	CDS	CCCGAATGACTGAGTTATCAA	98.3414	64.8425	94.9803	93.7976	92.0238	109.661
NM_172250.1-990s1c1	TRCN0000078673	NM_172250	MMAA	166785	methylmalonic aciduria type A	CDS	GCACTGAAATTACTCCGCAAA	189.856	135.141	70.8268	194.229	117.42	52.1928
NM_147191.1-1310s1c1	TRCN0000050937	NM_147191	MMP21	118856	matrix metalloproteinase 21	CDS	CCAAATTGATTTCAGAAGGAT	92.3946	76.6915	126.99	81.4601	97.9349	125.258
NM_147191.1-1620s1c1	TRCN0000050936	NM_147191	MMP21	118856	matrix metalloproteinase 21	CDS	GCTTCCTGCTAATGGCTTATT	73.2156	93.4654	151.897	58.9347	110.835	154.405
NM_147191.1-1108s1c1	TRCN0000050935	NM_147191	MMP21	118856	matrix metalloproteinase 21	CDS	CGAAACAATAGGACACGCTAT	84.3179	78.6638	113.33	68.171	110.277	89.8876
NM_147191.1-1524s1c1	TRCN0000050934	NM_147191	MMP21	118856	matrix metalloproteinase 21	CDS	CGCTTATTACTCCTATGCATA	116.277	125.507	105.326	80.0463	113.834	98.5405
NM_147191.1-1371s1c1	TRCN0000050933	NM_147191	MMP21	118856	matrix metalloproteinase 21	CDS	CCGAAGACAGAAGTTAATTTA	110.234	117.612	133.841	98.142	116.065	150.458
NM_018133.3-1656s21c1	TRCN0000294337	NM_018133	MSL2	55167	malespecific lethal2 homolog|ring finger protein 184	CDS	CCCAGTCTCTTAGCCATAATG	113.197	153.745	96.6579	99.1277	131.758	87.5757
NM_018133.2-1367s1c1	TRCN0000037032	NM_018133	MSL2	55167	malespecific lethal2 homolog|ring finger protein 184	CDS	CCTGAACATTCAAATACGATT	162.277	146.784	170.026	177.958	120.491	157.301
NM_018133.2-1793s1c1	TRCN0000037029	NM_018133	MSL2	55167	malespecific lethal2 homolog|ring finger protein 184	CDS	CCACTTCCAATTTCTACCATT	104.971	97.8397	81.2346	98.7537	101.89	67.9185
NM_018133.3-2546s21c1	TRCN0000294296	NM_018133	MSL2	55167	malespecific lethal2 homolog|ring finger protein 184	3UTR	TTGCCGGAGCTCCTGCATATA	86.9466	95.593	58.382	74.3005	83.1707	37.5077
NM_018133.2-2177s1c1	TRCN0000037033	NM_018133	MSL2	55167	malespecific lethal2 homolog|ring finger protein 184	CDS	CCTTGCTACTCTAACCGCAAA	67.6905	87.5196	126.82	58.1231	73.7513	136.834
NM_005377.2-1215s1c1	TRCN0000020629	NM_005377	MYCL2	4611		3UTR	GCCTGACCATTCTGTCTTAAA	97.3946	110.881	104.152	82.1731	121.065	92.0135
NM_005377.2-921s1c1	TRCN0000020632	NM_005377	MYCL2	4611		CDS	CCAAACCCATCCATTATGATA	88.1146	96.5498	76.6023	76.6559	96.873	59.8554
NM_005377.2-1088s1c1	TRCN0000020630	NM_005377	MYCL2	4611		CDS	GCCACGGAATACTTACATGAA	85.4067	155.838	180.844	76.9696	211.396	209.772
NM_005377.2-628s1c1	TRCN0000020633	NM_005377	MYCL2	4611		CDS	CGTGACAGTAAAGAAGAGGCA	108.403	106.392	95.6601	109.316	119.256	80.5615
NM_005377.2-1053s1c1	TRCN0000020631	NM_005377	MYCL2	4611		CDS	GCTCTAGGGTTTCCAAAGTAA	80.1612	104.34	62.863	52.2345	94.6852	52.9148
NM_016100.3-253s21c1	TRCN0000290708	NM_016100	NAA20	51126	Nacetyltransferase 3 homolog|Nacetyltransferase 5 (ARD1 homolog, S. cerevisiae)|Nacetyltransferase 5, ARD1 subunit (arrestdefective 1, S. cerevisiae, homolog)|Nterminal acetyltransferase complex ARD1 subunit|dJ1002M8.1 (Nterminal acetyltransferase complex	CDS	GTGGAGAATTAATGGGTTATA	70.8004	118.797	102.957	55.1934	116.232	88.5424
NM_016100.2-546s1c1	TRCN0000035542	NM_016100	NAA20	51126	Nacetyltransferase 3 homolog|Nacetyltransferase 5 (ARD1 homolog, S. cerevisiae)|Nacetyltransferase 5, ARD1 subunit (arrestdefective 1, S. cerevisiae, homolog)|Nterminal acetyltransferase complex ARD1 subunit|dJ1002M8.1 (Nterminal acetyltransferase complex	CDS	GACGCTTATGATATGAGGAAA	87.5767	132.881	118.424	72.3959	122.609	109.496
NM_016100.2-369s1c1	TRCN0000035539	NM_016100	NAA20	51126	Nacetyltransferase 3 homolog|Nacetyltransferase 5 (ARD1 homolog, S. cerevisiae)|Nacetyltransferase 5, ARD1 subunit (arrestdefective 1, S. cerevisiae, homolog)|Nterminal acetyltransferase complex ARD1 subunit|dJ1002M8.1 (Nterminal acetyltransferase complex	CDS	GCTGCTAAACTTATGGAGTTA	100.253	92.6187	73.1232	96.0704	85.9229	59.1209
NM_016100.3-574s21c1	TRCN0000290706	NM_016100	NAA20	51126	Nacetyltransferase 3 homolog|Nacetyltransferase 5 (ARD1 homolog, S. cerevisiae)|Nacetyltransferase 5, ARD1 subunit (arrestdefective 1, S. cerevisiae, homolog)|Nterminal acetyltransferase complex ARD1 subunit|dJ1002M8.1 (Nterminal acetyltransferase complex	CDS	CCAGGGATACTGAGAAGAAAT	97.8483	80.0667	88.7619	91.2269	78.5777	63.4265
NM_016100.3-143s21c1	TRCN0000290705	NM_016100	NAA20	51126	Nacetyltransferase 3 homolog|Nacetyltransferase 5 (ARD1 homolog, S. cerevisiae)|Nacetyltransferase 5, ARD1 subunit (arrestdefective 1, S. cerevisiae, homolog)|Nterminal acetyltransferase complex ARD1 subunit|dJ1002M8.1 (Nterminal acetyltransferase complex	CDS	CCGCTTCAACAACATTAACTT	46.0923	85.8817	49.3206	32.8133	77.3266	37.1625
NM_006540.1-4500s1c1	TRCN0000019643	NM_006540	NCOA2	10499	MYST3/NCOA2 fusion protein|glucocorticoid receptorinteracting protein1	CDS	GCTGCCTGGAATGGATATGAT	127.576	95.6895	60.4787	98.7426	84.3489	77.0608
NM_006540.1-1193s1c1	TRCN0000019639	NM_006540	NCOA2	10499	MYST3/NCOA2 fusion protein|glucocorticoid receptorinteracting protein1	CDS	GCACTCTTGTTGCTGCACAAA	123.484	104.408	135.506	117.615	84.7525	140.64
NM_006540.1-1727s1c1	TRCN0000019642	NM_006540	NCOA2	10499	MYST3/NCOA2 fusion protein|glucocorticoid receptorinteracting protein1	CDS	GCACAGGAAATAGCCATAGTT	133.393	68.9522	91.9715	151.06	61.6676	85.5285
NM_006540.1-361s1c1	TRCN0000019641	NM_006540	NCOA2	10499	MYST3/NCOA2 fusion protein|glucocorticoid receptorinteracting protein1	CDS	CCTGACAAATGTGCAATCTTA	88.2577	63.6526	70.1291	75.0682	54.0802	53.5237
NM_006540.1-2911s1c1	TRCN0000019640	NM_006540	NCOA2	10499	MYST3/NCOA2 fusion protein|glucocorticoid receptorinteracting protein1	CDS	CCAGGAATGATGGGTAATCAA	67.5698	120.452	140.115	47.1766	122.367	139.779
NM_004551.1-546s21c1	TRCN0000229627	NM_004551	NDUFS3	4722		CDS	TGCTAACCACCCTGATCTAAG	129.867	128.995	163.23	136.948	193.537	160.511
NM_004551.1-691s21c1	TRCN0000229629	NM_004551	NDUFS3	4722		CDS	GCCCAAGAGTTCCGCAAATTT	114.259	134.894	131.762	94.9666	120.193	121.98
NM_004551.1-628s21c1	TRCN0000229628	NM_004551	NDUFS3	4722		CDS	GGCTATGTTGAGTTACGTTAT	133.219	144.54	180.239	113.849	110.215	181.793
NM_004551.1-320s21c1	TRCN0000218593	NM_004551	NDUFS3	4722		CDS	ACACCAATGCACAGTTCAAAT	141.691	72.4278	170.381	269.965	85.5043	145.488
NM_004551.1-195s21c1	TRCN0000229626	NM_004551	NDUFS3	4722		CDS	TGGAGAGTATGTGGCTGAAAT	85.766	97.4914	90.5339	76.9748	106.568	94.2999
NM_032815.2-560s1c1	TRCN0000073134	NM_032815	NFATC2IP	84901		CDS	CTGAGGACTAAGGATAAAGAA	103.407	143.566	89.5134	82.3807	137.918	78.7299
NM_032815.2-951s1c1	TRCN0000073136	NM_032815	NFATC2IP	84901		CDS	GAGAGACAGAGCTATCACCTA	86.6666	91.1367	78.3426	88.6554	89.7334	91.4176
NM_032815.2-277s1c1	TRCN0000073137	NM_032815	NFATC2IP	84901		CDS	CCGGGATAACAGCAACAGTGA	122.462	129.581	99.544	142.363	124.521	110.581
NM_032815.2-673s1c1	TRCN0000073135	NM_032815	NFATC2IP	84901		CDS	CAAGAAGTTAAGTGAGGTGAA	78.0061	98.9487	71.2874	65.7506	68.3747	49.5217
NM_000271.1-1685s1c1	TRCN0000005432	NM_000271	NPC1	4864		CDS	CCTCTCTGAATGATACAAGTT	0.566794	0.830975	5.1624	0.877688	1.42731	1.84064
NM_000271.1-4323s1c1	TRCN0000005428	NM_000271	NPC1	4864		3UTR	CCACAAGTTCTATACCATATT	210.701	93.4906	87.8248	234.19	72.0996	74.0998
NM_000271.1-3295s1c1	TRCN0000005429	NM_000271	NPC1	4864		CDS	GCCCGACTTATAGCCAGTAAT	122.486	130.063	94.0143	131.412	112.509	92.0128
NM_000271.1-3856s1c1	TRCN0000005431	NM_000271	NPC1	4864		CDS	CCTGTCTTACTCAGTTACATA	0.748664	1.9778	0.466884	0.877688	5.05332	0.170781
NM_000271.1-517s1c1	TRCN0000005430	NM_000271	NPC1	4864		CDS	CCTGTTACAAACCAGACGAAA	161.778	135.476	94.3772	177.358	87.0221	80.6275
NM_022837.1-725s1c1	TRCN0000134678	NM_022837	OBFC2A	64859		CDS	GAAAGGATGTCTGACACTTTA	54.6667	57.5197	83.0491	41.7586	53.9884	67.2247
NM_022837.1-687s1c1	TRCN0000134695	NM_022837	OBFC2A	64859		CDS	GATATTATTCGGTTGACCAGA	112.678	103.903	103.556	86.8777	87.016	78.7878
NM_022837.1-607s1c1	TRCN0000136083	NM_022837	OBFC2A	64859		CDS	GATCGTGCAAAGTAGCAGATA	80.147	86.8057	117.251	64.9961	65.2261	91.8541
NM_022837.1-818s1c1	TRCN0000135218	NM_022837	OBFC2A	64859		CDS	CATACACTACTACCCTGGTAA	58.0139	99.6613	82.8437	44.4237	91.219	69.3061
NM_022837.1-600s1c1	TRCN0000135972	NM_022837	OBFC2A	64859		CDS	GAAGTGAGATCGTGCAAAGTA	114.502	99.5825	100.749	99.829	81.7399	92.8947
NM_181672.1-968s21c1	TRCN0000286199	NM_181672	OGT	8473	OGlcNAc transferase p110 subunit|Olinked GlcNAc transferase|uridinediphosphoNacetylglucosamine:polypeptide betaNacetylglucosaminyl transferase	CDS	GCCCTAAGTTTGAGTCCAAAT	134.178	79.591	46.8825	121.451	80.9132	39.7469
NM_181672.1-3458s21c1	TRCN0000298541	NM_181672	OGT	8473	OGlcNAc transferase p110 subunit|Olinked GlcNAc transferase|uridinediphosphoNacetylglucosamine:polypeptide betaNacetylglucosaminyl transferase	3UTR	TGTTGCAGATGGGTGATATAT	164.851	86.7387	131.486	165.995	108.197	111.293
NM_181672.1-881s21c1	TRCN0000286201	NM_181672	OGT	8473	OGlcNAc transferase p110 subunit|Olinked GlcNAc transferase|uridinediphosphoNacetylglucosamine:polypeptide betaNacetylglucosaminyl transferase	CDS	CCAAACTTTCTGGATGCTTAT	120.822	82.2957	63.2137	123.162	69.2203	59.3208
NM_181672.1-2282s1c1	TRCN0000035067	NM_181672	OGT	8473	OGlcNAc transferase p110 subunit|Olinked GlcNAc transferase|uridinediphosphoNacetylglucosamine:polypeptide betaNacetylglucosaminyl transferase	CDS	GCTGAGCAGTATTCCGAGAAA	134.581	111.697	77.9516	154.68	119.146	81.1896
NM_181672.1-446s21c1	TRCN0000293652	NM_181672	OGT	8473	OGlcNAc transferase p110 subunit|Olinked GlcNAc transferase|uridinediphosphoNacetylglucosamine:polypeptide betaNacetylglucosaminyl transferase	CDS	TTTAGCACTCTGGCAATTAAA	89.8255	106.566	95.6172	75.6228	104.954	90.5041
NM_001005194.1-561s1c1	TRCN0000061101	NM_001005194	OR8A1	390275	olfactory receptor OR11318	CDS	GCACCTCATCAGTCACTACTT	105.712	92.2836	202.029	99.8688	82.3551	219.684
NM_001005194.1-677s1c1	TRCN0000061098	NM_001005194	OR8A1	390275	olfactory receptor OR11318	CDS	CGAGCTTAACAGTTCTTGTTT	118.447	126.072	114.607	95.1702	114.248	88.6929
NM_001005194.1-436s1c1	TRCN0000061099	NM_001005194	OR8A1	390275	olfactory receptor OR11318	CDS	CCTTTGCTTTACAACATCATT	114.503	115.821	122.774	119.196	109.537	127.28
NM_001005194.1-186s1c1	TRCN0000061100	NM_001005194	OR8A1	390275	olfactory receptor OR11318	CDS	GATCACTCTAATTTGTCTGAA	120.541	116.478	104.951	123.168	146.503	147.026
NM_001005194.1-798s1c1	TRCN0000061102	NM_001005194	OR8A1	390275	olfactory receptor OR11318	CDS	GTTCTATGGATCAACTGCATT	171.617	43.984	59.4082	217.624	46.1132	62.3657
NM_018936.2-1182s21c1	TRCN0000365320	NM_018936	PCDHB2	56133		CDS	ACTAACTATGTCGACACTTAT	88.2649	103.987	116.593	77.6987	93.6314	121.982
NM_018936.2-2554s21c1	TRCN0000365317	NM_018936	PCDHB2	56133		3UTR	TGAGGCTAGTCTCGTTTAATT	136.855	140.148	153.514	146.843	171.805	167.047
NM_018936.2-174s21c1	TRCN0000370498	NM_018936	PCDHB2	56133		CDS	ACAAAGGCAAGTCCTGATATT	92.5604	90.1504	103.496	82.2916	81.5642	93.9961
NM_018936.2-505s21c1	TRCN0000365391	NM_018936	PCDHB2	56133		CDS	CTACGGATTAGGGACGTAAAT	100.796	92.1976	126.178	98.4503	90.8466	123.131
NM_018936.2-694s21c1	TRCN0000365321	NM_018936	PCDHB2	56133		CDS	GACAGTCTCGATGGCATAATA	116.341	101.534	102.548	104.964	104.528	90.9822
NM_001003683.1-1839s1c1	TRCN0000048748	NM_001003683	PDE1A	5136	3',5' cyclic nucleotide phosphodiesterase|calcium/calmodulinstimulated cyclic nucleotide phosphodiesterase|calmodulindependent phosphodiesterase|phosphodiesterase1A	3UTR	CCACATAAATAACAGCTGTAA	76.6333	87.5746	97.2992	62.1525	95.2968	86.6597
NM_001003683.1-173s1c1	TRCN0000048750	NM_001003683	PDE1A	5136	3',5' cyclic nucleotide phosphodiesterase|calcium/calmodulinstimulated cyclic nucleotide phosphodiesterase|calmodulindependent phosphodiesterase|phosphodiesterase1A	CDS	GCCTGAAAGGAATACTAAGAT	110.671	123.532	108.078	96.7731	110.548	105.295
NM_001003683.1-231s1c1	TRCN0000048752	NM_001003683	PDE1A	5136	3',5' cyclic nucleotide phosphodiesterase|calcium/calmodulinstimulated cyclic nucleotide phosphodiesterase|calmodulindependent phosphodiesterase|phosphodiesterase1A	CDS	CGTCGACTTAAAGAAGAATAT	68.4748	76.7433	99.3302	52.6746	76.8798	82.4305
NM_001003683.1-1523s1c1	TRCN0000048749	NM_001003683	PDE1A	5136	3',5' cyclic nucleotide phosphodiesterase|calcium/calmodulinstimulated cyclic nucleotide phosphodiesterase|calmodulindependent phosphodiesterase|phosphodiesterase1A	CDS	CCATGAGTGATGGGTCCTATT	78.0689	106.414	69.0782	65.3118	104.441	47.5393
NM_001003683.1-976s1c1	TRCN0000048751	NM_001003683	PDE1A	5136	3',5' cyclic nucleotide phosphodiesterase|calcium/calmodulinstimulated cyclic nucleotide phosphodiesterase|calmodulindependent phosphodiesterase|phosphodiesterase1A	CDS	CGACTTATGCAAGAAGAAGAA	118.689	96.7566	79.5541	108.884	87.719	68.6855
NM_018441.2-321s1c1	TRCN0000046542	NM_018441	PECR	55825	peroxisomal trans 2enoyl CoA reductase|putative short chain alcohol dehydrogenase	CDS	GAGGTGAATAATTTGGTCAAA	168.616	85.0558	117.034	139.478	109.077	93.048
NM_018441.2-279s1c1	TRCN0000046540	NM_018441	PECR	55825	peroxisomal trans 2enoyl CoA reductase|putative short chain alcohol dehydrogenase	CDS	GCACGAGTCATTCCCATACAA	65.8091	100.997	61.4826	54.813	119.288	71.6269
NM_018441.2-605s1c1	TRCN0000046539	NM_018441	PECR	55825	peroxisomal trans 2enoyl CoA reductase|putative short chain alcohol dehydrogenase	CDS	CCTCACCAAATCTTTAGCTTT	126.572	120.241	174.866	107.992	104.03	163.153
NM_018441.2-750s1c1	TRCN0000046541	NM_018441	PECR	55825	peroxisomal trans 2enoyl CoA reductase|putative short chain alcohol dehydrogenase	CDS	CCCGCTAAACGAATTGGTGTT	125.471	84.6978	44.8792	116.238	94.7818	33.9313
NM_018441.2-637s1c1	TRCN0000046538	NM_018441	PECR	55825	peroxisomal trans 2enoyl CoA reductase|putative short chain alcohol dehydrogenase	CDS	GCAGTGGAATACGGATCAATT	84.9864	82.4693	83.073	70.0405	79.6403	71.3487
NM_012393.2-4291s21c1	TRCN0000294457	NM_012393	PFAS	5198	FGAM synthase|FGAR amidotransferase|formylglycinamide ribotide amidotransferase|formylglycinamide ribotide synthetase|phosphoribosylformylglycinamidine synthase	3UTR	ATCTCAGCGGACTCGATAATC	64.9571	59.9014	86.9001	53.7354	63.9154	101.533
NM_012393.2-948s21c1	TRCN0000287000	NM_012393	PFAS	5198	FGAM synthase|FGAR amidotransferase|formylglycinamide ribotide amidotransferase|formylglycinamide ribotide synthetase|phosphoribosylformylglycinamidine synthase	CDS	CTGTGATAACAGCAGTGCAAT	127.866	115.741	119.875	116.894	74.5932	112.939
NM_012393.1-1432s1c1	TRCN0000036210	NM_012393	PFAS	5198	FGAM synthase|FGAR amidotransferase|formylglycinamide ribotide amidotransferase|formylglycinamide ribotide synthetase|phosphoribosylformylglycinamidine synthase	CDS	GCCAGGCATGGAAGTTGTAAA	110.529	132.885	174.228	101.854	187.031	208.36
NM_012393.2-249s21c1	TRCN0000287002	NM_012393	PFAS	5198	FGAM synthase|FGAR amidotransferase|formylglycinamide ribotide amidotransferase|formylglycinamide ribotide synthetase|phosphoribosylformylglycinamidine synthase	CDS	CGAGACTGAACTGTGCTACAA	128.718	123.613	142.799	129.638	138.076	144.514
NM_012393.2-4113s21c1	TRCN0000287071	NM_012393	PFAS	5198	FGAM synthase|FGAR amidotransferase|formylglycinamide ribotide amidotransferase|formylglycinamide ribotide synthetase|phosphoribosylformylglycinamidine synthase	CDS	GCTCTTTATCAATGCCCGAAA	72.9383	97.3418	70.2773	62.825	84.3665	57.578
NM_001040444.1-512s21c1	TRCN0000378317	NM_001040444	PHF11	51131	IgE responsiveness (atopic)|NYREN34 antigen	CDS	CCACCGTGGGATGTGATTTAA	103.673	108.68	96.31	131.618	117.994	98.9725
NM_016119.1-156s1c1	TRCN0000020109	NM_016119	PHF11	51131	IgE responsiveness (atopic)|NYREN34 antigen	CDS	CCCAAAGATGTCGAATATAAT	154.611	95.528	114.33	115.488	81.4464	80.7001
NM_001040444.1-652s21c1	TRCN0000358520	NM_001040444	PHF11	51131	IgE responsiveness (atopic)|NYREN34 antigen	CDS	ATCGCTCAAAGTGCTAAATTT	176.899	150.985	115.196	214.089	176.572	121.325
NM_016119.1-503s1c1	TRCN0000020113	NM_016119	PHF11	51131	IgE responsiveness (atopic)|NYREN34 antigen	CDS	CATCGCTCAAAGTGCTAAATT	99.1733	99.6853	75.7979	91.925	98.9995	67.5724
NM_016119.1-167s1c1	TRCN0000020112	NM_016119	PHF11	51131	IgE responsiveness (atopic)|NYREN34 antigen	CDS	CGAATATAATGTCCTGTACTT	82.8302	81.9168	88.572	72.92	74.1885	68.8142
NM_015184.x-846s1c1	TRCN0000001741	NM_015184	PLCL2	23228	phospholipase C, epsilon 2	CDS	CCGAGGTCACAAAGGAAGAAT	94.5582	98.4811	130.384	78.0229	83.7686	153.737
NM_015184.4-2492s21c1	TRCN0000235479	NM_015184	PLCL2	23228	phospholipase C, epsilon 2	CDS	ATTTGTCCACGTGGCTATTAC	59.6625	150.689	102.868	49.8799	205.288	95.1457
NM_015184.4-3696s21c1	TRCN0000235480	NM_015184	PLCL2	23228	phospholipase C, epsilon 2	3UTR	CATGCTTGCTGAGCCATAATT	104.922	120.476	63.8174	101.031	112.979	53.2028
NM_015184.4-978s21c1	TRCN0000235477	NM_015184	PLCL2	23228	phospholipase C, epsilon 2	CDS	GAACAGGGTGTGGCACATATA	78.7277	108.109	95.947	77.3932	108.558	104.696
NM_015184.4-1357s21c1	TRCN0000235478	NM_015184	PLCL2	23228	phospholipase C, epsilon 2	CDS	TCCGCAGTGTCATTGATATTA	83.7465	109.451	78.4031	64.3631	104.753	61.9786
NM_033123.x-612s1c1	TRCN0000001547	NM_033123	PLCZ1	89869	PIphospholipase C zeta 1|testisdevelopment related NYDSP27	CDS	CGTGAATGTCTACTGTTTAAA	99.9132	117.413	118.338	91.5398	100.249	92.5008
NM_033123.x-1864s1c1	TRCN0000001548	NM_033123	PLCZ1	89869	PIphospholipase C zeta 1|testisdevelopment related NYDSP27	CDS	GTCAAGGTTTAATAGCAGGAA	103.345	121.635	116.777	100.971	115.009	107.564
NM_033123.x-1980s1c1	TRCN0000001545	NM_033123	PLCZ1	89869	PIphospholipase C zeta 1|testisdevelopment related NYDSP27	CDS	CCTGCTTCACTGTTTGTTTAT	124.016	121.546	129.154	136.273	134.017	125.876
NM_033123.x-1672s1c1	TRCN0000001549	NM_033123	PLCZ1	89869	PIphospholipase C zeta 1|testisdevelopment related NYDSP27	CDS	TGCCTCTTACTCATTCATCAT	70.169	151.667	98.3121	64.1636	197.153	83.4925
NM_033123.x-358s1c1	TRCN0000001546	NM_033123	PLCZ1	89869	PIphospholipase C zeta 1|testisdevelopment related NYDSP27	CDS	CCATAGAAGAATTTAGAGCAA	69.4243	85.1473	86.1608	61.7809	83.1419	80.2437
NM_001122.2-1087s1c1	TRCN0000136605	NM_001122	PLIN2	123	adipophilin	CDS	CTGAGCACATTGAGTCACGTA	88.8729	69.5144	129.871	68.548	86.2899	107.042
NM_001122.2-474s1c1	TRCN0000136481	NM_001122	PLIN2	123	adipophilin	CDS	CAGCCATCAACTCAGATTGTT	119.882	125.098	144.534	102.053	92.6354	140.135
NM_001122.2-1572s21c1	TRCN0000350647	NM_001122	PLIN2	123	adipophilin	3UTR	CCCTAAATTGGGAAGCAAGTA	127.372	112.861	93.31	134.381	141.621	115.087
NM_001122.2-387s21c1	TRCN0000322997	NM_001122	PLIN2	123	adipophilin	CDS	CAGAAGCTAGAGCCGCAAATT	121.568	94.0577	117.556	119.442	80.293	122.829
NM_001122.2-1330s21c1	TRCN0000323071	NM_001122	PLIN2	123	adipophilin	CDS	CTTTAGATGACGTGATGGATT	66.9741	118.028	131.963	52.7614	93.786	121.159
NM_006347.3-518s21c1	TRCN0000289678	NM_006347	PPIH	10465	PPIase h|UsnRNPassociated cyclophilin SunCyp20|USACyP SnuCyp20|cyclophilin H|peptidyl prolyl isomerase H (cyclophilin H)|peptidylprolyl cistrans isomerase H|peptidylprolyl isomerase H|rotamase H|small nuclear ribonucleoprotein particlespecific cyclophilin	CDS	GTGATGAGAAAGATTGAGAAT	131.455	123.099	157.138	123.132	109.912	114.407
NM_006347.3-265s21c1	TRCN0000289677	NM_006347	PPIH	10465	PPIase h|UsnRNPassociated cyclophilin SunCyp20|USACyP SnuCyp20|cyclophilin H|peptidyl prolyl isomerase H (cyclophilin H)|peptidylprolyl cistrans isomerase H|peptidylprolyl isomerase H|rotamase H|small nuclear ribonucleoprotein particlespecific cyclophilin	CDS	CCACAGGGTCATAAAGGATTT	93.3337	142.899	118.343	103.286	173.227	135.34
NM_006347.3-408s21c1	TRCN0000306772	NM_006347	PPIH	10465	PPIase h|UsnRNPassociated cyclophilin SunCyp20|USACyP SnuCyp20|cyclophilin H|peptidyl prolyl isomerase H (cyclophilin H)|peptidylprolyl cistrans isomerase H|peptidylprolyl isomerase H|rotamase H|small nuclear ribonucleoprotein particlespecific cyclophilin	CDS	CGAACAGTGGTCCAAGTACAA	122.869	110.806	102.946	166.332	106.154	124.696
NM_006347.3-146s21c1	TRCN0000289679	NM_006347	PPIH	10465	PPIase h|UsnRNPassociated cyclophilin SunCyp20|USACyP SnuCyp20|cyclophilin H|peptidyl prolyl isomerase H (cyclophilin H)|peptidylprolyl cistrans isomerase H|peptidylprolyl isomerase H|rotamase H|small nuclear ribonucleoprotein particlespecific cyclophilin	CDS	CGCATGAAGATCGAGCTCTTT	139.212	93.088	128.18	130.285	86.1307	117.245
NM_006347.3-107s21c1	TRCN0000306773	NM_006347	PPIH	10465	PPIase h|UsnRNPassociated cyclophilin SunCyp20|USACyP SnuCyp20|cyclophilin H|peptidyl prolyl isomerase H (cyclophilin H)|peptidylprolyl cistrans isomerase H|peptidylprolyl isomerase H|rotamase H|small nuclear ribonucleoprotein particlespecific cyclophilin	CDS	GTGTTCTTTGATGTCAGTATT	93.035	78.6096	94.6575	73.2005	70.6882	74.3137
NM_139126.2-980s21c1	TRCN0000229276	NM_139126	PPIL4	85313	OTTHUMP00000040123|PPIase|cyclophilintype peptidylprolyl cistrans isomerase|peptidylprolyl isomeraselike 4|serologically defined breast cancer antigen NYBR18	CDS	AGTCGGTTGCAAAGGTTAAAT	158.061	148.664	240.435	152.499	179.74	270.367
NM_139126.2-716s21c1	TRCN0000229274	NM_139126	PPIL4	85313	OTTHUMP00000040123|PPIase|cyclophilintype peptidylprolyl cistrans isomerase|peptidylprolyl isomeraselike 4|serologically defined breast cancer antigen NYBR18	CDS	ACCTACCTGATGCAGATATTA	96.5509	102.221	91.7761	91.0688	67.0958	81.241
NM_139126.2-1056s21c1	TRCN0000229277	NM_139126	PPIL4	85313	OTTHUMP00000040123|PPIase|cyclophilintype peptidylprolyl cistrans isomerase|peptidylprolyl isomeraselike 4|serologically defined breast cancer antigen NYBR18	CDS	ACAGGATAAACCACCTAATTT	111.809	94.3473	86.6628	101.424	85.8645	77.1439
NM_139126.2-1066s1c1	TRCN0000049413	NM_139126	PPIL4	85313	OTTHUMP00000040123|PPIase|cyclophilintype peptidylprolyl cistrans isomerase|peptidylprolyl isomeraselike 4|serologically defined breast cancer antigen NYBR18	CDS	CCACCTAATTTGGTTCTGAAA	51.0754	82.4924	101.041	41.3099	70.8367	96.572
NM_139126.2-1864s21c1	TRCN0000219059	NM_139126	PPIL4	85313	OTTHUMP00000040123|PPIase|cyclophilintype peptidylprolyl cistrans isomerase|peptidylprolyl isomeraselike 4|serologically defined breast cancer antigen NYBR18	3UTR	ATACAGATGTTGTCGACATTT	93.162	143.142	96.4083	84.6186	128.965	97.365
NM_006036.1-1914s1c1	TRCN0000075255	NM_006036	PREPL	9581	putative prolyl oligopeptidase	CDS	GCTGATTTAGAGGCTTGCATT	61.5098	113.626	94.1709	42.418	119.172	84.4945
NM_006036.1-2109s1c1	TRCN0000075254	NM_006036	PREPL	9581	putative prolyl oligopeptidase	CDS	CCTCTGACATTAGAAGAATTA	115.523	136.228	142.267	100.533	131.709	156.445
NM_006036.1-2661s1c1	TRCN0000075253	NM_006036	PREPL	9581	putative prolyl oligopeptidase	3UTR	GCTTATACTATTCTCTCCATT	92.5203	124.551	96.9543	69.4873	133.855	110.29
NM_006036.1-1311s1c1	TRCN0000075256	NM_006036	PREPL	9581	putative prolyl oligopeptidase	CDS	CCTGCAATTATGAATTGGGAT	80.6784	126.122	129.84	70.7236	144.5	136.665
NM_006036.1-2373s1c1	TRCN0000075257	NM_006036	PREPL	9581	putative prolyl oligopeptidase	CDS	CCTGGAGGCAATCATGTAATT	91.3154	88.6849	72.578	85.5868	84.6719	73.6209
NM_002797.x-380s1c1	TRCN0000003919	NM_002797	PSMB5	5693	PSX large multifunctional protease X|macropain epsilon chain|multicatalytic endopeptidase complex epsilon chain|proteasome beta 5 subunit|proteasome catalytic subunit 3|proteasome chain 6|proteasome epsilon chain|proteasome subunit MB1|proteasome subunit	CDS	CAATGTCGAATCTATGAGCTT	82.4948	128.508	105.823	66.2453	109.836	106.123
NM_002797.3-525s21c1	TRCN0000352618	NM_002797	PSMB5	5693	PSX large multifunctional protease X|macropain epsilon chain|multicatalytic endopeptidase complex epsilon chain|proteasome beta 5 subunit|proteasome catalytic subunit 3|proteasome chain 6|proteasome epsilon chain|proteasome subunit MB1|proteasome subunit	CDS	CCAGACGGTGAAGAAGGTGAT	92.5014	126.055	130.119	63.6215	113.599	122.259
NM_002797.x-584s1c1	TRCN0000003916	NM_002797	PSMB5	5693	PSX large multifunctional protease X|macropain epsilon chain|multicatalytic endopeptidase complex epsilon chain|proteasome beta 5 subunit|proteasome catalytic subunit 3|proteasome chain 6|proteasome epsilon chain|proteasome subunit MB1|proteasome subunit	CDS	TCTGGCTCTGTGTATGCATAT	87.0601	110.002	47.0247	74.2573	97.8451	39.3561
NM_002797.x-877s1c1	TRCN0000003920	NM_002797	PSMB5	5693	PSX large multifunctional protease X|macropain epsilon chain|multicatalytic endopeptidase complex epsilon chain|proteasome beta 5 subunit|proteasome catalytic subunit 3|proteasome chain 6|proteasome epsilon chain|proteasome subunit MB1|proteasome subunit	3UTR	CCCATCCTCCATCCTATTTAT	67.6255	43.0944	88.2531	51.2521	43.3767	98.8901
NM_002797.x-401s1c1	TRCN0000003917	NM_002797	PSMB5	5693	PSX large multifunctional protease X|macropain epsilon chain|multicatalytic endopeptidase complex epsilon chain|proteasome beta 5 subunit|proteasome catalytic subunit 3|proteasome chain 6|proteasome epsilon chain|proteasome subunit MB1|proteasome subunit	CDS	CGAAATAAGGAACGCATCTCT	98.9635	116.634	155.827	93.5142	106.86	170.804
NM_152501.2-527s1c1	TRCN0000107298	NM_152501	PYHIN1	149628	interferoninducible protein X	CDS	CAGTCAAAGGAATAATCCCAT	111.424	108.829	140.949	101.249	76.688	153.535
NM_152501.2-1285s1c1	TRCN0000107296	NM_152501	PYHIN1	149628	interferoninducible protein X	CDS	ACAGGAAGTATGGCTGTAGTA	123.372	82.3011	137.564	114.983	114.161	149.437
NM_152501.2-1539s1c1	TRCN0000107295	NM_152501	PYHIN1	149628	interferoninducible protein X	CDS	CCATCTCAAGACTCCTCAGAT	94.88	102.004	106.279	87.4268	83.5624	85.2059
NM_152501.2-1128s1c1	TRCN0000107297	NM_152501	PYHIN1	149628	interferoninducible protein X	CDS	GTTTGAGGTTCCAAAGGACAT	98.3787	93.4736	75.0288	91.2882	77.4234	48.7288
NM_152501.2-556s1c1	TRCN0000107299	NM_152501	PYHIN1	149628	interferoninducible protein X	CDS	ACGAAACAGAAAGAAGTGTAT	97.0765	135.315	147.345	89.2259	177.694	147.719
NM_020673.2-619s21c1	TRCN0000218156	NM_020673	RAB22A	57403	GTPbinding protein RAB22A|RASrelated protein RAB22A	CDS	ATGTGATCTTATCGATGTAAG	100.758	143.862	114.421	107.716	161.399	130.636
NM_020673.2-490s21c1	TRCN0000229353	NM_020673	RAB22A	57403	GTPbinding protein RAB22A|RASrelated protein RAB22A	CDS	AGGGTCGGCTGCAGCTATAAT	145.504	168.762	218.642	142.059	190.283	239.042
NM_020673.2-305s21c1	TRCN0000229352	NM_020673	RAB22A	57403	GTPbinding protein RAB22A|RASrelated protein RAB22A	CDS	GGTGTAGGTAAATCGAGTATT	75.3709	91.094	63.5569	56.6129	93.7713	52.5576
NM_020673.2-715s1c1	TRCN0000048140	NM_020673	RAB22A	57403	GTPbinding protein RAB22A|RASrelated protein RAB22A	CDS	CGCGATAAACATAAATGAACT	111.415	100.84	81.8821	107.28	103.085	77.8523
NM_020673.2-357s21c1	TRCN0000218654	NM_020673	RAB22A	57403	GTPbinding protein RAB22A|RASrelated protein RAB22A	CDS	CAAACATCAACCCAACAATAG	99.4467	96.821	55.2036	111.833	97.3593	59.9137
NM_004582.2-661s1c1	TRCN0000036230	NM_004582	RABGGTB	5876		CDS	GCACAGGATTTCTGGCTATTA	91.7526	110.029	94.5106	77.0243	104.759	83.0495
NM_004582.2-768s1c1	TRCN0000036231	NM_004582	RABGGTB	5876		CDS	CCGGAGAAGTTACCAGATGTA	152.687	59.9389	163.006	182.751	44.5293	168.259
NM_004582.2-304s1c1	TRCN0000036233	NM_004582	RABGGTB	5876		CDS	GCCAACATGAATGTGGTGGAA	86.8376	127.29	117.093	80.5335	134.091	108.893
NM_004582.2-141s1c1	TRCN0000036229	NM_004582	RABGGTB	5876		CDS	GCAGATTATATCGCATCCTAT	81.3766	118.778	111.029	73.6147	149.223	128.386
NM_004582.2-253s1c1	TRCN0000036232	NM_004582	RABGGTB	5876		CDS	GACAACTTCATCGCATGAATA	92.4352	119.275	91.3426	83.7836	126.712	90.8764
NM_012415.2-1769s1c1	TRCN0000051311	NM_012415	RAD54B	25788	Fibrinogen silencerbinding protein|RAD54 homolog B|RAD54, S. cerevisiae, homolog of, B|fibrinogen silencer binding protein	CDS	GCTTTATCGAAAGCTGTTAAA	68.6296	72.203	84.97	52.133	54.758	76.9755
NM_012415.2-366s21c1	TRCN0000330064	NM_012415	RAD54B	25788	Fibrinogen silencerbinding protein|RAD54 homolog B|RAD54, S. cerevisiae, homolog of, B|fibrinogen silencer binding protein	CDS	GCACCTACACTGGCAACATTA	103.711	118.212	79.9707	108.892	121.107	79.7518
NM_012415.2-2198s1c1	TRCN0000051312	NM_012415	RAD54B	25788	Fibrinogen silencerbinding protein|RAD54 homolog B|RAD54, S. cerevisiae, homolog of, B|fibrinogen silencer binding protein	CDS	GCAGATTGTTGATGGCTTTAA	109.778	99.0838	183.255	123.727	108.275	219.026
NM_012415.2-1338s21c1	TRCN0000330065	NM_012415	RAD54B	25788	Fibrinogen silencerbinding protein|RAD54 homolog B|RAD54, S. cerevisiae, homolog of, B|fibrinogen silencer binding protein	CDS	CTTCGTTCCCTGGATCAAATT	73.7777	94.8505	78.8893	51.2935	88.5426	75.1247
NM_012415.2-2847s21c1	TRCN0000330066	NM_012415	RAD54B	25788	Fibrinogen silencerbinding protein|RAD54 homolog B|RAD54, S. cerevisiae, homolog of, B|fibrinogen silencer binding protein	3UTR	GACATTCCATTGCTCTTCTTT	14.5194	89.542	94.0823	8.94583	82.6524	87.2708
NM_002886.2-528s21c1	TRCN0000286659	NM_002886	RAP2B	5912	Ras family small GTP binding protein RAP2B|Rasrelated protein RAP2B|small GTP binding protein	CDS	CGGGCTCCTTCATCGAGAAGT	124.257	65.0477	103.542	132.824	131.308	111.687
NM_002886.2-760s1c1	TRCN0000047697	NM_002886	RAP2B	5912	Ras family small GTP binding protein RAP2B|Rasrelated protein RAP2B|small GTP binding protein	CDS	CGTGAAGCGGTACGAGCGCGT	125.431	95.5195	108.181	139.806	156.835	132.135
NM_002886.2-905s1c1	TRCN0000047693	NM_002886	RAP2B	5912	Ras family small GTP binding protein RAP2B|Rasrelated protein RAP2B|small GTP binding protein	CDS	GCCTCGGTAGACGAGCTATTT	115.296	110.472	119.566	116.66	84.9208	113.913
NM_002886.2-913s1c1	TRCN0000047694	NM_002886	RAP2B	5912	Ras family small GTP binding protein RAP2B|Rasrelated protein RAP2B|small GTP binding protein	CDS	AGACGAGCTATTTGCCGAGAT	97.5971	142.745	141.175	87.0952	81.8867	136.447
NM_002886.2-551s1c1	TRCN0000047695	NM_002886	RAP2B	5912	Ras family small GTP binding protein RAP2B|Rasrelated protein RAP2B|small GTP binding protein	CDS	GACCCGACCATCGAAGACTTT	63.6872	85.2642	64.9812	56.9214	65.4324	79.1382
NM_002891.3-1557s1c1	TRCN0000048047	NM_002891	RASGRF1	5923	Rasspecific guanine nucleotidereleasing factor, CDC25 homolog|Rasspecific nucleotide exchange factor CDC25|guanine nucleotide exchange factor|guanine nucleotidereleasing factor, 55 kD	CDS	CCTCATTGACTGCACTTTATT	128.734	90.2714	91.0153	111.77	71.2926	68.2998
NM_002891.3-398s1c1	TRCN0000048046	NM_002891	RASGRF1	5923	Rasspecific guanine nucleotidereleasing factor, CDC25 homolog|Rasspecific nucleotide exchange factor CDC25|guanine nucleotide exchange factor|guanine nucleotidereleasing factor, 55 kD	CDS	CCACAGAGCATGAGGCATTAA	113.514	80.2108	88.9766	109.621	67.3378	63.21
NM_002891.3-1873s1c1	TRCN0000048043	NM_002891	RASGRF1	5923	Rasspecific guanine nucleotidereleasing factor, CDC25 homolog|Rasspecific nucleotide exchange factor CDC25|guanine nucleotide exchange factor|guanine nucleotidereleasing factor, 55 kD	CDS	GCCTCCTTATATTGTGATGAT	114.226	104.806	81.4953	113.597	92.2029	75.009
NM_002891.3-3734s1c1	TRCN0000048044	NM_002891	RASGRF1	5923	Rasspecific guanine nucleotidereleasing factor, CDC25 homolog|Rasspecific nucleotide exchange factor CDC25|guanine nucleotide exchange factor|guanine nucleotidereleasing factor, 55 kD	CDS	CGCAATATTTACTGGACCAAT	97.9788	110.565	109.311	92.5155	102.595	79.1734
NM_002891.3-2666s1c1	TRCN0000048045	NM_002891	RASGRF1	5923	Rasspecific guanine nucleotidereleasing factor, CDC25 homolog|Rasspecific nucleotide exchange factor CDC25|guanine nucleotide exchange factor|guanine nucleotidereleasing factor, 55 kD	CDS	CCTGTCGTGAACTGGACAATA	78.1774	106.783	111.669	69.801	101.207	126.716
NM_016563.2-332s1c1	TRCN0000072990	NM_016563	RASL12	51285	RASlike, family 12 protein|Ras family member Ris	CDS	GTTTCTGACCAAGAGGTTTAT	96.5305	139.476	128.191	99.1214	162.97	133.888
NM_016563.2-341s1c1	TRCN0000072992	NM_016563	RASL12	51285	RASlike, family 12 protein|Ras family member Ris	CDS	CAAGAGGTTTATCAGTGAATA	93.2201	100.377	77.7724	93.2998	111.22	104.969
NM_016563.2-1552s1c1	TRCN0000072988	NM_016563	RASL12	51285	RASlike, family 12 protein|Ras family member Ris	3UTR	CCCACAGTTTATCCAAGGAAA	69.1833	101.558	84.6686	64.2561	107.686	82.9907
NM_016563.2-323s1c1	TRCN0000072989	NM_016563	RASL12	51285	RASlike, family 12 protein|Ras family member Ris	CDS	GACCGTGAAGTTTCTGACCAA	68.015	103.445	64.6713	56.8476	107.307	58.93
NM_016563.2-799s1c1	TRCN0000072991	NM_016563	RASL12	51285	RASlike, family 12 protein|Ras family member Ris	CDS	CCCTCTTCATCTCCGAGGAGA	140.503	137.882	123.21	152.697	143.532	147.076
NM_005676.3-895s21c1	TRCN0000233277	NM_005676	RBM10	8241	RNAbinding protein S11	CDS	CTTCGCCTTCGTCGAGTTTAG	83.0037	82.2824	63.9942	139.332	91.1752	72.0075
NM_005676.3-3183s21c1	TRCN0000233280	NM_005676	RBM10	8241	RNAbinding protein S11	3UTR	GAGCAACTTCTCCACATGTTG	88.93	104.608	86.0802	78.8108	103.478	76.9747
NM_005676.3-1364s21c1	TRCN0000233278	NM_005676	RBM10	8241	RNAbinding protein S11	CDS	TCCAACGTGCGCGTCATAAAG	129.094	122.019	135.918	148.729	129.885	134.453
NM_005676.3-2507s21c1	TRCN0000233279	NM_005676	RBM10	8241	RNAbinding protein S11	CDS	AGCATGGATCTCCCGAAATTG	82.2713	103.452	77.4504	74.3927	108.471	73.6041
NM_005676.3-491s1c1	TRCN0000074736	NM_005676	RBM10	8241	RNAbinding protein S11	CDS	GACATGGACTACCGTTCATAT	67.5568	102.236	100.822	53.6346	100.956	95.6019
NM_003834.1-668s1c1	TRCN0000014261	NM_003834	RGS11	8786	regulator of Gprotein signalling 11	CDS	CATGACCAAGAGTGCAGATTT	165.6	121.051	111.588	179.529	165.448	116
NM_003834.1-1193s1c1	TRCN0000014259	NM_003834	RGS11	8786	regulator of Gprotein signalling 11	CDS	GCTGCACATATACATGCTCAT	150.161	182.249	127.622	156.536	158.413	124.326
NM_003834.1-432s1c1	TRCN0000014260	NM_003834	RGS11	8786	regulator of Gprotein signalling 11	CDS	GATTATGAGAAGGACTGCTAT	113.88	95.4331	66.2276	118.493	77.7431	57.3194
NM_003834.1-1769s1c1	TRCN0000014258	NM_003834	RGS11	8786	regulator of Gprotein signalling 11	3UTR	CCAGTAAATCAGCCAGCGAAT	122.501	113.022	72.6414	127.796	102.491	50.8434
NM_003834.1-1017s1c1	TRCN0000014262	NM_003834	RGS11	8786	regulator of Gprotein signalling 11	CDS	GCATGTGAGGAGCTTCGATAT	141.352	103.504	97.4061	146.839	100.413	80.5802
NM_005614.x-754s1c1	TRCN0000010425	NM_005614	RHEB	6009	GTPbinding protein Rheb|Ras homolog enriched in brain 2	CDS	TTATGTTGGTTGGGAATAAGA	177.147	180.088	194.879	179.968	189.236	182.743
NM_005614.2-514s1c1	TRCN0000039601	NM_005614	RHEB	6009	GTPbinding protein Rheb|Ras homolog enriched in brain 2	CDS	CCTACGATCCAACCATAGAAA	108.624	110.219	130.045	93.3505	91.1082	131.067
NM_005614.x-573s1c1	TRCN0000009865	NM_005614	RHEB	6009	GTPbinding protein Rheb|Ras homolog enriched in brain 2	CDS	TATCATCTTCAACTTGTAGAC	69.3456	115.296	62.3258	56.9309	103.674	50.579
NM_005614.2-750s1c1	TRCN0000039599	NM_005614	RHEB	6009	GTPbinding protein Rheb|Ras homolog enriched in brain 2	CDS	CCTATTATGTTGGTTGGGAAT	108.247	71.0924	65.8178	92.5607	65.4012	52.165
NM_005614.x-624s1c1	TRCN0000010424	NM_005614	RHEB	6009	GTPbinding protein Rheb|Ras homolog enriched in brain 2	CDS	CCTCAGACATACTCCATAGAT	111.001	94.6782	84.7209	101.644	86.7918	79.2586
NM_005785.2-936s1c1	TRCN0000034251	NM_005785	RNF41	10193	neuregulin receptor degradation protein1	CDS	CCTGGAGGAGACAATTGAATA	92.7737	152.055	214.43	77.4799	163.444	277.21
NM_005785.2-1173s1c1	TRCN0000034249	NM_005785	RNF41	10193	neuregulin receptor degradation protein1	CDS	CCGACGCTACTATGAGAACTA	61.5312	111.703	97.6507	60.2738	129.642	70.4624
NM_005785.2-1278s1c1	TRCN0000034253	NM_005785	RNF41	10193	neuregulin receptor degradation protein1	CDS	GCCAGGCCTTGTCATGATATT	127.663	74.1391	111.225	130.781	154.651	108.736
NM_005785.2-423s1c1	TRCN0000034250	NM_005785	RNF41	10193	neuregulin receptor degradation protein1	CDS	CCCTATTTGCAGTGGAGTCTT	130.613	81.5984	75.8424	127.415	53.2134	59.1306
NM_005785.2-408s1c1	TRCN0000034252	NM_005785	RNF41	10193	neuregulin receptor degradation protein1	CDS	CGAAGATCTTATCTGCCCTAT	158.038	116.632	74.6441	139.525	95.2133	53.5803
NM_016125.2-314s1c1	TRCN0000034329	NM_016125	RNFT1	51136	PTD016 protein	CDS	CCAGATAAACTCCATACCTAA	169.128	92.1888	129.716	169.258	76.8463	106.01
NM_016125.2-448s1c1	TRCN0000034330	NM_016125	RNFT1	51136	PTD016 protein	CDS	CTGATGATACTGCCGCAGAAT	171.489	33.6526	23.0455	258.686	43.3562	15.2042
NM_016125.2-571s1c1	TRCN0000034332	NM_016125	RNFT1	51136	PTD016 protein	CDS	TGCAGCATATAACAGGAATTT	137.296	146.206	80.2011	149.542	171.889	98.7227
NM_016125.2-691s1c1	TRCN0000034331	NM_016125	RNFT1	51136	PTD016 protein	CDS	CATTTGAGCTTCTGGGAAGTA	63.2076	94.0535	90.448	54.1167	97.0834	86.2297
NM_016125.2-786s1c1	TRCN0000034333	NM_016125	RNFT1	51136	PTD016 protein	CDS	GCCTTCTTTCATCATGCCTTT	82.9725	119.22	76.2832	95.9292	146.393	90.6254
NM_001009.2-543s1c1	TRCN0000074755	NM_001009	RPS5	6193	40S ribosomal protein S5	CDS	CGGAACATTAAGACCATTGCT	164.258	109.103	138.544	144.865	110.932	135.56
NM_001009.3-353s21c1	TRCN0000344828	NM_001009	RPS5	6193	40S ribosomal protein S5	CDS	AGCATGCCTTCGAGATCATAC	120.469	113.192	144.049	126.742	127.782	155.385
NM_001009.2-263s1c1	TRCN0000074757	NM_001009	RPS5	6193	40S ribosomal protein S5	CDS	GCGCCTCACTAACTCCATGAT	125.945	80.3158	82.4404	205.242	162.666	103.973
NM_001009.2-158s1c1	TRCN0000074753	NM_001009	RPS5	6193	40S ribosomal protein S5	CDS	GCAGGATTACATTGCAGTGAA	99.4456	102.857	88.7295	99.4497	99.2616	98.0258
NM_001009.2-126s1c1	TRCN0000074754	NM_001009	RPS5	6193	40S ribosomal protein S5	CDS	ACCGATGATGTGCAGATCAAT	98.4336	108.705	126.464	90.63	89.2537	116.264
NM_020761.x-4703s1c1	TRCN0000010416	NM_020761	RPTOR	57521	p150 target of rapamycin (TOR)scaffold protein containing WDrepeats|regulatory associated protein of mTOR	3UTR	CATGTAATCAGAGCATTAGCT	115.552	114.311	130.982	98.2416	108.766	125.857
NM_020761.x-411s1c1	TRCN0000018342	NM_020761	RPTOR	57521	p150 target of rapamycin (TOR)scaffold protein containing WDrepeats|regulatory associated protein of mTOR	CDS	GATGAGGCTGATCTTACAGAC	161.31	106.869	123.486	166.217	106.869	125.14
NM_020761.x-1895s1c1	TRCN0000010415	NM_020761	RPTOR	57521	p150 target of rapamycin (TOR)scaffold protein containing WDrepeats|regulatory associated protein of mTOR	CDS	GGACAACGGCCACAAGTACTT	93.6832	114.87	66.1655	83.8782	113.407	61.5608
NM_020761.1-4325s1c1	TRCN0000039770	NM_020761	RPTOR	57521	p150 target of rapamycin (TOR)scaffold protein containing WDrepeats|regulatory associated protein of mTOR	CDS	CGACTACTACATCTCCGTGTA	91.0682	78.034	109.678	85.1309	61.9904	107.774
NM_020761.1-795s1c1	TRCN0000039772	NM_020761	RPTOR	57521	p150 target of rapamycin (TOR)scaffold protein containing WDrepeats|regulatory associated protein of mTOR	CDS	CGAGTCCTCTTTCACTACAAT	109.619	145.897	113.663	99.0349	155.339	106.052
NM_004057.1-179s1c1	TRCN0000054084	NM_004057	S100G	795	calbindin 3|calbindin 3, (vitamin Ddependent calciumbinding protein)|calbindin D9K|calbindinD9K	CDS	CCAGTTTACTCAAAGGTCCAA	75.1952	85.8398	87.9277	55.1775	80.0707	68.1498
NM_004057.1-236s1c1	TRCN0000054087	NM_004057	S100G	795	calbindin 3|calbindin 3, (vitamin Ddependent calciumbinding protein)|calbindin D9K|calbindinD9K	CDS	ATGGAGATGGAGAAGTTAGTT	105.498	95.6613	78.4272	103.803	106.719	89.0789
NM_004057.1-140s1c1	TRCN0000054085	NM_004057	S100G	795	calbindin 3|calbindin 3, (vitamin Ddependent calciumbinding protein)|calbindin D9K|calbindinD9K	CDS	CAAAGGATGAACTGAAGCTAT	114.032	99.635	72.0422	111.939	85.5554	60.1713
NM_004057.1-122s1c1	TRCN0000054086	NM_004057	S100G	795	calbindin 3|calbindin 3, (vitamin Ddependent calciumbinding protein)|calbindin D9K|calbindinD9K	CDS	GTGATCCAGACCAGTTGTCAA	76.1434	70.2703	83.3743	70.5133	67.4916	90.6978
NM_004057.1-156s1c1	TRCN0000054083	NM_004057	S100G	795	calbindin 3|calbindin 3, (vitamin Ddependent calciumbinding protein)|calbindin D9K|calbindinD9K	CDS	GCTATTGATTCAGGCTGAATT	91.2824	87.7873	83.2203	75.2824	84.691	77.6315
NM_017827.2-774s21c1	TRCN0000232585	NM_017827	SARS2	54938	serine tRNA ligase 2, mitochondrial|serinetRNA ligase, mitochondrial|seryltRNA synthetase 2	CDS	ACCTGGAAATTGGCGAGAAAC	124.761	106.46	101.978	117.79	89.9625	94.8636
NM_017827.2-1893s21c1	TRCN0000232588	NM_017827	SARS2	54938	serine tRNA ligase 2, mitochondrial|serinetRNA ligase, mitochondrial|seryltRNA synthetase 2	3UTR	GTCAGTCACTGACCCTGTTAT	133.666	156.854	130.286	125.685	165.92	154.82
NM_017827.2-1203s21c1	TRCN0000232587	NM_017827	SARS2	54938	serine tRNA ligase 2, mitochondrial|serinetRNA ligase, mitochondrial|seryltRNA synthetase 2	CDS	TCACCAAGGTGGAGATGTTTG	68.6299	125.961	79.3271	62.2694	128.165	75.075
NM_017827.2-282s21c1	TRCN0000232584	NM_017827	SARS2	54938	serine tRNA ligase 2, mitochondrial|serinetRNA ligase, mitochondrial|seryltRNA synthetase 2	CDS	GGAACCTCCTGTACGAGTATG	81.1656	74.2313	67.9225	79.6861	60.1086	59.7166
NM_017827.2-990s21c1	TRCN0000232586	NM_017827	SARS2	54938	serine tRNA ligase 2, mitochondrial|serinetRNA ligase, mitochondrial|seryltRNA synthetase 2	CDS	ATGCCAACCCATCCCAAATTT	116.377	97.1912	113.066	120.81	93.2051	123.365
NM_001038.3-789s1c1	TRCN0000044558	NM_001038	SCNN1A	6337	alpha ENaC2|amiloridesensitive epithelial sodium channel alpha subunit|nasal epithelial sodium channel alpha subunit	CDS	CCAGAACAAATCGGACTGCTT	79.4961	70.5415	92.559	57.141	58.8489	79.9905
NM_001038.5-1188s21c1	TRCN0000291450	NM_001038	SCNN1A	6337	alpha ENaC2|amiloridesensitive epithelial sodium channel alpha subunit|nasal epithelial sodium channel alpha subunit	CDS	CGATGTATGGAAACTGCTATA	115.796	114.334	127.419	118.223	112.589	128.244
NM_001038.3-519s1c1	TRCN0000044561	NM_001038	SCNN1A	6337	alpha ENaC2|amiloridesensitive epithelial sodium channel alpha subunit|nasal epithelial sodium channel alpha subunit	CDS	CCCGGAAATTAAAGAGGAGCT	64.9454	60.3225	64.204	64.7149	66.3128	85.8448
NM_001038.3-1626s1c1	TRCN0000044560	NM_001038	SCNN1A	6337	alpha ENaC2|amiloridesensitive epithelial sodium channel alpha subunit|nasal epithelial sodium channel alpha subunit	CDS	GAACAATTACACCGTCAACAA	72.2111	77.4364	64.204	65.6266	77.0711	63.847
NM_001038.5-1288s21c1	TRCN0000291449	NM_001038	SCNN1A	6337	alpha ENaC2|amiloridesensitive epithelial sodium channel alpha subunit|nasal epithelial sodium channel alpha subunit	CDS	CGCAGAGCAGAATGACTTCAT	152.057	127.715	114.015	173.064	147.335	120.793
NM_152699.2-300s1c1	TRCN0000062310	NM_152699	SENP5	205564	SUMO1/sentrin specific protease 5	CDS	CCAACACTTGTGCATTCTGAA	115.509	130.529	109.019	127.972	147.339	115.239
NM_152699.2-1325s1c1	TRCN0000062311	NM_152699	SENP5	205564	SUMO1/sentrin specific protease 5	CDS	CCTTACCAGAACATCGTTCTA	140.532	117.536	129.764	136.501	139.146	111.292
NM_152699.4-2631s21c1	TRCN0000294413	NM_152699	SENP5	205564	SUMO1/sentrin specific protease 5	3UTR	CACTATTGTTACCTCAAATTT	87.1948	122.59	111.494	65.2965	122.968	111.596
NM_152699.4-2205s21c1	TRCN0000294465	NM_152699	SENP5	205564	SUMO1/sentrin specific protease 5	CDS	GACACTCTCTAATCGAATTAT	106.605	94.8139	83.8763	102.996	112.613	69.2421
NM_152699.2-2289s1c1	TRCN0000062312	NM_152699	SENP5	205564	SUMO1/sentrin specific protease 5	CDS	GACTGCTGTTACGAAGTGTAT	121.378	142.602	107.802	127.359	131.441	119.793
NM_005489.1-170s1c1	TRCN0000072864	NM_005489	SH2D3C	10044	SH2 domaincontaining 3C|novel SH2containing protein 3	CDS	CCAGAGAAACTCCACAAGGAA	199.544	120.276	77.3717	112.403	91.6385	55.3317
NM_005489.1-1568s1c1	TRCN0000072866	NM_005489	SH2D3C	10044	SH2 domaincontaining 3C|novel SH2containing protein 3	CDS	GCGCTGCTGCACAAGACCATT	55.0297	80.599	74.4339	41.4321	64.8715	66.1532
NM_005489.1-157s1c1	TRCN0000072865	NM_005489	SH2D3C	10044	SH2 domaincontaining 3C|novel SH2containing protein 3	CDS	CCTGGACTCATCGCCAGAGAA	83.6108	72.837	48.1773	108.826	82.2701	44.865
NM_005489.1-415s1c1	TRCN0000072867	NM_005489	SH2D3C	10044	SH2 domaincontaining 3C|novel SH2containing protein 3	CDS	CACACACATCCAGTACCTGTT	15.4729	-0.0820414	2.3004	48.1645	2.17482	8.32015
NM_005489.1-1215s1c1	TRCN0000072863	NM_005489	SH2D3C	10044	SH2 domaincontaining 3C|novel SH2containing protein 3	CDS	CCATCGTGGAAGTCACTTCTT	63.2205	98.5886	97.1231	55.3878	107.493	117.068
NM_003036.2-2364s21c1	TRCN0000235448	NM_003036	SKI	6497	Avian sarcoma viral (vski) oncogene homolog|ski oncoprotein|vski avian sarcoma viral oncogene homolog|vski sarcoma viral oncogene homolog	3UTR	ACGTCTTACCGTGCCTATTAC	139.02	126.676	182.073	133.145	142.978	184.054
NM_003036.1-543s1c1	TRCN0000039711	NM_003036	SKI	6497	Avian sarcoma viral (vski) oncogene homolog|ski oncoprotein|vski avian sarcoma viral oncogene homolog|vski sarcoma viral oncogene homolog	CDS	GCTGGAGATCCTCAAAGTCAT	110.081	126.965	103.803	91.8337	105.697	89.1542
NM_003036.2-737s21c1	TRCN0000235447	NM_003036	SKI	6497	Avian sarcoma viral (vski) oncogene homolog|ski oncoprotein|vski avian sarcoma viral oncogene homolog|vski sarcoma viral oncogene homolog	CDS	ACGAGTGCTTCGGCAAGTGTA	117.207	116.296	70.4632	107.522	85.7927	56.621
NM_003036.2-992s21c1	TRCN0000235446	NM_003036	SKI	6497	Avian sarcoma viral (vski) oncogene homolog|ski oncoprotein|vski avian sarcoma viral oncogene homolog|vski sarcoma viral oncogene homolog	CDS	TGAAGGAGAAATTCGACTATG	104.02	70.9882	185.538	89.1239	65.8879	200.388
NM_003036.x-2070s1c1	TRCN0000010437	NM_003036	SKI	6497	Avian sarcoma viral (vski) oncogene homolog|ski oncoprotein|vski avian sarcoma viral oncogene homolog|vski sarcoma viral oncogene homolog	CDS	GATCGAAGACCTGCAGGTGAA	70.0784	127.315	76.6969	54.5155	102.901	67.1504
NM_197965.1-465s1c1	TRCN0000043537	NM_197965	SLC10A6	345274	sodiumdependent organic anion transporter	CDS	GCAGAATCTCACCATTCCTTA	170.923	131.485	97.5116	194.812	106.306	83.7284
NM_197965.1-891s1c1	TRCN0000043533	NM_197965	SLC10A6	345274	sodiumdependent organic anion transporter	CDS	GCTGATAGATGGATTTCTTAT	129.048	88.7806	102.035	130.247	119.288	129.631
NM_197965.1-764s1c1	TRCN0000043534	NM_197965	SLC10A6	345274	sodiumdependent organic anion transporter	CDS	GCAGGACAATTTCCTTAGAAA	94.0205	86.7018	63.6475	115.02	129.878	75.5216
NM_197965.1-684s1c1	TRCN0000043536	NM_197965	SLC10A6	345274	sodiumdependent organic anion transporter	CDS	CATCAGTTTCATCTTTCCTTT	136.94	74.3945	72.1715	114.036	50.3202	52.2922
NM_197965.1-481s1c1	TRCN0000043535	NM_197965	SLC10A6	345274	sodiumdependent organic anion transporter	CDS	CCTTATCAGAACATAGGAATT	73.8224	98.929	98.3041	66.3859	95.0735	79.9728
NM_004858.1-1785s1c1	TRCN0000043180	NM_004858	SLC4A8	9498	Na+driven ClHCO3 exchanger	CDS	CCGTTTCACTGAAGAAGCATT	124.973	123.362	142.915	122.751	153.889	146.462
NM_004858.1-757s1c1	TRCN0000043179	NM_004858	SLC4A8	9498	Na+driven ClHCO3 exchanger	CDS	CCTCATTTGATGGATAAACAT	110.256	84.1206	120.107	103.353	88.4509	117.668
NM_004858.1-2368s1c1	TRCN0000043178	NM_004858	SLC4A8	9498	Na+driven ClHCO3 exchanger	CDS	GCTGCAATTATCCCAGCTCTT	133.87	150.248	111.583	131.091	154.472	102.507
NM_004858.1-519s1c1	TRCN0000043181	NM_004858	SLC4A8	9498	Na+driven ClHCO3 exchanger	CDS	GCTAAGGAGCTGCCTTATTAA	70.1252	96.9036	81.2947	55.2347	79.1443	71.2096
NM_004858.1-1910s1c1	TRCN0000043182	NM_004858	SLC4A8	9498	Na+driven ClHCO3 exchanger	CDS	GCCTCTATTACTGCAGGTGTA	75.2209	113.753	93.3946	62.0753	92.5353	71.0705
NM_014270.1-876s1c1	TRCN0000043082	NM_014270	SLC7A9	11136	B(0,+)type amino acid transporter 1|bo,+ amino acid transporter|glycoproteinassociated amino acid transporter b0,+AT1|solute carrier family 7, member 9	CDS	GCCTATGATGGATGGAATCAA	62.2282	90.7952	100.8	50.8292	76.7321	99.4857
NM_014270.1-1367s1c1	TRCN0000043081	NM_014270	SLC7A9	11136	B(0,+)type amino acid transporter 1|bo,+ amino acid transporter|glycoproteinassociated amino acid transporter b0,+AT1|solute carrier family 7, member 9	CDS	CGTGATGAGATTTACAAGGAA	82.8944	99.572	71.2205	66.4456	97.0316	68.4967
NM_014270.1-926s1c1	TRCN0000043080	NM_014270	SLC7A9	11136	B(0,+)type amino acid transporter 1|bo,+ amino acid transporter|glycoproteinassociated amino acid transporter b0,+AT1|solute carrier family 7, member 9	CDS	CCCTTACAGAAACCTGCCTTT	138.264	76.538	134.403	158.554	82.1274	194.65
NM_014270.1-1287s1c1	TRCN0000043078	NM_014270	SLC7A9	11136	B(0,+)type amino acid transporter 1|bo,+ amino acid transporter|glycoproteinassociated amino acid transporter b0,+AT1|solute carrier family 7, member 9	CDS	CCTGGTGACATAAACTCGTTA	114.753	84.8739	67.369	104.177	71.6647	74.2782
NM_014270.1-1594s1c1	TRCN0000043079	NM_014270	SLC7A9	11136	B(0,+)type amino acid transporter 1|bo,+ amino acid transporter|glycoproteinassociated amino acid transporter b0,+AT1|solute carrier family 7, member 9	CDS	CCATGCACCTTCAGATGCTAA	92.255	126.569	107.716	80.4255	115.006	96.8262
NM_017435.2-1301s1c1	TRCN0000043293	NM_017435	SLCO1C1	53919	solute carrier family 21 (organic anion transporter), member 14	CDS	CCTCTGAGAAATCCAAGTTTA	90.6418	86.0971	126.439	71.2818	73.1161	122.627
NM_017435.2-834s1c1	TRCN0000043297	NM_017435	SLCO1C1	53919	solute carrier family 21 (organic anion transporter), member 14	CDS	CCTAGAGTCAAGCAGTCAATT	117.848	153.522	143.568	130.959	162.715	167.373
NM_017435.2-2131s1c1	TRCN0000043296	NM_017435	SLCO1C1	53919	solute carrier family 21 (organic anion transporter), member 14	CDS	GCCTTGGGTATCTACACATTA	104.22	106.089	89.1251	90.4033	104.051	89.5473
NM_017435.2-1108s1c1	TRCN0000043294	NM_017435	SLCO1C1	53919	solute carrier family 21 (organic anion transporter), member 14	CDS	GCCAAACTATATGTTGACATT	64.1308	96.0558	114.831	60.2157	107.927	123.217
NM_017435.2-771s1c1	TRCN0000043295	NM_017435	SLCO1C1	53919	solute carrier family 21 (organic anion transporter), member 14	CDS	GCAGTACAAATATGAGAGATA	69.6291	98.5566	99.5793	65.2104	100.212	99.4416
NM_004787.1-2658s21c1	TRCN0000312653	NM_004787	SLIT2	9353	slit homolog 2	CDS	TCGCACCTTTGATGGATTAAA	73.6311	163.824	135.961	59.2452	150.836	138.338
NM_004787.1-3737s21c1	TRCN0000312652	NM_004787	SLIT2	9353	slit homolog 2	CDS	TTCGGCCTCAGACGAACATAA	72.8692	109.609	112.184	60.5076	70.4128	118.218
NM_004787.1-1153s21c1	TRCN0000363636	NM_004787	SLIT2	9353	slit homolog 2	CDS	CCTGGAGCTTTCTCACCATAT	90.9907	92.6902	99.6535	80.9865	87.8506	108.505
NM_004787.1-2869s1c1	TRCN0000056308	NM_004787	SLIT2	9353	slit homolog 2	CDS	CCTGGAGAAATGGCAGATAAA	61.7743	94.223	90.1017	53.7748	96.0181	111.627
NM_004787.1-2613s1c1	TRCN0000056310	NM_004787	SLIT2	9353	slit homolog 2	CDS	CCTCACCTTAATTCTTAGTTA	97.9605	96.4697	100.578	79.3969	102.457	100.411
NM_014006.2-332s1c1	TRCN0000037413	NM_014006	SMG1	23049	lambda/iota protein kinase Cinteracting protein|phosphatidylinositol 3kinaserelated protein kinase	CDS	GCACTGTAACTACGGCTACAA	107.192	124.399	142.52	105.097	145.656	120.337
NM_014006.2-6826s1c1	TRCN0000037412	NM_014006	SMG1	23049	lambda/iota protein kinase Cinteracting protein|phosphatidylinositol 3kinaserelated protein kinase	CDS	CGGCAAATCATATTTCCAGAA	70.716	86.1556	40.0115	47.9551	87.191	30.8374
NM_015092.3-10068s21c1	TRCN0000244938	NM_015092	SMG1	23049	lambda/iota protein kinase Cinteracting protein|phosphatidylinositol 3kinaserelated protein kinase	CDS	GAGTTAGAGCTTCGTTTATTA	135.711	156.6	172.195	145.743	174.962	197.013
NM_015092.3-934s21c1	TRCN0000244935	NM_015092	SMG1	23049	lambda/iota protein kinase Cinteracting protein|phosphatidylinositol 3kinaserelated protein kinase	CDS	CTCGATGTTACCCTCATATTT	96.5235	99.6123	85.5596	85.7487	101.621	75.9249
NM_014006.2-2487s1c1	TRCN0000037411	NM_014006	SMG1	23049	lambda/iota protein kinase Cinteracting protein|phosphatidylinositol 3kinaserelated protein kinase	CDS	CCCAATTAGAAGCCATCTCAT	146.646	125.104	49.8102	182.633	103.347	34.3472
NM_006062.1-806s1c1	TRCN0000156306	NM_006062	SMYD5	10322	retinoic acid induced 15|retinoic acid responsive	CDS	CTGTGACACTCTGGAGTTGAA	125.384	116.459	94.5788	91.7847	100.286	79.2809
NM_006062.1-494s1c1	TRCN0000155068	NM_006062	SMYD5	10322	retinoic acid induced 15|retinoic acid responsive	CDS	GACTGCAAGCATCATGTTGAT	70.1875	83.4301	66.7484	56.8605	75.8871	66.3306
NM_006062.1-1164s1c1	TRCN0000157653	NM_006062	SMYD5	10322	retinoic acid induced 15|retinoic acid responsive	CDS	GAACCCAATGTGACCTCAGAA	57.7278	98.7417	71.1289	52.5125	102.706	78.3939
NM_006062.1-2299s1c1	TRCN0000155095	NM_006062	SMYD5	10322	retinoic acid induced 15|retinoic acid responsive	3UTR	GCTATGGGAATTACAACCCAT	86.5113	89.9424	85.5555	82.5277	84.2261	85.49
NM_006062.1-597s1c1	TRCN0000154724	NM_006062	SMYD5	10322	retinoic acid induced 15|retinoic acid responsive	CDS	GCCAATGAAGAGGAGGAAATT	76.1716	92.2719	63.2335	75.2343	86.3366	53.0254
NM_003098.2-761s21c1	TRCN0000300043	NM_003098	SNTA1	6640	acidic alpha 1 syntrophin|dystrophinassociated protein A1, 59kD, acidic component|proTGFalpha cytoplasmic domaininteracting protein 1|syntrophin, alpha 1 (dystrophinassociated protein A1, 59kD, acidic component)	CDS	GCTGGAGGTCAAGTATATGAA	129.617	138.923	192.838	143.997	154.44	275.306
NM_003098.2-587s1c1	TRCN0000053451	NM_003098	SNTA1	6640	acidic alpha 1 syntrophin|dystrophinassociated protein A1, 59kD, acidic component|proTGFalpha cytoplasmic domaininteracting protein 1|syntrophin, alpha 1 (dystrophinassociated protein A1, 59kD, acidic component)	CDS	CCGGGAGAACAAGATGCCTAT	92.1303	108.573	122.03	78.3135	98.1203	111.407
NM_003098.2-602s21c1	TRCN0000300042	NM_003098	SNTA1	6640	acidic alpha 1 syntrophin|dystrophinassociated protein A1, 59kD, acidic component|proTGFalpha cytoplasmic domaininteracting protein 1|syntrophin, alpha 1 (dystrophinassociated protein A1, 59kD, acidic component)	CDS	GCCTATTCTCATTTCCAAGAT	158.622	79.128	84.5053	195.439	68.0033	72.8192
NM_003098.2-1153s1c1	TRCN0000053450	NM_003098	SNTA1	6640	acidic alpha 1 syntrophin|dystrophinassociated protein A1, 59kD, acidic component|proTGFalpha cytoplasmic domaininteracting protein 1|syntrophin, alpha 1 (dystrophinassociated protein A1, 59kD, acidic component)	CDS	TCAAGCAGATTGGCTGGCTAA	88.7246	113.463	103.165	86.4997	113.958	123.409
NM_003098.2-790s21c1	TRCN0000300107	NM_003098	SNTA1	6640	acidic alpha 1 syntrophin|dystrophinassociated protein A1, 59kD, acidic component|proTGFalpha cytoplasmic domaininteracting protein 1|syntrophin, alpha 1 (dystrophinassociated protein A1, 59kD, acidic component)	CDS	CACCGTATTTCAAGAACTCTA	119.204	114.618	133.583	127.431	100.512	100.566
NM_005841.1-417s21c1	TRCN0000344734	NM_005841	SPRY1	10252	sprouty homolog 1, antagonist of FGF signaling|sprouty, Drosophila, homolog of, 1 (antagonist of FGF signaling)	CDS	AGATTCAGCCTACTGCTATTT	77.2284	101.945	83.8269	64.6888	111.826	72.1451
NM_005841.1-1164s21c1	TRCN0000344733	NM_005841	SPRY1	10252	sprouty homolog 1, antagonist of FGF signaling|sprouty, Drosophila, homolog of, 1 (antagonist of FGF signaling)	CDS	AGCTGTGCAGGAGGTGTTATG	55.4477	88.6992	88.4474	57.4629	96.8012	113.723
NM_005841.1-988s1c1	TRCN0000056937	NM_005841	SPRY1	10252	sprouty homolog 1, antagonist of FGF signaling|sprouty, Drosophila, homolog of, 1 (antagonist of FGF signaling)	CDS	GTGCTTAGTCAAGGGCATCTT	98.9041	100.19	143.914	105.002	107.036	161.78
NM_005841.1-390s21c1	TRCN0000344796	NM_005841	SPRY1	10252	sprouty homolog 1, antagonist of FGF signaling|sprouty, Drosophila, homolog of, 1 (antagonist of FGF signaling)	CDS	GCCGTCAGAGATTAGACTATG	55.1733	111.869	91.4547	37.9719	106.322	87.3993
NM_005841.1-1508s21c1	TRCN0000344795	NM_005841	SPRY1	10252	sprouty homolog 1, antagonist of FGF signaling|sprouty, Drosophila, homolog of, 1 (antagonist of FGF signaling)	3UTR	GCCATCCACTTGAGGGTATTG	70.7967	115.268	112.387	64.9741	139.646	133.837
NM_152280.3-653s21c1	TRCN0000379553	NM_152280	SYT11	23208	synaptotagmin 12	CDS	AGAACTAAGGAGCCCTATTAC	115.545	108.655	78.316	111.07	95.5506	69.7012
NM_152280.3-1389s21c1	TRCN0000381531	NM_152280	SYT11	23208	synaptotagmin 12	CDS	AGCATCGAGTTCCTCGTTATC	94.4612	101.972	81.7784	77.1278	96.889	74.6685
NM_152280.3-600s21c1	TRCN0000379654	NM_152280	SYT11	23208	synaptotagmin 12	CDS	CCTAGCTCTGGATCTTGTATA	116.21	105.662	128.941	123.062	107.956	119.729
NM_152280.3-1540s21c1	TRCN0000382480	NM_152280	SYT11	23208	synaptotagmin 12	CDS	ACAGTCTGAGCGAGTACTAAT	171.994	93.0795	135.183	159.459	81.5494	120.616
NM_152280.3-862s21c1	TRCN0000381590	NM_152280	SYT11	23208	synaptotagmin 12	CDS	TGACCATCCTTCCTGACAAAC	104.512	111.426	83.1948	104.338	112.331	83.8934
NM_015093.x-1983s1c1	TRCN0000004452	NM_015093	TAB2	23118	OTTHUMP00000040125|TAK1binding protein 2	CDS	AGATTGACATTGACTGCTTAA	66.8071	105.22	160.525	49.8941	105.944	177.652
NM_015093.3-1096s21c1	TRCN0000378661	NM_015093	TAB2	23118	OTTHUMP00000040125|TAK1binding protein 2	CDS	TTCTGCCCATAGCCAATATAA	53.1674	162.112	171.703	49.8006	216.235	227.026
NM_015093.x-236s1c1	TRCN0000004453	NM_015093	TAB2	23118	OTTHUMP00000040125|TAK1binding protein 2	CDS	CCTGAAGTACCTGAAGTTGTT	56.7172	99.32	99.7049	46.1536	84.065	85.61
NM_015093.x-2264s1c1	TRCN0000004456	NM_015093	TAB2	23118	OTTHUMP00000040125|TAK1binding protein 2	3UTR	TGGCCCTGTATCTTCTCTAAA	90.7395	77.6561	86.952	82.81	78.5803	90.8134
NM_015093.3-1496s21c1	TRCN0000352680	NM_015093	TAB2	23118	OTTHUMP00000040125|TAK1binding protein 2	CDS	AGTCGAGCAATAGGCAATAAC	124.932	118.459	103.95	123.955	102.487	103.995
NM_000593.4-1226s1c1	TRCN0000038233	NM_000593	TAP1	6890	ABC transporter, MHC 1|ATPbinding cassette transporter|ATPbinding cassette, subfamily B (MDR/TAP), member 2|ATPbinding cassette, subfamily B, member 2|antigen peptide transporter 1|peptide supply factor 1|transporter 1, ATPbinding cassette, subfamily B|tr	CDS	CCTGAGTGATTCTCTGAGTGA	146.971	126.107	117.547	132.856	115.806	119.924
NM_000593.5-1073s21c1	TRCN0000291438	NM_000593	TAP1	6890	ABC transporter, MHC 1|ATPbinding cassette transporter|ATPbinding cassette, subfamily B (MDR/TAP), member 2|ATPbinding cassette, subfamily B, member 2|antigen peptide transporter 1|peptide supply factor 1|transporter 1, ATPbinding cassette, subfamily B|tr	CDS	CGGGATCTATAACAACACCAT	68.8122	112.218	87.2402	51.3331	113.559	69.5928
NM_000593.4-1673s1c1	TRCN0000038232	NM_000593	TAP1	6890	ABC transporter, MHC 1|ATPbinding cassette transporter|ATPbinding cassette, subfamily B (MDR/TAP), member 2|ATPbinding cassette, subfamily B, member 2|antigen peptide transporter 1|peptide supply factor 1|transporter 1, ATPbinding cassette, subfamily B|tr	CDS	CCTTGTCACATTTGTTCTCTA	56.3628	74.5422	119.035	41.1125	64.0892	114.762
NM_000593.4-1007s1c1	TRCN0000038231	NM_000593	TAP1	6890	ABC transporter, MHC 1|ATPbinding cassette transporter|ATPbinding cassette, subfamily B (MDR/TAP), member 2|ATPbinding cassette, subfamily B, member 2|antigen peptide transporter 1|peptide supply factor 1|transporter 1, ATPbinding cassette, subfamily B|tr	CDS	CGATACCTTCACTCGAAACTT	116.182	116.651	140.486	125.59	157.34	171.546
NM_000593.4-2325s1c1	TRCN0000038230	NM_000593	TAP1	6890	ABC transporter, MHC 1|ATPbinding cassette transporter|ATPbinding cassette, subfamily B (MDR/TAP), member 2|ATPbinding cassette, subfamily B, member 2|antigen peptide transporter 1|peptide supply factor 1|transporter 1, ATPbinding cassette, subfamily B|tr	CDS	CCGTGTGTACTTATCCTGGAT	69.3173	99.567	79.8915	51.2362	84.3122	71.3996
NM_023919.1-726s1c1	TRCN0000014148	NM_023919	TAS2R7	50837	taste receptor, family B, member 4	CDS	CCTCTTTATTGCCTACTATTT	130.799	138.861	146.672	135.966	134.311	152.548
NM_023919.1-411s1c1	TRCN0000014150	NM_023919	TAS2R7	50837	taste receptor, family B, member 4	CDS	CGTGGTTCTCTCTGTGTTTAT	69.8213	108.17	56.8858	100.831	114.236	58.3475
NM_023919.1-230s1c1	TRCN0000014149	NM_023919	TAS2R7	50837	taste receptor, family B, member 4	CDS	CCACTGGTAAAGAAATGAGAA	104.011	99.6343	99.615	115.558	116.861	101.279
NM_023919.1-624s1c1	TRCN0000014151	NM_023919	TAS2R7	50837	taste receptor, family B, member 4	CDS	GCGGAGACATATCAGGCGAAT	66.5257	105.407	64.9385	68.4318	111.148	73.4267
NM_023919.1-155s1c1	TRCN0000014152	NM_023919	TAS2R7	50837	taste receptor, family B, member 4	CDS	CCATATCCAGAATTTGTCTAT	134.307	143.308	161.728	144.872	152.276	149
NM_007111.4-557s21c1	TRCN0000274229	NM_007111	TFDP1	7027		CDS	CCTACGGCATTTCTCCATGAA	100.496	83.8812	107.119	84.853	111.916	116.605
NM_007111.4-1265s21c1	TRCN0000274179	NM_007111	TFDP1	7027		CDS	TTCCACGTCTAACGGCACAAG	134.216	136.9	155.077	115.908	135.938	156.985
NM_007111.4-1828s21c1	TRCN0000285159	NM_007111	TFDP1	7027		3UTR	CCGCTTATTTGCCGTGAGTTT	42.0249	63.7236	77.7081	31.0372	94.4484	79.413
NM_007111.4-1410s21c1	TRCN0000274180	NM_007111	TFDP1	7027		CDS	GACGATGACTTCAACGAGAAT	107.862	100.063	90.3433	90.6964	90.2297	64.3843
NM_007111.4-1027s21c1	TRCN0000274230	NM_007111	TFDP1	7027		CDS	TCGACTGCAGCATCTCCAATG	81.6395	67.832	68.6159	71.7996	72.6923	60.4374
NM_017510.4-670s21c1	TRCN0000291568	NM_017510	TMED9	54732	gp25L2 protein	CDS	CGGCACCTCAAGAGCTTCTTT	74.0524	97.2633	104.443	58.4228	105.337	92.7393
NM_017510.3-144s1c1	TRCN0000072800	NM_017510	TMED9	54732	gp25L2 protein	CDS	GAAGTGCTTTATTGAGGAGAT	72.4599	119.376	104.248	60.529	115.504	86.5276
NM_017510.4-448s21c1	TRCN0000291622	NM_017510	TMED9	54732	gp25L2 protein	CDS	GCCAATGACTATGCAGAAATT	43.1209	56.8282	52.1349	29.9891	40.0458	43.1779
NM_017510.3-469s1c1	TRCN0000072799	NM_017510	TMED9	54732	gp25L2 protein	CDS	GCTGCTAAAGACAAGTTGAGT	75.2291	99.14	96.64	66.321	85.3209	87.0562
NM_017510.4-1049s21c1	TRCN0000291567	NM_017510	TMED9	54732	gp25L2 protein	3UTR	GCCAGTCTTCTGTCTTCCTTT	68.365	99.1141	102.502	55.7461	76.1444	91.8141
NM_012470.2-2084s21c1	TRCN0000307728	NM_012470	TNPO3	23534	importin 12|transportinSR	CDS	CCGATTACCTTTGGATAAGAT	86.1881	129.411	87.1261	53.1573	73.5545	63.5311
NM_012470.2-867s21c1	TRCN0000291605	NM_012470	TNPO3	23534	importin 12|transportinSR	CDS	CGGCGCACAGAAATTATAGAA	115.794	92.4551	80.3202	102.126	77.0717	60.4913
NM_012470.2-1374s21c1	TRCN0000291604	NM_012470	TNPO3	23534	importin 12|transportinSR	CDS	CCTCAATATGAGGTAGTAGAA	87.8355	81.6032	127.177	71.3671	96.6397	134.635
NM_012470.2-3217s21c1	TRCN0000296949	NM_012470	TNPO3	23534	importin 12|transportinSR	3UTR	ACCAGACTGTGTCCCACAATC	100.614	116.661	84.4002	97.519	103.482	65.2492
NM_012470.2-2331s1c1	TRCN0000038332	NM_012470	TNPO3	23534	importin 12|transportinSR	CDS	CGAGCTGATAATCGGATTGTA	66.3489	71.0666	72.6058	55.2196	50.6612	58.1124
NM_005657.1-2981s21c1	TRCN0000229639	NM_005657	TP53BP1	7158	tumor protein 53binding protein, 1|tumor protein p53 binding protein, 1|tumor protein p53binding protein, 1	CDS	CAGTACTCCTATTGGTATTAG	128.965	118.573	103.585	121.91	102.343	89.5843
NM_005657.1-2332s1c1	TRCN0000018866	NM_005657	TP53BP1	7158	tumor protein 53binding protein, 1|tumor protein p53 binding protein, 1|tumor protein p53binding protein, 1	CDS	CCAGTGTGATTAGTATTGATT	119.058	105.843	82.8958	92.248	103.521	70.9604
NM_005657.1-219s21c1	TRCN0000218999	NM_005657	TP53BP1	7158	tumor protein 53binding protein, 1|tumor protein p53 binding protein, 1|tumor protein p53binding protein, 1	CDS	GATACTCCTTGCCTGATAATT	120.817	110.445	110.197	118.505	103.268	105.548
NM_005657.1-1219s1c1	TRCN0000018869	NM_005657	TP53BP1	7158	tumor protein 53binding protein, 1|tumor protein p53 binding protein, 1|tumor protein p53binding protein, 1	CDS	CCCTTGTTCAGGACAGTCTTT	84.0922	109.588	101.493	64.09	110.084	94.2114
NM_005657.1-6094s21c1	TRCN0000229640	NM_005657	TP53BP1	7158	tumor protein 53binding protein, 1|tumor protein p53 binding protein, 1|tumor protein p53binding protein, 1	3UTR	GATACTTGGTCTTACTGGTTT	59.4713	78.3536	59.4769	47.5846	75.2896	78.595
NM_033550.3-741s21c1	TRCN0000380544	NM_033550	TP53RK	112858	p53related protein kinase	CDS	CCCTGGAACAGCTGAACATTG	0.739894	-0.220904	1.38137	0.181646	-0.38507	0.677538
NM_033550.3-689s1c1	TRCN0000196805	NM_033550	TP53RK	112858	p53related protein kinase	CDS	GAAGACCTCATTCATGGTGAT	93.8983	101.047	98.626	114.255	137.914	141.863
NM_033550.3-1065s1c1	TRCN0000196427	NM_033550	TP53RK	112858	p53related protein kinase	3UTR	GATCTAAGTAAAGGTGTTAAG	72.7067	113.096	163.499	59.5192	133.529	183.548
NM_033550.3-857s1c1	TRCN0000037520	NM_033550	TP53RK	112858	p53related protein kinase	CDS	CCCAACACTGAAACTGTGTTT	103.985	86.3214	53.7524	99.6751	76.6289	50.7508
NM_033550.3-883s1c1	TRCN0000195649	NM_033550	TP53RK	112858	p53related protein kinase	CDS	CTTTCTGAAGAGCTACTCCAC	87.2744	92.1315	103.761	82.9637	91.2706	95.5328
NM_006778.2-831s1c1	TRCN0000007637	NM_006778	TRIM10	10107	Znfinger protein|hematopoietic RING finger 1|ring finger protein 9|tripartite motif protein 10	CDS	CGGACATCAGAAGCACTCTAA	107.917	81.5768	91.9836	95.2946	96.824	113.774
NM_006778.3-1068s21c1	TRCN0000235415	NM_006778	TRIM10	10107	Znfinger protein|hematopoietic RING finger 1|ring finger protein 9|tripartite motif protein 10	CDS	GAGCTCAGTTCTCCTACAAAT	90.5724	104.668	133.618	82.3161	132.621	134.36
NM_006778.3-834s21c1	TRCN0000235419	NM_006778	TRIM10	10107	Znfinger protein|hematopoietic RING finger 1|ring finger protein 9|tripartite motif protein 10	CDS	ACATCAGAAGCACTCTAATAA	127.36	135.268	103.793	239.932	129.47	75.7998
NM_006778.3-1170s21c1	TRCN0000235417	NM_006778	TRIM10	10107	Znfinger protein|hematopoietic RING finger 1|ring finger protein 9|tripartite motif protein 10	CDS	ACACGTGGGTGGTGAGTATAG	100.041	111.765	123.895	106.352	125.823	138.394
NM_006778.3-978s21c1	TRCN0000235416	NM_006778	TRIM10	10107	Znfinger protein|hematopoietic RING finger 1|ring finger protein 9|tripartite motif protein 10	CDS	TATGCTTTGAGTTGGACTATG	103.995	108.201	55.2781	77.1154	90.8432	35.4613
NM_004238.1-5569s21c1	TRCN0000273207	NM_004238	TRIP12	9320	thyroid receptor interacting protein 12	CDS	GTATCTAAGACTGGTTATATT	116.002	133.729	149.025	93.8624	113.414	134.507
NM_004238.1-4549s21c1	TRCN0000273136	NM_004238	TRIP12	9320	thyroid receptor interacting protein 12	CDS	TATCAGTCGATACTGGTATTA	82.8747	87.8569	134.997	65.1866	71.4101	136.056
NM_004238.1-6162s21c1	TRCN0000273135	NM_004238	TRIP12	9320	thyroid receptor interacting protein 12	3UTR	CCTGAGTCAAGGAAACATGTT	132.86	103.952	126.514	142.253	87.9364	115.407
NM_004238.1-3204s21c1	TRCN0000273210	NM_004238	TRIP12	9320	thyroid receptor interacting protein 12	CDS	CCACTACTCAGTCACCTAAAT	79.1513	91.3361	85.2681	69.3039	79.347	79.53
NM_004238.1-5757s21c1	TRCN0000273206	NM_004238	TRIP12	9320	thyroid receptor interacting protein 12	CDS	GTAGGCCTGATCATGGTTATA	86.15	110.323	148.485	81.7527	103.303	165.351
NM_017646.3-401s1c1	TRCN0000034598	NM_017646	TRIT1	54802	tRNA isopentenylpyrophosphate transferase	CDS	GCTCTGGAAAGTTCTTGTCAA	93.8437	125.724	124.533	95.3883	119.171	135.473
NM_017646.3-1152s1c1	TRCN0000034594	NM_017646	TRIT1	54802	tRNA isopentenylpyrophosphate transferase	CDS	CCAATAAAGATGCCGTACAAT	84.5122	101.847	79.7097	79.1769	107.122	73.5742
NM_017646.3-1321s1c1	TRCN0000034595	NM_017646	TRIT1	54802	tRNA isopentenylpyrophosphate transferase	CDS	CCATAGAAAGTCAGAGTGTTT	77.4955	66.9662	45.5363	62.6376	60.9688	39.0779
NM_017646.3-200s1c1	TRCN0000034596	NM_017646	TRIT1	54802	tRNA isopentenylpyrophosphate transferase	CDS	CCTAGACATCATCACCAACAA	107.122	74.8701	86.2042	89.391	54.2587	80.9464
NM_017646.3-830s1c1	TRCN0000034597	NM_017646	TRIT1	54802	tRNA isopentenylpyrophosphate transferase	CDS	CCAGGACTATCAACATGGTAT	164.766	115.667	81.8746	206.525	151.817	68.0103
NM_031472.2-539s1c1	TRCN0000035374	NM_031472	TRPT1	83707	tRNA splicing 2' phosphotransferase 1	CDS	CCATTGTGAAATAGCTGTGTT	73.2915	161.537	68.2586	46.5315	140.764	65.117
NM_031472.2-650s1c1	TRCN0000035378	NM_031472	TRPT1	83707	tRNA splicing 2' phosphotransferase 1	CDS	CCTCCTTCCCAAGTACTTCAA	63.6661	110.53	128.389	55.0441	136.319	137.939
NM_031472.2-629s1c1	TRCN0000035376	NM_031472	TRPT1	83707	tRNA splicing 2' phosphotransferase 1	CDS	TCCAGGGAATACTGATGGCTT	94.4642	79.9436	85.4692	99.3619	77.4554	89.6995
NM_031472.2-403s1c1	TRCN0000035375	NM_031472	TRPT1	83707	tRNA splicing 2' phosphotransferase 1	CDS	CGATGCTAGTCCATGGTACAT	107.847	81.1947	125.057	94.7107	84.4896	132.388
NM_031472.2-435s1c1	TRCN0000035377	NM_031472	TRPT1	83707	tRNA splicing 2' phosphotransferase 1	CDS	TGGCCATCCATCCTACTCAAA	91.75	134.146	63.0741	79.7041	146.423	47.0106
NM_012263.2-1119s1c1	TRCN0000048526	NM_012263	TTLL1	25809	OTTHUMP00000028544|catalytic subunit of neural tubulin polyglutamylase|tubulin tyrosine ligaselike 1|tubulintyrosine ligase	CDS	GCCGGTGATGAACAATGACAA	132.024	87.1884	118.165	124.505	83.4611	111.649
NM_012263.2-391s1c1	TRCN0000048525	NM_012263	TTLL1	25809	OTTHUMP00000028544|catalytic subunit of neural tubulin polyglutamylase|tubulin tyrosine ligaselike 1|tubulintyrosine ligase	CDS	CGGCTCTCAGATGACCAAATA	122.781	124.764	98.9723	109.515	124.586	93.9961
NM_012263.2-1254s1c1	TRCN0000048524	NM_012263	TTLL1	25809	OTTHUMP00000028544|catalytic subunit of neural tubulin polyglutamylase|tubulin tyrosine ligaselike 1|tubulintyrosine ligase	CDS	CCTCAAGTACAACCTGATTAA	142.542	113.65	104.314	128.722	103.882	89.8341
NM_012263.2-757s1c1	TRCN0000048523	NM_012263	TTLL1	25809	OTTHUMP00000028544|catalytic subunit of neural tubulin polyglutamylase|tubulin tyrosine ligaselike 1|tubulintyrosine ligase	CDS	GCCTACGTGATCTCTCTCTAT	117.797	82.5132	121.526	124.797	80.8781	131.455
NM_012263.2-885s1c1	TRCN0000048527	NM_012263	TTLL1	25809	OTTHUMP00000028544|catalytic subunit of neural tubulin polyglutamylase|tubulin tyrosine ligaselike 1|tubulintyrosine ligase	CDS	CCGGTTCTGCACAGTGAAATA	116.291	140.699	127.579	120.037	156.025	123.992
NM_007275.1-289s21c1	TRCN0000299119	NM_007275	TUSC2	11334	PDGFA associated protein 2	CDS	CGCGGCTCTATGTTCTATGAT	72.2573	102.406	115.533	51.0451	67.1673	116.828
NM_007275.1-633s1c1	TRCN0000038084	NM_007275	TUSC2	11334	PDGFA associated protein 2	3UTR	CCACAGTATTGGTTGGGTGTT	123.622	166.619	185.817	116.934	186.06	217.802
NM_007275.1-319s21c1	TRCN0000299117	NM_007275	TUSC2	11334	PDGFA associated protein 2	CDS	GATCTGGCTCACGAGTTCTAT	79.4476	99.8789	63.4925	77.7146	70.7972	62.1557
NM_007275.1-388s1c1	TRCN0000038086	NM_007275	TUSC2	11334	PDGFA associated protein 2	CDS	CGAGTGCATAAGAATCTGATT	70.377	114.907	78.569	66.1626	124.025	63.7756
NM_007275.1-451s21c1	TRCN0000299120	NM_007275	TUSC2	11334	PDGFA associated protein 2	CDS	GATTTCCCTGTGATCCTCTAT	89.5349	127.742	76.438	90.1223	140.003	74.17
NM_015913.2-447s1c1	TRCN0000064390	NM_015913	TXNDC12	51060	anterior gradient homolog 1|endoplasmic reticulum thioredoxin superfamily member, 18 kDa|thioredoxinlike protein p19	CDS	CCTGATGGTGATTATTCATAA	76.9944	69.3307	133.941	64.5753	62.8415	136.719
NM_015913.2-608s1c1	TRCN0000064392	NM_015913	TXNDC12	51060	anterior gradient homolog 1|endoplasmic reticulum thioredoxin superfamily member, 18 kDa|thioredoxinlike protein p19	CDS	GTTATATTCCACGAATCCTTT	73.469	92.8686	198.681	61.3959	83.588	241.48
NM_015913.2-485s1c1	TRCN0000064389	NM_015913	TXNDC12	51060	anterior gradient homolog 1|endoplasmic reticulum thioredoxin superfamily member, 18 kDa|thioredoxinlike protein p19	CDS	GCAAAGCTCTAAAGCCCAAAT	81.1844	109.005	90.3242	72.5238	77.4177	76.3596
NM_015913.2-763s1c1	TRCN0000064388	NM_015913	TXNDC12	51060	anterior gradient homolog 1|endoplasmic reticulum thioredoxin superfamily member, 18 kDa|thioredoxinlike protein p19	CDS	GCCTTCAGAAAGAAACATCTT	127.136	71.6666	49.9942	143.686	65.4348	41.2079
NM_015913.2-334s1c1	TRCN0000064391	NM_015913	TXNDC12	51060	anterior gradient homolog 1|endoplasmic reticulum thioredoxin superfamily member, 18 kDa|thioredoxinlike protein p19	CDS	CTCCTCGTCATCTCTTCTGAT	136.967	117.236	84.7951	132.09	121.087	76.3596
NM_003333.3-904s21c1	TRCN0000272655	NM_003333	UBA52	7311	60S ribosomal protein L40|ribosomal protein L40|ubiquitin and ribosomal protein L40|ubiquitin carboxyl extension protein 52|ubiquitin52 amino acid fusion protein|ubiquitinCEP52	3UTR	AGAACGTTGATTCTCAAATTT	128.829	136.554	126.911	183.461	158.003	151.404
NM_003333.x-389s1c1	TRCN0000010841	NM_003333	UBA52	7311	60S ribosomal protein L40|ribosomal protein L40|ubiquitin and ribosomal protein L40|ubiquitin carboxyl extension protein 52|ubiquitin52 amino acid fusion protein|ubiquitinCEP52	CDS	CACCAACAACCTGCGTCCCAA	77.0082	94.6006	112.522	74.5671	87.2547	137.052
NM_003333.x-401s1c1	TRCN0000003997	NM_003333	UBA52	7311	60S ribosomal protein L40|ribosomal protein L40|ubiquitin and ribosomal protein L40|ubiquitin carboxyl extension protein 52|ubiquitin52 amino acid fusion protein|ubiquitinCEP52	CDS	GCGTCCCAAGAAGAAGGTCAA	100.05	77.642	62.6759	86.1747	63.2012	47.9264
NM_003333.3-422s21c1	TRCN0000272707	NM_003333	UBA52	7311	60S ribosomal protein L40|ribosomal protein L40|ubiquitin and ribosomal protein L40|ubiquitin carboxyl extension protein 52|ubiquitin52 amino acid fusion protein|ubiquitinCEP52	CDS	CCGCAAGAAGAAGTGTGGTCA	103.071	107.356	175.636	112.939	113.932	213.404
NM_003333.x-160s1c1	TRCN0000003996	NM_003333	UBA52	7311	60S ribosomal protein L40|ribosomal protein L40|ubiquitin and ribosomal protein L40|ubiquitin carboxyl extension protein 52|ubiquitin52 amino acid fusion protein|ubiquitinCEP52	CDS	AGCGTCTGATATTTGCCGGCA	58.9353	115.189	95.655	52.6881	105.86	109.353
NM_003340.4-955s1c1	TRCN0000038789	NM_003340	UBE2D3	7323	ubiquitin carrier protein|ubiquitinconjugating enzyme E217 kDa 3|ubiquitinconjugating enzyme E2D 3|ubiquitinconjugating enzyme E2D 3 (homologous to yeast UBC4/5)	3UTR	CCTGCATTATAGCTGGAATAA	86.1715	123.167	87.4479	71.5191	116.837	79.6442
NM_003340.4-770s1c1	TRCN0000038790	NM_003340	UBE2D3	7323	ubiquitin carrier protein|ubiquitinconjugating enzyme E217 kDa 3|ubiquitinconjugating enzyme E2D 3|ubiquitinconjugating enzyme E2D 3 (homologous to yeast UBC4/5)	CDS	GCCTGCTTTAACAATTTCTAA	111.633	109.701	122.021	109.974	110.098	126.718
NM_003340.4-617s1c1	TRCN0000038793	NM_003340	UBE2D3	7323	ubiquitin carrier protein|ubiquitinconjugating enzyme E217 kDa 3|ubiquitinconjugating enzyme E2D 3|ubiquitinconjugating enzyme E2D 3 (homologous to yeast UBC4/5)	CDS	CCCATATCAAGGCGGTGTATT	88.7212	167.386	95.4827	71.5191	192.186	111.218
NM_003340.4-849s1c1	TRCN0000038792	NM_003340	UBE2D3	7323	ubiquitin carrier protein|ubiquitinconjugating enzyme E217 kDa 3|ubiquitinconjugating enzyme E2D 3|ubiquitinconjugating enzyme E2D 3 (homologous to yeast UBC4/5)	CDS	CCAGAGATTGCACGGATCTAT	88.1418	95.3047	80.124	72.3959	81.6853	65.5793
NM_003340.4-591s1c1	TRCN0000038791	NM_003340	UBE2D3	7323	ubiquitin carrier protein|ubiquitinconjugating enzyme E217 kDa 3|ubiquitinconjugating enzyme E2D 3|ubiquitinconjugating enzyme E2D 3 (homologous to yeast UBC4/5)	CDS	GCCACAATTATGGGACCTAAT	77.2256	133.331	75.7297	78.325	134.837	74.1905
NM_016617.1-191s1c1	TRCN0000037004	NM_016617	UFM1	51569		CDS	CCAATGATGGAATAGGAATAA	119.635	90.7351	83.5586	110.801	70.8798	63.8516
NM_016617.1-259s1c1	TRCN0000037005	NM_016617	UFM1	51569		CDS	CTGCGGATTATTCCTAGAGAT	114.093	116.708	89.2835	90.4432	116.947	78.6192
NM_016617.1-249s21c1	TRCN0000232598	NM_016617	UFM1	51569		CDS	TGGTTCAGAACTGCGGATTAT	90.9396	124.507	107.816	73.9636	117.543	78.3239
NM_016617.1-192s21c1	TRCN0000232597	NM_016617	UFM1	51569		CDS	CAATGATGGAATAGGAATAAA	71.6956	98.1039	99.2172	57.2747	77.4395	95.0113
NM_016617.1-119s21c1	TRCN0000257358	NM_016617	UFM1	51569		CDS	CACCTTTCACAGCAGTCTTAA	64.1494	62.4397	106.843	54.892	56.3069	109.041
NM_025076.3-731s21c1	TRCN0000315853	NM_025076	UXS1	80146		CDS	CCACCCTCAAAGTGAGGATTA	151.19	136.787	154.279	146.415	114.339	143.855
NM_025076.2-591s1c1	TRCN0000078491	NM_025076	UXS1	80146		CDS	CCTCCAAACTACATGTATAAT	161.963	151.682	222.321	189.544	166.329	245.329
NM_025076.3-1492s21c1	TRCN0000315771	NM_025076	UXS1	80146		3UTR	GCTTGCTTTAATGAAATGGAT	120.701	115.065	110.16	111.14	123.141	100.392
NM_025076.2-319s1c1	TRCN0000078492	NM_025076	UXS1	80146		CDS	CCCAGAAATACCCACCAGTAA	188.097	154.173	211.33	223.487	153.151	201.688
NM_025076.2-1289s1c1	TRCN0000078490	NM_025076	UXS1	80146		CDS	CCAGGCAAATAATCAGTACAT	169.17	149.374	135.875	139.025	167.262	123.808
NM_030761.3-1331s1c1	TRCN0000083213	NM_030761	WNT4	54361	OTTHUMP00000044725|WNT4 protein	3UTR	CCCAAGAGATACTGGTTGTAT	84.467	98.9499	97.6106	74.3225	96.5594	89.9903
NM_030761.3-892s1c1	TRCN0000083215	NM_030761	WNT4	54361	OTTHUMP00000044725|WNT4 protein	CDS	GCACTGAAGGAGAAGTTTGAT	128.683	96.5901	53.4632	125.984	93.056	45.2444
NM_030761.3-889s1c1	TRCN0000083214	NM_030761	WNT4	54361	OTTHUMP00000044725|WNT4 protein	CDS	CACGCACTGAAGGAGAAGTTT	113.882	84.3903	113.201	119.295	84.3346	161.466
NM_030761.3-651s1c1	TRCN0000083216	NM_030761	WNT4	54361	OTTHUMP00000044725|WNT4 protein	CDS	GTCAGGATGCTCTGACAACAT	49.9009	90.2379	107.228	36.8871	78.7067	111.551
NM_020828.1-679s21c1	TRCN0000232344	NM_020828	ZFP28	140612	zinc finger factor X6|zinc finger protein 28	CDS	AGAGACTCACAAGCTATAATC	160.132	106.678	179.308	185.804	150.516	297.196
NM_020828.1-2299s1c1	TRCN0000017049	NM_020828	ZFP28	140612	zinc finger factor X6|zinc finger protein 28	CDS	CCCTTATTTGTCATCGCAGAA	108.279	109.604	72.1248	95.0618	104.505	51.1077
NM_020828.1-494s1c1	TRCN0000017051	NM_020828	ZFP28	140612	zinc finger factor X6|zinc finger protein 28	CDS	GCTGGGACTTTGTGTTTCTAA	71.3931	109.816	126.072	61.7576	83.2426	137.807
NM_020828.1-2462s21c1	TRCN0000232347	NM_020828	ZFP28	140612	zinc finger factor X6|zinc finger protein 28	CDS	TGGACACCTTAATCAACATAA	88.6592	104.76	163.843	72.3763	90.4688	190.144
NM_020828.1-891s1c1	TRCN0000017050	NM_020828	ZFP28	140612	zinc finger factor X6|zinc finger protein 28	CDS	CCAGATTTAGTCTCTTTACTA	71.5421	96.1931	115.828	61.977	63.4508	123.005
NM_183048.1-3330s21c1	TRCN0000364137	NM_183048	ZMYND8	23613	CTCL tumor antigen se143|cutaneous Tcell lymphoma associated antigen se143|predicted protein of HQ2893|protein kinase C binding protein 1|zinc finger MYND domain containing protein 8	CDS	TGACCATTCCCGGAGTAATAA	97.1746	121.258	118.101	91.0181	120.349	134.038
NM_183048.1-1311s21c1	TRCN0000298853	NM_183048	ZMYND8	23613	CTCL tumor antigen se143|cutaneous Tcell lymphoma associated antigen se143|predicted protein of HQ2893|protein kinase C binding protein 1|zinc finger MYND domain containing protein 8	CDS	CCGGATTTCCTTGTCGGATAT	137.239	95.9581	91.1314	132.772	90.2413	77.6349
NM_183048.1-3338s1c1	TRCN0000037994	NM_183048	ZMYND8	23613	CTCL tumor antigen se143|cutaneous Tcell lymphoma associated antigen se143|predicted protein of HQ2893|protein kinase C binding protein 1|zinc finger MYND domain containing protein 8	CDS	CCCGGAGTAATAAATCCAGTT	110.655	92.3355	87.7495	117.532	79.5463	76.4868
NM_183048.1-2664s21c1	TRCN0000378277	NM_183048	ZMYND8	23613	CTCL tumor antigen se143|cutaneous Tcell lymphoma associated antigen se143|predicted protein of HQ2893|protein kinase C binding protein 1|zinc finger MYND domain containing protein 8	CDS	AGCTGATGTCGCCGCTGATAT	96.2547	80.5531	122.301	94.9012	75.3087	120.691
NM_183048.1-986s1c1	TRCN0000037997	NM_183048	ZMYND8	23613	CTCL tumor antigen se143|cutaneous Tcell lymphoma associated antigen se143|predicted protein of HQ2893|protein kinase C binding protein 1|zinc finger MYND domain containing protein 8	CDS	CCTGGGTTCCAATAAATAATT	77.059	107.537	139.555	59.8698	94.156	134.469
NM_018555.3-2010s1c1	TRCN0000017776	NM_018555	ZNF331	55422	C2H2like zinc finger protein|KRAB zinc finger protein|zinc finger protein 463	CDS	CTAAACCATCTCCGAGAACAT	119.063	199.811	125.666	114.164	197.302	115.087
NM_018555.3-1262s1c1	TRCN0000017773	NM_018555	ZNF331	55422	C2H2like zinc finger protein|KRAB zinc finger protein|zinc finger protein 463	CDS	CCTCGTTATTCATAAGAGGAT	66.288	134.398	80.5254	52.9028	88.1377	88.5213
NM_018555.3-1014s1c1	TRCN0000017774	NM_018555	ZNF331	55422	C2H2like zinc finger protein|KRAB zinc finger protein|zinc finger protein 463	CDS	CCTAGAACACATCAGAGACAT	59.9143	92.1611	59.7371	46.4468	75.1678	46.9267
NM_018555.3-1683s1c1	TRCN0000017777	NM_018555	ZNF331	55422	C2H2like zinc finger protein|KRAB zinc finger protein|zinc finger protein 463	CDS	CTCGTTAAGCACGAGAGGATA	182.933	126.307	103.875	213.266	103.13	98.8441
NM_018555.3-1083s1c1	TRCN0000017775	NM_018555	ZNF331	55422	C2H2like zinc finger protein|KRAB zinc finger protein|zinc finger protein 463	CDS	CGTGGCTATCAACTTAGTCAA	58.9801	106.824	84.7727	45.1273	68.9617	79.5648
NM_005649.2-704s1c1	TRCN0000015329	NM_005649	ZNF354A	6940	transcription factor 17	CDS	GCCCAAAGTCAGTGCTTATTA	116.517	97.1705	91.2184	99.9327	98.8763	82.1455
NM_005649.2-2122s21c1	TRCN0000329894	NM_005649	ZNF354A	6940	transcription factor 17	3UTR	TTAGCCCTCATTAGGTATTTA	97.5448	80.0753	55.1483	81.3187	74.4705	30.2282
NM_005649.2-1038s21c1	TRCN0000329892	NM_005649	ZNF354A	6940	transcription factor 17	CDS	TCTCAGTACATCCCTTTATAA	102.257	126.326	98.5818	101.017	104.385	91.5574
NM_005649.2-703s21c1	TRCN0000329890	NM_005649	ZNF354A	6940	transcription factor 17	CDS	AGCCCAAAGTCAGTGCTTATT	67.0568	101.014	84.9008	53.0442	77.1203	80.4757
NM_005649.2-490s21c1	TRCN0000329891	NM_005649	ZNF354A	6940	transcription factor 17	CDS	CAAACACAAGACTCTTCATTT	146.914	135.28	97.2158	170.949	115.298	94.5935
NM_153358.1-1580s1c1	TRCN0000019820	NM_153358	ZNF791	163049		CDS	CTAGTTACATTCGGATACATA	123.929	161.099	83.0834	113.433	173.188	57.2061
NM_153358.1-1754s1c1	TRCN0000019823	NM_153358	ZNF791	163049		CDS	CCTTTCAAAGACATACAAGAA	90.9148	125.271	85.1425	83.5742	125.78	80.096
NM_153358.1-516s1c1	TRCN0000019822	NM_153358	ZNF791	163049		CDS	CGAGCTATTTGAGAAGCCATA	103.513	127.075	99.1041	108.229	134.762	88.6612
NM_153358.1-1949s1c1	TRCN0000019819	NM_153358	ZNF791	163049		3UTR	GAAGAGAGAAATCCTGTCAAT	51.6075	77.8452	93.6281	37.1164	60.8912	80.096
NM_153358.1-320s1c1	TRCN0000019821	NM_153358	ZNF791	163049		CDS	GACGAAATCTAAGAAGCCATA	92.4973	75.107	91.8404	81.8096	64.5065	73.0075
NM_031218.2-755s1c1	TRCN0000018247	NM_031218	ZNF93	81931	zinc finger protein 505|zinc finger protein 93 (HTF34)	CDS	CCCTTAATACACATAAGAGAA	122.623	158.404	85.4684	113.024	172.027	59.5154
NM_031218.2-513s1c1	TRCN0000018244	NM_031218	ZNF93	81931	zinc finger protein 505|zinc finger protein 93 (HTF34)	CDS	CCAGTGTAGTACAACTACCCA	91.411	124.157	87.2372	84.0744	125.371	81.1701
NM_031218.2-332s1c1	TRCN0000018245	NM_031218	ZNF93	81931	zinc finger protein 505|zinc finger protein 93 (HTF34)	CDS	CCTCAGTTATATGTTCTCATT	103.321	125.88	99.2304	107.978	134.211	89.2731
NM_031218.2-1931s1c1	TRCN0000018246	NM_031218	ZNF93	81931	zinc finger protein 505|zinc finger protein 93 (HTF34)	CDS	GCCTTAGTAGACATGAGATAA	54.2505	78.8224	94.5264	39.0311	61.5117	81.1701
NM_031218.2-1085s1c1	TRCN0000018243	NM_031218	ZNF93	81931	zinc finger protein 505|zinc finger protein 93 (HTF34)	CDS	CCCGTATCCTTACTACACATA	92.9071	76.2049	92.9908	82.3635	65.0696	74.4641
